# Supplementary material for: Predictors of Nonadherence to Medications among Hypertensive Patients in Ghana: An Application of the Health Belief Model
Source: Int J Hypertens. 2022 Aug 24;2022:1418149. doi: 10.1155/2022/1418149 (PMC9433278; doi:10.1155/2022/1418149)
Supplement: Supplementary Materials — Supplementary File: S1: Questionnaire. Supplementary File S2: Data file. [file 1418149.f1.zip]

Archive with 2 entries (2 files):
- S1;Questionnaire.docx
- S2 Data file.txt
