# Supplementary material for: Predictors of Nonadherence to Medications among Hypertensive Patients in Ghana: An Application of the Health Belief Model
Source: Int J Hypertens. 2022 Aug 24;2022:1418149. doi: 10.1155/2022/1418149 (PMC9433278; doi:10.1155/2022/1418149)
Supplement: Supplementary Materials — Supplementary File: S1: Questionnaire. Supplementary File S2: Data file. [file 1418149.f1.zip › S2 Data file.txt]

	AGE	SEX	A3	A4	A5	A6	A7	A8	A9	A10	A11	B12	B13	B14	B15	B16	B17	B18	B19	B20	B21	B22	B23	B24	B25	B26	B27	B28	B29	B30	B31	B32	B33	B34	B35	B36	B37	B38	B39	B40	B41	C42	C43	C44	C45	C46	C47	C48	C49
hpt001	67	M	Married	Yes	Tertiary	Government work	5	Diabetes	None	Anti Hypertensive Medication	5	Agree	Strongly agree	Agree	Agree	Agree	Agree	Strongly agree	Strongly agree	Agree	Strongly agree	Agree	Strongly agree	Agree	Strongly agree	Agree	Uncertain	Strongly agree	Disagree	Strongly Disagree	Disagree	Strongly Disagree	Sometimes	Frequently	Occationally	Rarely	A good chance	A good chance	Average Chance	A good chance	Averae Chance	Average Chance	No	No	No	No	Yes	Yes	No
hpt002	62	M	Married	Yes	Secondary/Vocational	Farmer	5	Heart Failure	NHIS	Anti Dibetic and Hypertensive medication	5	Uncertain	Agree	Agree	Uncertain	Disagree	Agree	Uncertain	Strongly agree	Strongly agree	Strongly agree	Strongly agree	Strongly agree	Strongly agree	Disagree	Disagree	Disagree	Agree	Uncertain	Agree	Uncertain	Uncertain	Occationally	Occationally	Frequently	Never	Average Chance	A good chance	A good chance	Average Chance	Completely certain	Completely certain	Yes	No	No	Yes	Yes	No	No
hpt003	62	M	Married	Yes	Tertiary	Private work	10	Heart Failure	NHIS	Anti Dibetic and Hypertensive medication	10	Agree	Strongly agree	Uncertain	Agree	Strongly agree	Agree	Agree	Strongly agree	Strongly agree	Strongly agree	Agree	Strongly agree	Strongly agree	Agree	Disagree	Disagree	Agree	Strongly agree	Agree	Agree	Agree	Never	Occationally	Sometimes	Rarely	A good chance	A good chance	43	A good chance	Completely certain	No chance at all	No	No	No	Yes	Yes	No	Yes
hpt004	45	M	Married	Yes	Secondary/Vocational	Government work	2	Renal Failure	NHIS	Anti Hypertensive Medication	3	Disagree	Agree	Strongly agree	Strongly agree	Agree	Strongly agree	Strongly agree	Strongly agree	Strongly agree	Strongly agree	Agree	Strongly agree	Strongly agree	Agree	Agree	Agree	Agree	Strongly agree	Agree	Agree	Agree	Occationally	Sometimes	Occationally	Frequently	Average Chance	A good chance	Completely certain	Completely certain	Completely certain	Completely certain	Yes	No	No	No	Yes	Yes	No
hpt005	40	M	Married	Yes	Secondary/Vocational	Private work	3	None	NHIS	Anti Hypertensive Medication	3	Disagree	Strongly Disagree	Disagree	Agree	Disagree	Disagree	Agree	Agree	Strongly agree	Strongly agree	Agree	Agree	Strongly agree	Agree	Strongly agree	Uncertain	Disagree	Disagree	Disagree	Strongly Disagree	Disagree	Sometimes	Occationally	Frequently	Frequently	Average Chance	Completely certain	A good chance	A good chance	Completely certain	Completely certain	No	No	No	No	Yes	Yes	No
hpt006	54	M	Seperated/Widowed	Yes	Basic	Government work	5	None	None	Anti Hypertensive Medication	5	Strongly agree	Agree	Uncertain	Uncertain	Agree	Uncertain	Agree	Strongly agree	Agree	Strongly agree	Agree	Agree	Uncertain	Agree	Uncertain	Agree	Strongly agree	Strongly agree	Agree	Disagree	Agree	Occationally	Rarely	Sometimes	Sometimes	Average Chance	A good chance	Average Chance	A slight chance	Completely certain	Completely certain	No	No	No	No	Yes	No	Yes
hpt007	50	M	Married	Yes	Secondary/Vocational	Private work	5	None	NHIS	Anti Dibetic and Hypertensive medication	5	Strongly agree	Agree	Agree	Uncertain	Agree	Uncertain	Agree	Strongly agree	Agree	Agree	Agree	Agree	Uncertain	Agree	Uncertain	Agree	Agree	Strongly agree	Agree	Disagree	Agree	Occationally	Rarely	Sometimes	Sometimes	Average Chance	A good chance	Average Chance	A slight chance	Completely certain	Completely certain	No	No	No	No	Yes	No	Yes
hpt008	42	M	Married	Yes	Basic	Government work	6	None	NHIS	Anti Hypertensive Medication	6	Strongly agree	Agree	Uncertain	Uncertain	Disagree	Agree	Disagree	Strongly agree	Agree	Strongly agree	Agree	Agree	Uncertain	Agree	Uncertain	Agree	Strongly agree	Strongly agree	Agree	Strongly Disagree	Uncertain	Occationally	Rarely	Sometimes	Sometimes	Average Chance	A good chance	Average Chance	A slight chance	Completely certain	Completely certain	Yes	No	No	No	Yes	No	Yes
hpt009	55	M	Married	Yes	Tertiary	Government work	6	Diabetes	NHIS	Anti Hypertensive Medication	6	Strongly agree	Agree	Agree	Uncertain	Agree	Uncertain	Agree	Strongly agree	Agree	Strongly agree	Agree	Agree	Uncertain	Agree	Uncertain	Agree	Strongly agree	Strongly agree	Agree	Strongly Disagree	Agree	Occationally	Rarely	Sometimes	Frequently	Average Chance	A good chance	Average Chance	A slight chance	Completely certain	Completely certain	No	No	No	No	Yes	No	Yes
hpt010	57	M	Married	Yes	Tertiary	Government work	7	Diabetes	NHIS	Anti Hypertensive Medication	3	Agree	Uncertain	Agree	Agree	Uncertain	Agree	Uncertain	Agree	Uncertain	Agree	Uncertain	Agree	Uncertain	Agree	Strongly agree	Agree	Strongly agree	Agree	Uncertain	Disagree	Strongly Disagree	Rarely	Occationally	Sometimes	Occationally	A slight chance	Average Chance	A good chance	Average Chance	Averae Chance	A slight chance	No	No	Yes	Yes	No	No	No
hpt011	49	F	Married	No	Basic	Student	3	Diabetes	NHIS	Anti Hypertensive Medication	5	Disagree	Agree	Disagree	Strongly Disagree	Strongly Disagree	Disagree	Agree	Strongly agree	Agree	Strongly agree	Agree	Strongly agree	Agree	Strongly agree	Agree	Uncertain	Agree	Disagree	Disagree	Disagree	Strongly Disagree	55	Sometimes	Sometimes	Sometimes	Completely certain	A good chance	Completely certain	A good chance	Completely certain	A good chance	No	No	Yes	No	Yes	Yes	No
hpt012	43	M	Married	Yes	Tertiary	Private work	5	Renal Failure	Private	Anti Hypertensive Medication	5	Disagree	Agree	Disagree	Strongly Disagree	Strongly Disagree	Disagree	Agree	Strongly agree	Agree	Strongly agree	Agree	Strongly agree	Agree	Strongly agree	Agree	Uncertain	Agree	Disagree	Disagree	Disagree	Strongly Disagree	Frequently	Sometimes	Sometimes	Sometimes	Completely certain	A good chance	Completely certain	A good chance	Completely certain	A good chance	No	No	Yes	No	Yes	Yes	No
hpt013	56	M	Seperated/Widowed	Yes	Basic	Government work	5	Renal Failure	NHIS	Anti Hypertensive Medication	5	Agree	Strongly agree	Agree	Strongly agree	Agree	Agree	Strongly agree	Strongly agree	Agree	Strongly agree	Agree	Strongly agree	Agree	Strongly agree	Agree	Uncertain	Strongly agree	Disagree	Disagree	Disagree	Strongly Disagree	Sometimes	Frequently	Sometimes	Rarely	Average Chance	A good chance	Completely certain	A good chance	Completely certain	Average Chance	No	No	No	Yes	Yes	No	No
hpt014	68	M	Seperated/Widowed	Yes	Secondary/Vocational	Student	5	Diabetes	NHIS	Anti Hypertensive Medication	5	Agree	Strongly agree	Agree	Uncertain	Agree	Agree	Strongly agree	Strongly agree	Agree	Strongly agree	Agree	Strongly agree	Agree	Strongly agree	Agree	Uncertain	Strongly agree	Disagree	Disagree	Disagree	Strongly Disagree	Sometimes	Frequently	Occationally	Rarely	Average Chance	A good chance	Completely certain	A good chance	Completely certain	Completely certain	No	No	No	No	Yes	Yes	No
hpt015	51	M	Married	Yes	Tertiary	Private work	7	None	NHIS	Anti Hypertensive Medication	5	Agree	Strongly agree	Agree	Agree	Uncertain	Uncertain	Strongly agree	Agree	Strongly agree	Strongly agree	Agree	Strongly agree	Agree	Disagree	Disagree	Disagree	Agree	Disagree	Agree	Agree	Uncertain	Occationally	Sometimes	Frequently	Frequently	A good chance	Average Chance	A good chance	A good chance	A good chance	Average Chance	No	No	No	No	Yes	No	No
hpt016	53	F	Married	Yes	Tertiary	Student	2	Heart Failure	NHIS	Anti Hypertensive Medication	5	Disagree	Agree	Disagree	Strongly Disagree	Strongly Disagree	Disagree	Agree	Strongly agree	Agree	Strongly agree	Agree	Strongly agree	Agree	Strongly agree	Agree	Uncertain	Agree	Disagree	Disagree	Disagree	Strongly Disagree	Frequently	Sometimes	Sometimes	Sometimes	Completely certain	A good chance	Completely certain	A good chance	Completely certain	A good chance	No	No	Yes	No	Yes	Yes	No
hpt017	50	M	Married	Yes	Tertiary	Private work	12	Heart Failure	NHIS	Anti Hypertensive Medication	5	Disagree	Agree	Disagree	Strongly Disagree	Strongly Disagree	Disagree	Agree	Strongly agree	Agree	Strongly agree	Agree	Strongly agree	Agree	Strongly agree	Agree	Uncertain	Agree	Disagree	Disagree	Disagree	Strongly Disagree	Frequently	Sometimes	Sometimes	Sometimes	Completely certain	A good chance	Completely certain	A good chance	Completely certain	A good chance	No	No	Yes	No	Yes	Yes	No
hpt018	60	M	Married	Yes	Basic	Government work	3	Renal Failure	NHIS	Anti Hypertensive Medication	12	Disagree	Disagree	Agree	Disagree	Strongly agree	Agree	Agree	Strongly agree	Agree	Agree	Strongly agree	Agree	Strongly agree	Agree	Uncertain	Agree	Agree	Disagree	Agree	Disagree	Agree	Never	Occationally	Sometimes	Never	Average Chance	A good chance	Average Chance	A good chance	Completely certain	Completely certain	Yes	No	Yes	Yes	Yes	No	No
hpt019	72	M	Married	Yes	Secondary/Vocational	Private work	5	Diabetes	None	Anti Hypertensive Medication	4	Strongly agree	Strongly agree	Uncertain	Strongly agree	Strongly agree	Strongly agree	Agree	Strongly agree	Strongly agree	Strongly agree	Strongly agree	Strongly agree	Strongly agree	Strongly agree	Agree	Uncertain	Agree	Agree	Agree	Uncertain	Agree	Frequently	Sometimes	Frequently	Frequently	Completely certain	Completely certain	Completely certain	Completely certain	Completely certain	Completely certain	No	No	No	No	Yes	No	Yes
hpt020	68	M	Married	Yes	Tertiary	Government work	5	Diabetes	NHIS	Anti Hypertensive Medication	10	Strongly agree	Agree	Uncertain	Disagree	Agree	Agree	Agree	Strongly agree	Strongly agree	Agree	Strongly agree	Strongly agree	Strongly agree	Agree	Disagree	Agree	Agree	Strongly agree	Strongly agree	Disagree	Strongly agree	Frequently	Occationally	Frequently	Frequently	Average Chance	A good chance	Completely certain	Completely certain	Completely certain	Completely certain	No	No	No	No	Yes	No	No
hpt021	56	M	Seperated/Widowed	Yes	Non-formal	Farmer	5	Diabetes	NHIS	Anti Hypertensive Medication	10	Disagree	Disagree	Uncertain	Disagree	Agree	Agree	Disagree	Strongly agree	Agree	Agree	Strongly agree	Agree	Strongly agree	Agree	Strongly agree	Uncertain	Disagree	Disagree	Strongly Disagree	Uncertain	Uncertain	Frequently	Sometimes	Occationally	Never	A good chance	Completely certain	Average Chance	A good chance	No chance at all	Completely certain	No	No	No	No	Yes	Yes	No
hpt022	56	M	Married	Yes	Non-formal	Private work	5	Renal Failure	NHIS	Anti Dibetic and Hypertensive medication	3	Agree	Agree	Disagree	Agree	Agree	Agree	Strongly agree	Disagree	Agree	Strongly agree	Agree	Strongly agree	Strongly agree	Strongly agree	Strongly agree	Agree	Strongly Disagree	Disagree	Disagree	Strongly Disagree	Strongly Disagree	Frequently	Rarely	Sometimes	Never	A good chance	Completely certain	A good chance	Average Chance	A good chance	A good chance	No	No	No	No	Yes	Yes	No
hpt023	63	M	Married	Yes	Secondary/Vocational	Private work	5	Renal Failure	NHIS	Anti Dibetic and Hypertensive medication	4	Strongly agree	Disagree	Agree	Disagree	Agree	Uncertain	Agree	Strongly agree	Agree	Strongly agree	Agree	Agree	Uncertain	Agree	Uncertain	Agree	Agree	Strongly agree	Strongly agree	Strongly Disagree	Agree	Frequently	Sometimes	Sometimes	Frequently	Completely certain	A slight chance	A good chance	A good chance	A good chance	Completely certain	No	Yes	Yes	No	Yes	No	Yes
hpt024	58	M	Married	Yes	Tertiary	Private work	5	Renal Failure	NHIS	Anti Hypertensive Medication	5	Strongly Disagree	Disagree	Disagree	Uncertain	Agree	Agree	Agree	Strongly agree	Strongly agree	Strongly agree	Agree	Agree	Strongly agree	Strongly agree	Uncertain	Disagree	Agree	Agree	Agree	Agree	Strongly agree	Sometimes	Occationally	Rarely	Sometimes	A good chance	Average Chance	A slight chance	A good chance	A good chance	Completely certain	No	No	No	Yes	Yes	No	No
hpt025	70	M	Seperated/Widowed	Yes	Basic	Farmer	5	Diabetes	NHIS	Anti Hypertensive Medication	3	Strongly agree	Disagree	Uncertain	Agree	Strongly agree	Agree	Disagree	Strongly agree	Strongly agree	Agree	Strongly agree	Agree	Agree	Uncertain	Disagree	Agree	Uncertain	Disagree	Uncertain	Disagree	Agree	Never	Occationally	Sometimes	Occationally	Average Chance	A good chance	A good chance	Average Chance	A good chance	Average Chance	Yes	No	No	Yes	Yes	No	Yes
hpt026	56	F	Seperated/Widowed	Yes	Basic	Private work	4	Heart Failure	NHIS	Anti Dibetic and Hypertensive medication	9	Strongly Disagree	Strongly Disagree	Disagree	Uncertain	Uncertain	Uncertain	Strongly agree	Disagree	Disagree	Strongly agree	Strongly agree	Strongly agree	Strongly agree	Strongly agree	Strongly agree	Strongly agree	Strongly agree	Disagree	Strongly Disagree	Disagree	Strongly Disagree	Occationally	Occationally	Occationally	Never	A good chance	Completely certain	Average Chance	A good chance	Completely certain	Completely certain	Yes	Yes	No	No	Yes	No	No
hpt027	70	M	Married	Yes	Basic	Private work	12	Diabetes	None	Anti Hypertensive Medication	6	Uncertain	Agree	Agree	Uncertain	Disagree	Agree	Uncertain	Strongly agree	Strongly agree	Strongly agree	Strongly agree	Strongly agree	Strongly agree	Disagree	Disagree	Disagree	Agree	Uncertain	Agree	Disagree	Disagree	Occationally	Sometimes	Frequently	Never	Average Chance	A good chance	A good chance	Average Chance	Completely certain	Completely certain	Yes	No	No	Yes	Yes	No	No
hpt028	50	M	Married	Yes	Tertiary	Farmer	10	None	NHIS	Anti Hypertensive Medication	10	Disagree	Agree	Disagree	Strongly Disagree	Strongly Disagree	Disagree	Agree	Strongly agree	Agree	Strongly agree	Agree	Strongly agree	Agree	Strongly agree	Agree	Uncertain	Agree	Disagree	Disagree	Disagree	Strongly Disagree	Frequently	Sometimes	Sometimes	Sometimes	Completely certain	A good chance	Completely certain	A good chance	Completely certain	A good chance	No	No	Yes	No	Yes	Yes	Yes
hpt029	46	M	Married	#NULL!	Secondary/Vocational	Farmer	3	None	NHIS	Anti Hypertensive Medication	11	Disagree	Agree	Disagree	Strongly Disagree	Strongly Disagree	Disagree	Agree	Strongly agree	Agree	Strongly agree	Agree	Strongly agree	Agree	Strongly agree	Agree	Uncertain	Agree	Disagree	Disagree	Disagree	Strongly Disagree	Frequently	Sometimes	Sometimes	Sometimes	Completely certain	A good chance	Completely certain	A good chance	73	A good chance	No	No	Yes	No	Yes	Yes	No
hpt030	73	F	Married	Yes	Basic	Farmer	4	None	NHIS	Anti Hypertensive Medication	5	Agree	Uncertain	Agree	Disagree	Strongly agree	Strongly agree	Agree	Strongly agree	Strongly agree	Strongly agree	Agree	Agree	Agree	Agree	Agree	Agree	Disagree	Agree	Agree	Agree	Disagree	Sometimes	Occationally	Sometimes	Never	A good chance	Average Chance	Average Chance	Average Chance	A good chance	A good chance	No	Yes	Yes	Yes	Yes	No	Yes
hpt031	56	M	Married	Yes	Basic	Farmer	5	None	NHIS	Anti Hypertensive Medication	10	Strongly agree	Agree	Uncertain	Disagree	Agree	Uncertain	Agree	Strongly agree	Strongly agree	Strongly agree	Agree	Agree	Uncertain	Agree	Uncertain	Agree	Agree	Strongly agree	Agree	Disagree	Agree	Occationally	Rarely	Sometimes	Sometimes	Average Chance	A good chance	Average Chance	A slight chance	Completely certain	Completely certain	Yes	No	No	No	Yes	No	Yes
hpt032	49	M	Single	No	Basic	Private work	3	None	NHIS	Anti Hypertensive Medication	10	Disagree	Agree	Disagree	Agree	Agree	Disagree	Agree	Disagree	Disagree	Disagree	Disagree	Disagree	Disagree	Disagree	Disagree	Disagree	Disagree	Agree	Agree	Agree	Agree	Rarely	Never	Never	Never	No chance at all	A slight chance	A slight chance	A slight chance	No chance at all	A slight chance	Yes	Yes	Yes	Yes	Yes	Yes	Yes
hpt033	52	F	Cohabitating	No	Basic	Private work	10	Diabetes	NHIS	Anti Dibetic and Hypertensive medication	3	Agree	Strongly agree	Agree	Uncertain	Uncertain	#NULL!	Strongly agree	Strongly agree	Agree	Strongly agree	Agree	Strongly agree	Agree	Strongly agree	Agree	Uncertain	Strongly agree	Disagree	Disagree	Disagree	Strongly Disagree	Sometimes	Frequently	Sometimes	Rarely	Average Chance	A good chance	Completely certain	A good chance	Completely certain	Completely certain	No	No	No	No	Yes	Yes	Yes
hpt034	37	M	Married	Yes	Non-formal	Private work	11	Diabetes	NHIS	Anti Dibetic and Hypertensive medication	4	Disagree	Strongly Disagree	Disagree	Agree	Disagree	Disagree	Agree	Agree	Strongly agree	Strongly agree	Agree	Agree	Strongly agree	Agree	Strongly agree	Uncertain	Disagree	Disagree	Disagree	Strongly Disagree	Disagree	Sometimes	Occationally	Frequently	Frequently	Average Chance	Completely certain	A good chance	A good chance	Completely certain	Completely certain	No	No	No	No	Yes	Yes	No
hpt035	36	M	Married	Yes	Non-formal	Government work	5	Diabetes	#NULL!	Anti Hypertensive Medication	5	Disagree	Strongly Disagree	Disagree	Agree	Disagree	Disagree	Agree	Agree	Strongly agree	Strongly agree	Agree	Strongly agree	Agree	Strongly agree	Agree	Uncertain	Disagree	Disagree	Disagree	Strongly Disagree	Disagree	Sometimes	Occationally	Frequently	Frequently	Average Chance	Completely certain	A good chance	A good chance	Completely certain	Completely certain	No	No	No	No	Yes	Yes	No
hpt036	61	M	Married	Yes	Tertiary	Private work	4	Diabetes	Private	Anti Hypertensive Medication	3	Agree	Strongly agree	Agree	Uncertain	Agree	Agree	Strongly agree	Strongly agree	Agree	Strongly agree	Agree	Strongly agree	Agree	Strongly agree	Agree	Uncertain	Strongly agree	Disagree	Disagree	Disagree	Strongly Disagree	Sometimes	Frequently	Occationally	Rarely	Average Chance	A good chance	Completely certain	A good chance	Completely certain	Completely certain	No	No	No	No	Yes	Yes	No
hpt037	64	M	Married	Yes	Basic	Private work	5	Diabetes	NHIS	Anti Hypertensive Medication	6	Disagree	Agree	Agree	Disagree	Strongly agree	Agree	Agree	Uncertain	Strongly agree	Strongly agree	Strongly agree	Strongly agree	Strongly agree	Agree	Strongly agree	Agree	Strongly Disagree	Disagree	Disagree	Uncertain	Uncertain	Rarely	Never	Sometimes	Never	A good chance	A good chance	A good chance	A good chance	A good chance	Completely certain	No	No	No	No	Yes	Yes	No
hpt038	28	M	Single	Yes	Secondary/Vocational	Government work	6	Renal Failure	NHIS	Anti Dibetic and Hypertensive medication	9	Strongly agree	Strongly agree	Strongly agree	Agree	Strongly agree	Agree	Strongly agree	Strongly agree	Strongly agree	Strongly agree	Strongly agree	Strongly agree	Strongly agree	Agree	Strongly agree	Uncertain	Strongly Disagree	Disagree	Disagree	Strongly Disagree	Strongly Disagree	Frequently	Never	Occationally	Never	Average Chance	A good chance	Completely certain	A good chance	Completely certain	Completely certain	Yes	Yes	No	No	Yes	Yes	No
hpt039	50	M	Married	Yes	Secondary/Vocational	Government work	5	Renal Failure	NHIS	Anti Dibetic and Hypertensive medication	10	Disagree	Agree	Disagree	Strongly Disagree	Strongly Disagree	Disagree	Agree	Strongly agree	Agree	Strongly agree	Agree	Strongly agree	Agree	Strongly agree	Agree	Uncertain	Agree	Disagree	Disagree	Disagree	Strongly Disagree	Frequently	Sometimes	Sometimes	Sometimes	Completely certain	A good chance	Completely certain	A good chance	Completely certain	A good chance	No	No	#NULL!	No	Yes	Yes	No
hpt040	64	M	Married	Yes	Secondary/Vocational	Private work	8	Diabetes	NHIS	Anti Hypertensive Medication	10	Agree	Strongly agree	Agree	Uncertain	Agree	Agree	Strongly agree	Strongly agree	Agree	Strongly agree	Agree	Strongly agree	Agree	Strongly agree	Agree	Uncertain	Strongly agree	Disagree	Disagree	Disagree	Strongly Disagree	Sometimes	Frequently	Occationally	Rarely	Average Chance	A good chance	Completely certain	A good chance	Completely certain	Completely certain	No	No	No	No	Yes	Yes	No
hpt041	50	M	Married	Yes	Tertiary	Unemployed	14	Heart Failure	Private	Anti Hypertensive Medication	11	Disagree	Agree	Disagree	Strongly Disagree	Strongly Disagree	Disagree	Agree	Strongly agree	Agree	Strongly agree	Agree	Strongly agree	Agree	Strongly agree	Agree	Uncertain	Agree	Disagree	Disagree	Disagree	Strongly Disagree	Frequently	Sometimes	Sometimes	Sometimes	Completely certain	A good chance	Completely certain	A good chance	Completely certain	A good chance	No	No	Yes	No	Yes	Yes	No
hpt042	50	M	Married	Yes	Basic	Private work	5	Heart Failure	NHIS	Anti Hypertensive Medication	5	Disagree	Agree	Disagree	Agree	Agree	Disagree	Agree	Disagree	Disagree	Disagree	Disagree	Disagree	Disagree	Disagree	Disagree	Disagree	Disagree	Agree	Agree	Agree	Agree	Rarely	Never	Never	Never	No chance at all	A slight chance	A slight chance	A slight chance	No chance at all	A slight chance	Yes	Yes	Yes	Yes	Yes	Yes	Yes
hpt043	64	M	Married	Yes	Secondary/Vocational	Private work	5	None	Private	Anti Hypertensive Medication	3.5	Agree	Strongly agree	Uncertain	Agree	Strongly agree	Agree	Agree	Strongly agree	Strongly agree	Strongly agree	Agree	Strongly agree	Strongly agree	Agree	Uncertain	Disagree	Agree	Strongly agree	Agree	Uncertain	Disagree	Rarely	Sometimes	Sometimes	Rarely	A good chance	A good chance	A good chance	Average Chance	A good chance	Completely certain	Yes	No	No	Yes	Yes	No	Yes
hpt044	47	M	Married	Yes	Basic	Private work	12	None	NHIS	Anti Hypertensive Medication	5	Strongly agree	Agree	Agree	Agree	Agree	Agree	Strongly agree	Agree	Strongly agree	Agree	Strongly agree	Agree	Agree	Agree	Agree	Agree	Uncertain	Disagree	Strongly Disagree	Disagree	Strongly Disagree	Sometimes	Occationally	Sometimes	Never	A good chance	Completely certain	Completely certain	A good chance	Completely certain	Completely certain	Yes	Yes	Yes	Yes	No	No	Yes
hpt045	50	M	Seperated/Widowed	Yes	Tertiary	Private work	5	None	Private	Anti Hypertensive Medication	7	Strongly agree	Disagree	Agree	Uncertain	Disagree	Agree	Strongly agree	Strongly agree	Strongly agree	Strongly agree	Strongly agree	Agree	Strongly agree	Strongly agree	Agree	Agree	Agree	Agree	Agree	Uncertain	Agree	Frequently	Sometimes	Frequently	Frequently	44	Average Chance	Average Chance	Average Chance	Averae Chance	Average Chance	Yes	No	No	No	Yes	No	Yes
hpt046	44	M	Single	No	Tertiary	Government work	14	None	NHIS	Anti Hypertensive Medication	3	Strongly agree	Agree	Uncertain	Disagree	Agree	Agree	Agree	Strongly agree	Strongly agree	Agree	Strongly agree	Strongly agree	Strongly agree	Agree	Disagree	Uncertain	Uncertain	Agree	Agree	Disagree	Strongly agree	Frequently	Occationally	Frequently	Frequently	Average Chance	A good chance	Completely certain	Completely certain	Completely certain	Completely certain	No	No	No	No	Yes	No	No
hpt047	57	M	Married	Yes	Basic	Private work	5	None	NHIS	Anti Hypertensive Medication	5	Disagree	Agree	Disagree	Agree	Disagree	Disagree	Agree	Agree	Strongly agree	Strongly agree	Agree	Agree	Strongly agree	Agree	Strongly agree	Uncertain	Agree	Disagree	Disagree	Disagree	Strongly Disagree	Never	Sometimes	Occationally	Never	A good chance	Average Chance	A good chance	Completely certain	Completely certain	Completely certain	No	No	No	No	Yes	Yes	No
hpt048	48	M	Married	Yes	Tertiary	Government work	5	None	NHIS	Anti Hypertensive Medication	5	Strongly agree	Disagree	Agree	Disagree	Agree	Uncertain	Agree	Strongly agree	Agree	Strongly agree	Agree	Agree	Uncertain	Agree	Uncertain	Agree	Agree	Strongly agree	Strongly agree	Strongly Disagree	Agree	Frequently	Sometimes	Sometimes	Frequently	Completely certain	A slight chance	A good chance	A good chance	A good chance	Completely certain	No	Yes	Yes	No	Yes	No	No
hpt049	40	M	Single	Yes	Tertiary	Student	5	None	NHIS	Anti Hypertensive Medication	5	Strongly agree	Disagree	Agree	Disagree	Agree	Uncertain	Agree	Strongly agree	Agree	Strongly agree	Agree	Agree	Uncertain	Agree	Uncertain	Agree	Agree	Strongly agree	Strongly agree	Strongly Disagree	Agree	Occationally	Sometimes	Sometimes	Frequently	Completely certain	A slight chance	A good chance	A good chance	A good chance	Completely certain	No	Yes	Yes	No	Yes	No	Yes
hpt050	47	M	Married	Yes	Basic	Private work	7	None	NHIS	Anti Hypertensive Medication	7	Disagree	Strongly agree	Uncertain	Agree	Agree	Strongly agree	Agree	Strongly agree	Strongly agree	Strongly agree	Agree	Strongly agree	Agree	Uncertain	Uncertain	Agree	Agree	Agree	Agree	Uncertain	Agree	Occationally	Sometimes	Never	Never	Average Chance	A slight chance	A good chance	A good chance	A good chance	Completely certain	Yes	No	No	Yes	Yes	No	Yes
hpt051	29	F	Married	Yes	Secondary/Vocational	Student	2	None	NHIS	Anti Hypertensive Medication	2	Strongly agree	Agree	Agree	Agree	Strongly agree	Agree	Agree	Strongly agree	Agree	Strongly agree	Agree	Strongly agree	Agree	Agree	Agree	Agree	Strongly Disagree	Disagree	Disagree	Uncertain	Uncertain	Rarely	Frequently	Frequently	Never	A good chance	Completely certain	A good chance	Completely certain	A good chance	Completely certain	No	No	No	No	Yes	Yes	No
hpt052	57	M	Married	Yes	Tertiary	Private work	2	None	NHIS	Anti Hypertensive Medication	2	Disagree	Agree	Disagree	Strongly Disagree	Strongly Disagree	Disagree	Agree	Strongly agree	Agree	Strongly agree	Agree	Strongly agree	Agree	Strongly agree	Agree	Uncertain	Agree	Disagree	Disagree	Disagree	Strongly Disagree	Frequently	Sometimes	Sometimes	Sometimes	Completely certain	A good chance	Completely certain	A good chance	Completely certain	A good chance	No	No	Yes	No	Yes	Yes	No
hpt053	41	M	Married	Yes	Tertiary	Government work	3	None	Private	Anti Hypertensive Medication	3	Disagree	Agree	Disagree	Strongly Disagree	Strongly Disagree	Disagree	Agree	Strongly agree	Agree	Strongly agree	Agree	Strongly agree	Agree	Strongly agree	Agree	Uncertain	Agree	Disagree	Disagree	Disagree	Strongly Disagree	Frequently	Sometimes	Sometimes	Sometimes	Completely certain	A good chance	Completely certain	A good chance	Completely certain	A good chance	No	No	Yes	No	Yes	Yes	No
hpt054	56	M	Cohabitating	No	Basic	Private work	5	None	NHIS	Anti Hypertensive Medication	5	Disagree	Agree	Disagree	Agree	Agree	Disagree	Agree	Disagree	Disagree	Disagree	Disagree	Disagree	Disagree	Disagree	Disagree	Disagree	Disagree	Agree	Agree	Agree	Agree	Rarely	Never	Never	Never	No chance at all	A slight chance	A slight chance	A slight chance	No chance at all	A slight chance	Yes	Yes	Yes	Yes	Yes	Yes	Yes
hpt055	50	M	Married	Yes	Tertiary	Unemployed	5	None	NHIS	Anti Hypertensive Medication	5	Disagree	Agree	Disagree	Agree	Agree	Disagree	Agree	Disagree	Disagree	Disagree	Disagree	Disagree	Disagree	Disagree	Disagree	Disagree	Disagree	Agree	Agree	Agree	Agree	Rarely	Never	Never	Never	No chance at all	A slight chance	A slight chance	A slight chance	No chance at all	A slight chance	Yes	Yes	Yes	Yes	Yes	Yes	Yes
hpt056	60	M	Married	Yes	Non-formal	Farmer	5	None	NHIS	Anti Hypertensive Medication	5	Disagree	Agree	Disagree	Agree	Agree	Disagree	Agree	Disagree	Disagree	Disagree	Disagree	Disagree	Disagree	Disagree	Disagree	Disagree	Disagree	Agree	Agree	Agree	Agree	Rarely	Never	Never	Never	No chance at all	A slight chance	A slight chance	A slight chance	No chance at all	A slight chance	Yes	Yes	Yes	Yes	Yes	Yes	Yes
hpt057	49	M	Cohabitating	No	Non-formal	Private work	5	None	NHIS	Anti Hypertensive Medication	5	Disagree	Agree	Disagree	Agree	Agree	Disagree	Agree	Disagree	Disagree	Disagree	Disagree	Disagree	Disagree	Disagree	Disagree	Disagree	Disagree	Agree	Agree	Agree	Agree	Rarely	Never	Never	Never	No chance at all	A slight chance	A slight chance	A slight chance	No chance at all	A slight chance	Yes	Yes	Yes	Yes	Yes	Yes	Yes
hpt058	47	M	Single	Yes	Secondary/Vocational	Private work	5	Diabetes	NHIS	Anti Hypertensive Medication	5	Disagree	Agree	Disagree	Agree	Agree	Disagree	Agree	Disagree	Disagree	Disagree	Disagree	Disagree	Disagree	Disagree	Disagree	Disagree	Disagree	Agree	Agree	Agree	Agree	Rarely	Never	Never	Never	No chance at all	A slight chance	A slight chance	A slight chance	No chance at all	A slight chance	Yes	Yes	Yes	Yes	Yes	Yes	Yes
hpt059	55	M	Married	Yes	Secondary/Vocational	Private work	5	Renal Failure	NHIS	Anti Hypertensive Medication	5	Disagree	Agree	Disagree	Agree	Agree	Disagree	Agree	Disagree	Disagree	Disagree	Disagree	Disagree	Disagree	Disagree	Disagree	Disagree	Disagree	Agree	Agree	Agree	Agree	Rarely	Never	Never	Never	No chance at all	A slight chance	A slight chance	A slight chance	No chance at all	A slight chance	Yes	Yes	Yes	Yes	Yes	Yes	Yes
hpt060	52	M	Single	Yes	Non-formal	Farmer	5	None	NHIS	Anti Hypertensive Medication	5	Disagree	Agree	Disagree	Agree	Agree	Disagree	Agree	Disagree	Disagree	Disagree	Disagree	Disagree	Disagree	Disagree	Disagree	Disagree	Disagree	Agree	Agree	Agree	Agree	Rarely	Never	Never	Never	No chance at all	A slight chance	A slight chance	A slight chance	No chance at all	A slight chance	Yes	Yes	Yes	Yes	Yes	Yes	Yes
hpt061	47	M	Married	Yes	Secondary/Vocational	Private work	12	None	NHIS	Anti Hypertensive Medication	12	Disagree	Strongly Disagree	Disagree	Agree	Disagree	Disagree	Agree	Agree	Strongly agree	Strongly agree	Agree	Agree	Strongly agree	Agree	Strongly agree	Uncertain	Disagree	Disagree	Disagree	Strongly Disagree	Disagree	Sometimes	Occationally	Frequently	Frequently	Average Chance	Completely certain	A good chance	A good chance	Completely certain	Completely certain	No	No	No	No	Yes	Yes	No
hpt062	50	M	Married	Yes	Secondary/Vocational	Private work	4	None	Private	Anti Hypertensive Medication	4	Disagree	Agree	Disagree	Strongly Disagree	Strongly Disagree	Disagree	Agree	Strongly agree	Agree	Strongly agree	Agree	Strongly agree	Agree	Strongly agree	Agree	Uncertain	Strongly agree	Disagree	Disagree	Disagree	Strongly Disagree	Frequently	Sometimes	Sometimes	Sometimes	Completely certain	A good chance	Completely certain	A good chance	Completely certain	A good chance	No	No	Yes	Yes	No	No	Yes
hpt063	56	M	Seperated/Widowed	No	Non-formal	Farmer	10	None	NHIS	Anti Hypertensive Medication	10	Agree	Uncertain	Agree	Disagree	Strongly agree	Strongly agree	Agree	Strongly agree	Strongly agree	Strongly agree	Agree	Agree	Agree	Agree	Agree	Agree	Disagree	Agree	Agree	Agree	Disagree	Sometimes	Occationally	Sometimes	Never	A good chance	Average Chance	Average Chance	Average Chance	A slight chance	A slight chance	Yes	Yes	Yes	Yes	Yes	No	Yes
hpt064	56	M	Seperated/Widowed	Yes	Basic	Farmer	10	Diabetes	None	Anti Hypertensive Medication	10	Agree	Uncertain	Agree	Disagree	Strongly agree	Strongly agree	Strongly agree	Agree	Strongly agree	Strongly agree	Agree	Agree	Agree	Agree	Agree	Agree	Uncertain	Agree	Agree	Agree	Disagree	Sometimes	Occationally	Sometimes	Never	A good chance	Average Chance	Average Chance	Average Chance	A good chance	A good chance	No	Yes	Yes	Yes	Yes	No	Yes
hpt065	63	M	Married	Yes	Basic	Farmer	3	Diabetes	NHIS	Anti Dibetic and Hypertensive medication	3	Agree	Uncertain	Agree	Disagree	Strongly agree	Strongly agree	Agree	Strongly agree	Strongly agree	Strongly agree	Agree	Agree	Agree	Agree	Agree	Agree	Disagree	Agree	Agree	Agree	Disagree	Sometimes	Occationally	Sometimes	Never	A good chance	Average Chance	Average Chance	Average Chance	A good chance	A good chance	Yes	Yes	Yes	Yes	Yes	No	Yes
hpt066	63	M	Married	Yes	Tertiary	Farmer	4	Diabetes	NHIS	Anti Dibetic and Hypertensive medication	4	Strongly agree	Agree	Uncertain	Disagree	Agree	Uncertain	Agree	Strongly agree	Agree	Strongly agree	Agree	Agree	Uncertain	Agree	Uncertain	Agree	Strongly agree	Strongly agree	Agree	Uncertain	Agree	Occationally	Rarely	Occationally	Occationally	Average Chance	A good chance	Average Chance	A slight chance	Completely certain	Completely certain	No	No	No	No	Yes	No	Yes
hpt067	56	M	Seperated/Widowed	Yes	Basic	Farmer	5	None	NHIS	Anti Hypertensive Medication	5	Strongly agree	Agree	Uncertain	Disagree	Agree	Uncertain	Agree	Strongly agree	Agree	Strongly agree	Agree	Agree	Uncertain	Agree	Uncertain	Agree	Strongly agree	Strongly agree	Agree	Uncertain	Agree	Occationally	Rarely	Sometimes	Sometimes	Average Chance	A good chance	Average Chance	A slight chance	Completely certain	Completely certain	Yes	No	No	No	Yes	No	Yes
hpt068	50	M	Married	Yes	Tertiary	Private work	3	None	NHIS	Anti Hypertensive Medication	3	Strongly agree	Agree	Uncertain	Disagree	Agree	Uncertain	Strongly agree	Agree	Agree	Agree	Agree	Uncertain	Disagree	Agree	Uncertain	Agree	Strongly agree	Strongly agree	Agree	Strongly Disagree	Agree	Occationally	Rarely	Frequently	Frequently	Average Chance	A good chance	Average Chance	A slight chance	Completely certain	Completely certain	No	No	No	No	Yes	No	Yes
hpt069	47	M	Married	Yes	Secondary/Vocational	Farmer	6	None	None	Anti Hypertensive Medication	6	Strongly agree	Agree	Uncertain	Uncertain	Agree	Uncertain	Strongly agree	Agree	Agree	Strongly agree	Agree	Agree	Uncertain	Agree	Uncertain	Agree	Strongly agree	Strongly agree	Agree	Uncertain	Strongly agree	Occationally	Rarely	Sometimes	Sometimes	Average Chance	A good chance	Average Chance	A slight chance	Completely certain	Completely certain	No	No	No	No	Yes	No	Yes
hpt070	48	M	Married	Yes	Basic	Farmer	9	Diabetes	Private	Anti Dibetic and Hypertensive medication	9	Agree	Uncertain	Uncertain	Agree	Disagree	Disagree	Agree	Strongly agree	Agree	Strongly agree	Strongly agree	Agree	Strongly agree	Strongly agree	Agree	Agree	Agree	Agree	Agree	Uncertain	Agree	Frequently	Sometimes	Frequently	Frequently	A good chance	Completely certain	Completely certain	A good chance	Completely certain	Completely certain	Yes	No	No	No	Yes	No	Yes
hpt071	70	M	Married	No	Basic	Farmer	10	Diabetes	NHIS	Anti Dibetic and Hypertensive medication	10	Agree	Strongly agree	Agree	Uncertain	Agree	Agree	Strongly agree	Strongly agree	Agree	Strongly agree	Agree	Strongly agree	Agree	Strongly agree	Agree	Uncertain	Strongly agree	Disagree	Disagree	Disagree	Strongly Disagree	Sometimes	Frequently	Occationally	Rarely	Average Chance	A good chance	Completely certain	A good chance	Completely certain	Completely certain	No	No	No	No	Yes	Yes	No
hpt072	65	M	Married	Yes	Tertiary	Private work	10	Diabetes	NHIS	Anti Hypertensive Medication	10	Agree	Strongly agree	Agree	Uncertain	Agree	Agree	Strongly agree	Strongly agree	Agree	Strongly agree	Agree	Strongly agree	Agree	Strongly agree	Agree	Uncertain	Strongly agree	Disagree	Disagree	Disagree	Strongly Disagree	Sometimes	Frequently	Occationally	Rarely	Average Chance	A good chance	Completely certain	A good chance	Completely certain	Completely certain	No	No	No	No	Yes	Yes	No
hpt073	70	M	Married	Yes	Basic	Private work	11	Diabetes	NHIS	Anti Hypertensive Medication	11	Disagree	Agree	Agree	Strongly agree	Agree	Uncertain	Agree	Strongly agree	Agree	Strongly agree	Agree	Strongly agree	Agree	Strongly agree	Agree	Agree	Strongly agree	Disagree	Disagree	Strongly Disagree	Disagree	Sometimes	Sometimes	Sometimes	Never	Average Chance	Completely certain	Average Chance	Completely certain	A good chance	Completely certain	No	No	No	No	Yes	Yes	No
hpt074	47	M	Married	Yes	Tertiary	Government work	5	None	Private	Anti Hypertensive Medication	5	Disagree	Agree	Disagree	Agree	Agree	Agree	Agree	Strongly agree	Disagree	Strongly agree	Agree	Strongly agree	Agree	Strongly agree	Agree	Uncertain	Agree	Strongly Disagree	Disagree	Disagree	Disagree	Frequently	Occationally	Sometimes	Frequently	Average Chance	Average Chance	Completely certain	A good chance	A good chance	Completely certain	No	No	No	Yes	Yes	Yes	No
hpt075	39	M	Married	Yes	Secondary/Vocational	Private work	4	None	NHIS	Anti Hypertensive Medication	3.5	Disagree	Uncertain	Disagree	Uncertain	Disagree	Uncertain	Agree	Disagree	Strongly agree	Agree	Strongly agree	Agree	Strongly agree	Agree	Strongly agree	Uncertain	Strongly agree	Strongly Disagree	Disagree	Agree	Disagree	Sometimes	Occationally	Sometimes	Never	Average Chance	A good chance	Completely certain	A good chance	Completely certain	Completely certain	No	No	No	No	Yes	No	No
hpt076	46	M	Married	Yes	Secondary/Vocational	Private work	5	None	Private	Anti Hypertensive Medication	5	Disagree	Agree	Disagree	Strongly Disagree	Strongly Disagree	Disagree	Agree	Strongly agree	Agree	Strongly agree	Agree	Strongly agree	Agree	Strongly agree	Agree	Uncertain	Agree	Disagree	Disagree	Disagree	Strongly Disagree	Frequently	Sometimes	Sometimes	Sometimes	Completely certain	A good chance	Completely certain	A good chance	Completely certain	A good chance	No	No	Yes	No	Yes	Yes	No
hpt077	47	M	Married	Yes	Tertiary	Government work	6	Diabetes	Private	Anti Dibetic and Hypertensive medication	6	Disagree	Agree	Disagree	Strongly Disagree	Strongly Disagree	Disagree	Agree	Strongly agree	Agree	Strongly agree	Agree	Strongly agree	Agree	Strongly agree	Agree	Uncertain	Agree	Disagree	Disagree	Disagree	Strongly Disagree	Frequently	Sometimes	Sometimes	Sometimes	Completely certain	A good chance	Completely certain	A good chance	Completely certain	A good chance	No	No	Yes	No	Yes	Yes	No
hpt078	45	M	Married	Yes	Tertiary	Government work	5	None	Private	Anti Hypertensive Medication	5	Disagree	Agree	Disagree	Strongly Disagree	Strongly Disagree	Disagree	Agree	Strongly agree	Agree	Strongly agree	Agree	Strongly agree	Agree	Strongly agree	Agree	Uncertain	Agree	Disagree	Disagree	Disagree	Strongly Disagree	Frequently	Sometimes	Sometimes	Sometimes	Completely certain	A good chance	Completely certain	A good chance	Completely certain	A good chance	No	No	Yes	No	Yes	Yes	No
hpt079	53	M	Married	No	Secondary/Vocational	Private work	8	None	NHIS	Anti Hypertensive Medication	8	Strongly agree	Disagree	Agree	Disagree	Agree	Uncertain	Agree	Strongly agree	Agree	Strongly agree	Agree	Agree	Uncertain	Agree	Uncertain	Agree	Agree	Strongly agree	Strongly agree	Strongly Disagree	Agree	Frequently	Sometimes	Sometimes	Frequently	Completely certain	A slight chance	A good chance	A good chance	A good chance	Completely certain	No	Yes	Yes	No	Yes	No	Yes
hpt080	56	M	Married	Yes	Non-formal	Unemployed	14	Heart Failure	NHIS	Anti Hypertensive Medication	14	Strongly Disagree	Uncertain	Uncertain	Agree	Agree	Agree	Agree	Agree	Strongly agree	Strongly agree	Strongly agree	Agree	Agree	Strongly agree	Strongly agree	Uncertain	Disagree	Agree	Agree	Agree	Agree	Never	Occationally	Sometimes	Frequently	A good chance	Average Chance	A slight chance	Average Chance	Averae Chance	Completely certain	No	No	No	Yes	Yes	No	No
hpt081	43	M	Married	Yes	Secondary/Vocational	Private work	5	None	NHIS	Anti Hypertensive Medication	5	Disagree	Strongly Disagree	Disagree	Agree	Disagree	Disagree	Agree	Agree	Strongly agree	Strongly agree	Agree	Agree	Strongly agree	Agree	Strongly agree	Uncertain	Disagree	Disagree	Disagree	Strongly Disagree	Disagree	Sometimes	Occationally	Frequently	Frequently	A good chance	Completely certain	A good chance	A good chance	Completely certain	Completely certain	No	No	No	No	Yes	Yes	No
hpt082	48	M	Married	Yes	Secondary/Vocational	Private work	5	None	NHIS	Anti Hypertensive Medication	5	Disagree	Strongly Disagree	Disagree	Agree	Disagree	Disagree	Agree	Agree	Strongly agree	Strongly agree	Agree	Agree	Strongly agree	Agree	Strongly agree	Uncertain	Disagree	Disagree	Disagree	Strongly Disagree	Disagree	Sometimes	Occationally	Frequently	Frequently	Average Chance	Completely certain	A good chance	A good chance	Completely certain	Completely certain	No	No	No	No	Yes	Yes	No
hpt083	70	M	Married	Yes	Basic	Private work	12	Heart Failure	NHIS	Anti Hypertensive Medication	12	Agree	Strongly agree	Agree	Uncertain	Agree	Agree	Strongly agree	Strongly agree	Agree	Strongly agree	Agree	Strongly agree	Agree	Strongly agree	Agree	Uncertain	Strongly agree	Disagree	Disagree	Disagree	Strongly Disagree	Sometimes	Frequently	Occationally	Rarely	Average Chance	A good chance	Completely certain	A good chance	Completely certain	Completely certain	No	No	No	No	Yes	Yes	No
hpt084	56	M	Married	Yes	Tertiary	Private work	5	None	NHIS	Anti Hypertensive Medication	5	Disagree	Agree	Disagree	Strongly Disagree	Strongly Disagree	Disagree	Agree	Strongly agree	Agree	Strongly agree	Agree	Strongly agree	Agree	Strongly agree	Agree	Uncertain	Agree	Disagree	Disagree	Disagree	Strongly Disagree	Frequently	Sometimes	Sometimes	Sometimes	Completely certain	A good chance	Completely certain	A good chance	Completely certain	A good chance	No	No	Yes	No	Yes	Yes	No
hpt085	64	M	Married	Yes	Tertiary	Government work	14	Diabetes	NHIS	Anti Hypertensive Medication	14	Disagree	Agree	Disagree	Strongly Disagree	Strongly Disagree	Disagree	Agree	Strongly agree	Agree	Strongly agree	Agree	Strongly agree	Agree	Strongly agree	Agree	Uncertain	Agree	Disagree	Disagree	Disagree	Strongly Disagree	Frequently	Sometimes	Sometimes	Sometimes	Completely certain	A good chance	Completely certain	A good chance	Completely certain	A good chance	No	No	Yes	No	Yes	Yes	No
hpt086	70	M	Married	Yes	Basic	Farmer	10	Diabetes	NHIS	Anti Dibetic and Hypertensive medication	10	Agree	Strongly agree	Agree	Uncertain	Agree	Agree	Strongly agree	Strongly agree	Agree	Strongly agree	Agree	Strongly agree	Agree	Strongly agree	Agree	Uncertain	Strongly agree	Disagree	Disagree	Disagree	Strongly Disagree	Sometimes	Frequently	Sometimes	Rarely	Average Chance	A good chance	Completely certain	A good chance	Completely certain	Completely certain	No	No	No	No	Yes	Yes	No
hpt087	60	M	Married	Yes	Tertiary	Farmer	11	Diabetes	NHIS	Anti Hypertensive Medication	11	Agree	Strongly agree	Agree	Uncertain	Agree	Agree	Strongly agree	Strongly agree	Agree	Strongly agree	Agree	Strongly agree	Agree	Strongly agree	Agree	Uncertain	Strongly agree	Disagree	Disagree	Disagree	Strongly Disagree	Sometimes	Frequently	Occationally	Rarely	Average Chance	A good chance	Completely certain	A good chance	Completely certain	Completely certain	No	No	No	No	Yes	Yes	No
hpt088	38	M	Married	Yes	Tertiary	Student	2	None	NHIS	Anti Hypertensive Medication	2	Disagree	Strongly Disagree	Disagree	Agree	Disagree	Disagree	Agree	Agree	Strongly agree	Strongly agree	Agree	Agree	Strongly agree	Agree	Strongly agree	Uncertain	Disagree	Disagree	Disagree	Strongly Disagree	Disagree	Sometimes	Occationally	Frequently	Frequently	Average Chance	Completely certain	A good chance	A good chance	Completely certain	Completely certain	No	No	No	No	Yes	Yes	No
hpt089	48	M	Married	Yes	Basic	Private work	7	None	NHIS	Anti Hypertensive Medication	7	Disagree	Agree	Disagree	Strongly Disagree	Strongly Disagree	Disagree	Agree	Strongly agree	Agree	Strongly agree	Agree	Strongly agree	Agree	Strongly agree	Agree	Uncertain	Agree	Disagree	Disagree	Disagree	Strongly Disagree	Frequently	Sometimes	Sometimes	Sometimes	Completely certain	A good chance	Completely certain	A good chance	Completely certain	A good chance	No	No	Yes	No	Yes	Yes	No
hpt090	63	F	Seperated/Widowed	No	Non-formal	Farmer	11	Diabetes	NHIS	Anti Dibetic and Hypertensive medication	11	Strongly agree	Agree	Strongly agree	Strongly agree	Agree	Disagree	Agree	Strongly Disagree	Strongly agree	Strongly agree	Agree	Strongly agree	Disagree	Strongly agree	Uncertain	Strongly agree	Agree	Strongly agree	Agree	Strongly Disagree	Agree	Never	Occationally	Never	Rarely	No chance at all	A slight chance	Average Chance	No chance at all	A slight chance	Completely certain	No	No	Yes	Yes	No	Yes	No
hpt091	49	M	Married	No	Basic	Farmer	5	None	NHIS	Anti Hypertensive Medication	5	Disagree	Agree	Disagree	Agree	Agree	Disagree	Agree	Disagree	Disagree	Disagree	Disagree	Disagree	Disagree	Disagree	Disagree	Disagree	Disagree	Agree	Agree	Agree	Agree	Rarely	Never	Never	Never	No chance at all	A slight chance	A slight chance	A slight chance	No chance at all	A slight chance	Yes	Yes	Yes	Yes	Yes	Yes	Yes
hpt092	50	M	Married	Yes	Basic	Private work	5	None	NHIS	Anti Hypertensive Medication	5	Disagree	Agree	Disagree	Agree	Agree	Disagree	Agree	Disagree	Disagree	Disagree	Disagree	Disagree	Disagree	Disagree	Disagree	Disagree	Disagree	Agree	Agree	Agree	Agree	Rarely	Never	Never	Never	No chance at all	A slight chance	A slight chance	A slight chance	No chance at all	A slight chance	Yes	Yes	Yes	Yes	Yes	Yes	Yes
hpt093	49	M	Married	Yes	Tertiary	Government work	5	None	NHIS	Anti Hypertensive Medication	5	Disagree	Agree	Disagree	Agree	Agree	Disagree	Agree	Disagree	Disagree	Disagree	Disagree	Disagree	Disagree	Disagree	Disagree	Disagree	Disagree	Agree	Agree	Agree	Agree	Rarely	Never	Never	Never	No chance at all	A slight chance	A slight chance	A slight chance	No chance at all	A slight chance	Yes	Yes	Yes	Yes	Yes	Yes	Yes
hpt094	60	M	Married	No	Basic	Farmer	5	None	NHIS	Anti Hypertensive Medication	5	Disagree	Agree	Disagree	Agree	Agree	Disagree	Agree	Disagree	Disagree	Disagree	Disagree	Disagree	Disagree	Disagree	Disagree	Disagree	Disagree	Agree	Agree	Agree	Agree	Rarely	Never	Never	Never	No chance at all	A slight chance	A slight chance	A slight chance	No chance at all	A slight chance	Yes	Yes	Yes	Yes	Yes	Yes	Yes
hpt095	40	M	Married	Yes	Secondary/Vocational	Private work	3	None	NHIS	Anti Hypertensive Medication	3	Disagree	Agree	Disagree	Strongly Disagree	Strongly Disagree	Disagree	Agree	Strongly agree	Agree	Strongly agree	Agree	Strongly agree	Agree	Strongly agree	Agree	Uncertain	Agree	Disagree	Disagree	Disagree	Strongly Disagree	Frequently	Sometimes	Sometimes	Sometimes	Completely certain	A good chance	Completely certain	A good chance	Completely certain	A good chance	No	No	Yes	No	Yes	Yes	No
hpt096	56	M	Seperated/Widowed	Yes	Non-formal	Farmer	32	Diabetes	NHIS	Anti Dibetic and Hypertensive medication	32	Strongly agree	Disagree	Uncertain	Agree	Strongly agree	Agree	Disagree	Strongly agree	Strongly agree	Agree	Strongly agree	Agree	Agree	Uncertain	Disagree	Agree	Uncertain	Disagree	Uncertain	Disagree	Agree	Never	Occationally	Sometimes	Occationally	Average Chance	A good chance	A good chance	Average Chance	A good chance	Average Chance	Yes	No	No	Yes	Yes	No	Yes
hpt097	63	M	Married	Yes	Basic	Farmer	13	Diabetes	NHIS	Anti Dibetic and Hypertensive medication	13	Strongly agree	Disagree	Disagree	Agree	Agree	Disagree	Strongly agree	Strongly agree	Strongly agree	Agree	Strongly agree	Agree	Agree	Uncertain	Disagree	Agree	Uncertain	Uncertain	Uncertain	Uncertain	Uncertain	Rarely	Occationally	Rarely	Sometimes	A good chance	Completely certain	A good chance	Average Chance	A good chance	Completely certain	No	No	No	Yes	Yes	No	Yes
hpt098	45	M	Married	Yes	Secondary/Vocational	Government work	5	None	NHIS	Anti Hypertensive Medication	5	Disagree	Agree	Disagree	Agree	Agree	Disagree	Agree	Disagree	Disagree	Disagree	Disagree	Disagree	Disagree	Disagree	Disagree	Disagree	Disagree	Agree	Agree	Agree	Agree	Rarely	Never	Never	Never	No chance at all	A slight chance	A slight chance	A slight chance	No chance at all	A slight chance	Yes	Yes	Yes	Yes	Yes	Yes	Yes
hpt099	47	M	Married	Yes	Basic	Farmer	5	None	NHIS	Anti Hypertensive Medication	5	Disagree	Agree	Disagree	Agree	Agree	Disagree	Agree	Disagree	Disagree	Disagree	Disagree	Disagree	Disagree	Disagree	Disagree	Disagree	Disagree	Agree	Agree	Agree	Agree	Rarely	Never	Never	Never	No chance at all	A slight chance	A slight chance	A slight chance	No chance at all	A slight chance	Yes	Yes	Yes	Yes	Yes	Yes	Yes
hpt100	46	M	Married	Yes	Secondary/Vocational	Government work	5	None	NHIS	Anti Hypertensive Medication	5	Disagree	Agree	Disagree	Agree	Agree	Disagree	Agree	Disagree	Disagree	Disagree	Disagree	Disagree	Disagree	Disagree	Disagree	Disagree	Disagree	Agree	Agree	Agree	Agree	Rarely	Never	Never	Never	No chance at all	A slight chance	A slight chance	A slight chance	No chance at all	A slight chance	Yes	Yes	Yes	Yes	Yes	Yes	Yes
hpt101	56	M	Married	No	Tertiary	Government work	5	None	NHIS	Anti Hypertensive Medication	5	Disagree	Agree	Disagree	Agree	Agree	Disagree	Agree	Disagree	Disagree	Disagree	Disagree	Disagree	Disagree	Disagree	Disagree	Disagree	Disagree	Agree	Agree	Agree	Agree	Rarely	Never	Never	Never	No chance at all	A slight chance	A slight chance	A slight chance	No chance at all	A slight chance	Yes	Yes	Yes	Yes	Yes	Yes	Yes
hpt102	40	F	Married	Yes	Tertiary	Government work	4	None	Private	Anti Hypertensive Medication	4	Disagree	Uncertain	Agree	Agree	Agree	Strongly agree	Strongly Disagree	Agree	Strongly agree	Strongly agree	Agree	Strongly agree	Agree	Strongly agree	Agree	Uncertain	Strongly Disagree	Disagree	Disagree	Disagree	Disagree	Sometimes	Occationally	Sometimes	Rarely	Average Chance	A good chance	Completely certain	A good chance	Completely certain	Completely certain	No	No	No	No	Yes	Yes	No
hpt103	58	F	Married	Yes	Non-formal	Farmer	2	Diabetes	NHIS	Anti Hypertensive Medication	2	Strongly agree	Agree	Agree	Strongly agree	Agree	Agree	Strongly agree	Agree	Strongly agree	Strongly agree	Agree	Strongly agree	Agree	Agree	Agree	Agree	Disagree	Strongly Disagree	Disagree	Strongly Disagree	Strongly Disagree	Never	Occationally	Occationally	Never	A good chance	A good chance	Completely certain	Completely certain	Completely certain	Completely certain	No	No	No	No	Yes	No	No
hpt104	52	M	Married	Yes	Secondary/Vocational	Private work	7	None	None	Anti Dibetic and Hypertensive medication	7	Disagree	Agree	Strongly agree	Strongly agree	Agree	Strongly agree	Strongly agree	Strongly agree	Strongly agree	Strongly agree	Agree	Strongly agree	Strongly agree	Agree	Agree	Agree	Agree	Strongly agree	Agree	Agree	Agree	Occationally	Sometimes	Occationally	Frequently	Average Chance	A good chance	Completely certain	Completely certain	Completely certain	Completely certain	Yes	No	No	Yes	No	Yes	No
hpt105	59	M	Married	Yes	Secondary/Vocational	Farmer	8	None	None	Anti Hypertensive Medication	8	Agree	Agree	Strongly agree	Strongly agree	Agree	Strongly agree	Agree	Strongly agree	Agree	Strongly agree	Agree	Strongly agree	Strongly agree	Agree	Agree	Agree	Agree	Strongly agree	Agree	Strongly agree	Agree	Occationally	Sometimes	Occationally	Frequently	Average Chance	A good chance	Completely certain	A good chance	Completely certain	Completely certain	Yes	No	No	No	Yes	Yes	No
hpt106	59	M	Married	Yes	Secondary/Vocational	Government work	4	None	NHIS	Anti Hypertensive Medication	4	Agree	Strongly agree	Agree	Uncertain	Agree	Agree	Strongly agree	Strongly agree	Agree	Strongly agree	Agree	Strongly agree	Agree	Strongly agree	Agree	Uncertain	Agree	Disagree	Disagree	Disagree	Strongly Disagree	Sometimes	Frequently	Occationally	Rarely	Average Chance	A good chance	Completely certain	A good chance	Completely certain	Completely certain	No	No	No	No	Yes	Yes	No
hpt107	35	M	Married	Yes	Secondary/Vocational	Private work	6	Diabetes	NHIS	Anti Dibetic and Hypertensive medication	6	Disagree	Strongly Disagree	Disagree	Agree	Disagree	Disagree	Agree	Agree	Strongly agree	Strongly agree	Agree	Strongly agree	Agree	Strongly agree	Agree	Uncertain	Disagree	Disagree	Disagree	Strongly Disagree	Disagree	Sometimes	Occationally	Frequently	Frequently	Average Chance	Completely certain	A good chance	A good chance	Completely certain	Completely certain	No	No	No	No	Yes	Yes	No
hpt108	52	M	Married	Yes	Tertiary	Government work	6	None	Private	Anti Hypertensive Medication	6	Disagree	Agree	Disagree	Strongly Disagree	Strongly Disagree	Disagree	Agree	Strongly agree	Agree	Strongly agree	Agree	Strongly agree	Agree	Strongly agree	Agree	Uncertain	Agree	Disagree	Disagree	Disagree	Strongly Disagree	Frequently	Sometimes	Sometimes	Sometimes	Completely certain	A good chance	Completely certain	A good chance	Completely certain	A good chance	No	No	Yes	No	Yes	Yes	No
hpt109	60	M	Married	Yes	Secondary/Vocational	Private work	9	None	NHIS	Anti Hypertensive Medication	9	Agree	Strongly agree	Agree	Uncertain	Agree	Agree	Strongly agree	Strongly agree	Agree	Strongly agree	Agree	Strongly agree	Agree	Strongly agree	Agree	Uncertain	Strongly agree	Disagree	Disagree	Disagree	Strongly Disagree	Sometimes	Frequently	Occationally	Rarely	Average Chance	A good chance	Completely certain	A good chance	Completely certain	Completely certain	No	No	No	No	Yes	Yes	No
hpt110	74	F	Married	No	Non-formal	Farmer	10	Diabetes	NHIS	Anti Dibetic and Hypertensive medication	10	Agree	Strongly agree	Agree	Uncertain	Agree	Agree	Strongly agree	Strongly agree	Agree	Strongly agree	Agree	Strongly agree	Agree	Strongly agree	Agree	Uncertain	Strongly agree	Disagree	Disagree	Disagree	Strongly Disagree	Sometimes	Frequently	Sometimes	Rarely	Average Chance	A good chance	Completely certain	A good chance	Completely certain	Completely certain	No	No	No	No	Yes	Yes	No
hpt111	56	F	Married	Yes	Non-formal	Farmer	20	Diabetes	NHIS	Anti Dibetic and Hypertensive medication	20	Agree	Strongly agree	Strongly agree	Agree	Agree	Strongly agree	Agree	Strongly agree	Strongly agree	Strongly agree	Agree	Strongly agree	Agree	Strongly agree	Uncertain	Strongly agree	Agree	Uncertain	Uncertain	Disagree	Strongly Disagree	Sometimes	Frequently	Occationally	Rarely	A slight chance	A good chance	Completely certain	A good chance	Completely certain	Completely certain	No	No	No	No	Yes	Yes	No
hpt112	54	M	Married	Yes	Tertiary	Government work	7	None	Private	Anti Dibetic and Hypertensive medication	7	Agree	Agree	Strongly agree	Strongly agree	Agree	Strongly agree	Strongly agree	Strongly agree	Agree	Strongly agree	Strongly agree	Strongly agree	Strongly agree	Strongly agree	Agree	Uncertain	Agree	Agree	Agree	Uncertain	Agree	Frequently	Sometimes	Frequently	Frequently	A good chance	Average Chance	A good chance	Completely certain	Completely certain	Completely certain	No	No	No	No	Yes	No	Yes
hpt113	40	M	Married	No	Tertiary	Government work	5	None	NHIS	Anti Hypertensive Medication	5	Agree	Agree	Strongly agree	Strongly agree	Agree	Strongly agree	Strongly agree	Strongly agree	Agree	Strongly agree	Agree	Strongly agree	Strongly agree	Agree	Agree	Strongly agree	Agree	Strongly agree	Agree	Strongly agree	Agree	Occationally	Sometimes	Occationally	Frequently	Average Chance	A good chance	Completely certain	A good chance	Completely certain	Completely certain	Yes	No	No	No	Yes	Yes	No
hpt114	58	M	Married	Yes	Tertiary	Government work	12	Diabetes	Private	Anti Dibetic and Hypertensive medication	12	Agree	Agree	Strongly agree	Strongly agree	Agree	Strongly agree	Agree	Strongly agree	Agree	Strongly agree	Agree	Strongly agree	Strongly agree	Agree	Agree	Agree	Agree	Strongly agree	Agree	Strongly agree	Agree	Occationally	Sometimes	Occationally	Frequently	Average Chance	A good chance	Completely certain	A good chance	Completely certain	Completely certain	Yes	No	No	No	Yes	Yes	No
hpt115	47	M	Married	Yes	Tertiary	Government work	6	Diabetes	Private	Anti Dibetic and Hypertensive medication	6	Agree	Agree	Strongly agree	Strongly agree	Agree	Strongly agree	Agree	Strongly agree	Agree	Strongly agree	Agree	Strongly agree	Strongly agree	Agree	Agree	Agree	Agree	Strongly agree	Agree	Strongly agree	Agree	Occationally	Sometimes	Occationally	Frequently	Average Chance	A good chance	Completely certain	A good chance	Completely certain	Completely certain	Yes	No	No	No	Yes	Yes	No
hpt116	33	M	Single	No	Secondary/Vocational	Farmer	4	Heart Failure	NHIS	Anti Dibetic and Hypertensive medication	4	Uncertain	Disagree	Agree	Disagree	Agree	Agree	Agree	Strongly agree	Strongly agree	Agree	Agree	Strongly agree	Strongly agree	Uncertain	Agree	Disagree	Agree	Agree	Agree	Strongly agree	Uncertain	Occationally	Frequently	Sometimes	Never	A good chance	A good chance	Average Chance	Average Chance	A good chance	Completely certain	Yes	No	Yes	Yes	Yes	No	Yes
hpt117	43	M	Married	Yes	Tertiary	Private work	2	None	NHIS	Anti Dibetic and Hypertensive medication	2	Agree	Uncertain	Agree	Disagree	Strongly agree	Strongly agree	Agree	Strongly agree	Strongly agree	Strongly agree	Agree	Agree	Agree	Agree	Agree	Agree	Disagree	Agree	Agree	Agree	Disagree	Sometimes	Occationally	Sometimes	Never	A good chance	Average Chance	Average Chance	Average Chance	A good chance	A good chance	Yes	Yes	Yes	Yes	Yes	No	Yes
hpt118	40	M	Single	Yes	Tertiary	Government work	8	None	NHIS	Anti Hypertensive Medication	8	Strongly agree	Strongly agree	Disagree	Strongly agree	Strongly agree	Strongly agree	Agree	Strongly agree	Strongly agree	Strongly agree	Strongly agree	Strongly agree	Strongly agree	Strongly agree	Agree	Uncertain	Agree	Agree	Agree	Uncertain	Agree	Frequently	Sometimes	Frequently	Frequently	Completely certain	Completely certain	Completely certain	Completely certain	Completely certain	Completely certain	No	No	No	No	Yes	No	Yes
hpt119	69	M	Married	Yes	Tertiary	Government work	9	Heart Failure	NHIS	Anti Dibetic and Hypertensive medication	9	Strongly agree	Agree	Uncertain	Disagree	Agree	Agree	Agree	Strongly agree	Strongly agree	Agree	Strongly agree	Strongly agree	Strongly agree	Agree	Disagree	Agree	Agree	Strongly agree	Strongly agree	Disagree	Strongly agree	55	Occationally	Frequently	Frequently	Average Chance	A good chance	Completely certain	Completely certain	Completely certain	Completely certain	No	No	No	No	Yes	No	No
hpt120	40	M	Single	Yes	Tertiary	Government work	4	Heart Failure	NHIS	Anti Dibetic and Hypertensive medication	4	Strongly agree	Strongly agree	Disagree	Strongly agree	Strongly agree	Strongly agree	Strongly agree	Agree	Strongly agree	Strongly agree	Strongly agree	Strongly agree	Strongly agree	Strongly agree	Agree	Uncertain	Agree	Agree	Agree	Uncertain	Agree	Frequently	Sometimes	Frequently	Frequently	Completely certain	Completely certain	Completely certain	Completely certain	Completely certain	Completely certain	No	No	No	No	Yes	No	Yes
hpt121	36	M	Single	Yes	Secondary/Vocational	Private work	2	None	None	Anti Hypertensive Medication	2	Uncertain	Strongly agree	Strongly agree	Agree	Strongly agree	Strongly agree	Strongly agree	Strongly agree	Strongly agree	Strongly agree	Agree	Strongly agree	Strongly agree	Agree	Agree	Agree	Agree	Strongly agree	Agree	Agree	Uncertain	Occationally	Sometimes	Occationally	Frequently	A slight chance	Average Chance	Completely certain	Completely certain	Completely certain	Completely certain	Yes	No	No	No	Yes	Yes	No
hpt122	36	M	Single	No	Tertiary	Government work	7	Heart Failure	Private	Anti Hypertensive Medication	7	Strongly agree	Strongly agree	Disagree	Strongly agree	Strongly agree	Strongly agree	Agree	Strongly agree	Strongly agree	Strongly agree	Strongly agree	Strongly agree	Strongly agree	Strongly agree	Agree	Uncertain	Agree	Agree	Agree	Uncertain	Agree	Frequently	Sometimes	Frequently	Frequently	Completely certain	Completely certain	Completely certain	Completely certain	Completely certain	Completely certain	No	No	No	No	Yes	No	Yes
hpt123	60	M	Married	Yes	Tertiary	Government work	5	None	NHIS	Anti Hypertensive Medication	5	Strongly agree	Agree	Uncertain	Disagree	Agree	Agree	Agree	Strongly agree	Strongly agree	Agree	Strongly agree	Strongly agree	Strongly agree	Agree	Disagree	Agree	Agree	Strongly agree	Strongly agree	Disagree	Strongly agree	Frequently	Occationally	Frequently	Frequently	Average Chance	A good chance	Completely certain	Completely certain	Completely certain	Completely certain	No	No	No	No	Yes	No	No
hpt124	50	M	Married	Yes	Secondary/Vocational	Private work	2	None	NHIS	Anti Dibetic and Hypertensive medication	2	Agree	Uncertain	Uncertain	Disagree	Agree	Agree	Agree	Strongly agree	Strongly agree	Agree	Agree	Strongly agree	Strongly agree	Agree	Disagree	Uncertain	Agree	Strongly agree	Agree	Agree	Strongly agree	Occationally	Sometimes	Frequently	Never	A slight chance	Average Chance	A good chance	Completely certain	Completely certain	A good chance	Yes	No	#NULL!	#NULL!	#NULL!	#NULL!	#NULL!
hpt125	50	M	Married	Yes	Tertiary	Government work	5	None	Private	Anti Hypertensive Medication	5	Strongly agree	Agree	Strongly agree	Agree	Strongly agree	Agree	Strongly agree	Agree	Uncertain	Strongly agree	Strongly agree	Agree	Strongly agree	Strongly agree	Agree	Agree	Agree	Agree	Agree	Uncertain	Agree	Frequently	Sometimes	Frequently	Frequently	A good chance	Completely certain	Completely certain	A good chance	Completely certain	Completely certain	Yes	No	No	No	Yes	No	Yes
hpt126	50	M	Married	Yes	Secondary/Vocational	Private work	6	Diabetes	NHIS	Anti Dibetic and Hypertensive medication	6	Agree	Agree	Strongly agree	Strongly agree	Agree	Strongly agree	Agree	Strongly agree	Agree	Strongly agree	Agree	Strongly agree	Strongly agree	Agree	Agree	Agree	Agree	Strongly agree	Agree	Strongly agree	Agree	Occationally	Sometimes	Occationally	Sometimes	Average Chance	A good chance	Completely certain	A good chance	Completely certain	Completely certain	Yes	No	No	No	Yes	Yes	No
hpt127	42	M	Married	Yes	Secondary/Vocational	Private work	6	None	NHIS	Anti Hypertensive Medication	6	Disagree	Agree	Disagree	Strongly Disagree	Strongly Disagree	Disagree	Agree	Strongly agree	Agree	Strongly agree	Agree	Strongly agree	Agree	Strongly agree	Agree	Uncertain	Agree	Disagree	Disagree	Disagree	Strongly Disagree	Frequently	Sometimes	Sometimes	Sometimes	Completely certain	A good chance	Completely certain	A good chance	Completely certain	A good chance	No	No	Yes	No	Yes	Yes	No
hpt128	64	M	Married	Yes	Basic	Farmer	15	Diabetes	NHIS	Anti Dibetic and Hypertensive medication	15	Disagree	Agree	Disagree	Strongly Disagree	Strongly Disagree	Disagree	Agree	Strongly agree	Agree	Strongly agree	Agree	Strongly agree	Agree	Strongly agree	Agree	Uncertain	Agree	Disagree	Disagree	Disagree	Strongly Disagree	Frequently	Sometimes	Sometimes	Sometimes	Completely certain	A good chance	Completely certain	A good chance	Completely certain	A good chance	No	No	Yes	No	Yes	Yes	No
hpt129	74	M	Married	Yes	Secondary/Vocational	Private work	12	Diabetes	NHIS	Anti Hypertensive Medication	12	Agree	Strongly agree	Agree	Strongly agree	Agree	Agree	Strongly agree	Strongly agree	Agree	Strongly agree	Agree	Strongly agree	Agree	Strongly agree	Agree	Uncertain	Strongly agree	Disagree	Disagree	Disagree	Strongly Disagree	Sometimes	Frequently	Occationally	Rarely	Average Chance	A good chance	Completely certain	A good chance	Completely certain	Completely certain	No	No	No	No	Yes	Yes	No
hpt130	54	M	Married	Yes	Secondary/Vocational	Farmer	10	None	NHIS	Anti Hypertensive Medication	10	Disagree	Agree	Disagree	Strongly Disagree	Strongly Disagree	Disagree	Agree	Strongly agree	Agree	Strongly agree	Agree	Strongly agree	Agree	Strongly agree	Agree	Uncertain	Agree	Disagree	Disagree	Disagree	Strongly Disagree	Frequently	Sometimes	Sometimes	Sometimes	Completely certain	A good chance	Completely certain	A good chance	Completely certain	A good chance	No	No	Yes	No	Yes	Yes	No
hpt131	27	M	Single	Yes	Tertiary	Government work	4	None	Private	Anti Hypertensive Medication	4	Disagree	Agree	Strongly Disagree	Agree	Agree	Strongly agree	Agree	Strongly agree	Agree	Agree	Strongly agree	Agree	Strongly agree	Agree	Strongly agree	Uncertain	Strongly agree	Strongly Disagree	Disagree	Disagree	Strongly Disagree	Frequently	Frequently	Sometimes	Occationally	Completely certain	A good chance	A good chance	Completely certain	Completely certain	Completely certain	No	No	No	No	Yes	Yes	No
hpt132	70	M	Married	Yes	Basic	Government work	16	Diabetes	NHIS	Anti Dibetic and Hypertensive medication	16	Agree	Strongly agree	Agree	Uncertain	Agree	Agree	Strongly agree	Strongly agree	Agree	Strongly agree	Agree	Strongly agree	Agree	Strongly agree	Agree	Uncertain	Strongly agree	Disagree	Disagree	Disagree	Strongly Disagree	Sometimes	Frequently	Occationally	Rarely	Average Chance	A good chance	Completely certain	A good chance	Completely certain	Completely certain	No	No	No	No	Yes	Yes	No
hpt133	52	M	Married	Yes	Basic	Private work	4	None	NHIS	Anti Hypertensive Medication	4	Uncertain	Strongly Disagree	Agree	Agree	Strongly agree	Agree	Agree	Strongly agree	Strongly agree	Strongly agree	Strongly agree	Strongly agree	Strongly agree	Agree	Agree	Agree	Uncertain	Disagree	Strongly Disagree	Disagree	Strongly Disagree	Sometimes	Sometimes	Never	Never	A good chance	Completely certain	Completely certain	A good chance	Completely certain	Completely certain	Yes	Yes	No	No	Yes	No	Yes
hpt134	56	M	Seperated/Widowed	Yes	Non-formal	Farmer	22	Diabetes	NHIS	Anti Dibetic and Hypertensive medication	22	Agree	Uncertain	Disagree	Agree	Agree	Agree	Agree	Strongly agree	Strongly agree	Strongly agree	Agree	Strongly agree	Agree	Uncertain	Disagree	Uncertain	Agree	Agree	Disagree	Agree	Disagree	Sometimes	Occationally	Frequently	Rarely	Average Chance	A good chance	Completely certain	Average Chance	A good chance	A good chance	No	No	No	No	Yes	No	No
hpt135	47	M	Married	Yes	Secondary/Vocational	Private work	9	None	NHIS	Anti Hypertensive Medication	9	Disagree	Strongly Disagree	Disagree	Agree	Disagree	Disagree	Agree	Agree	Strongly agree	Strongly agree	Agree	Agree	Strongly agree	Agree	Strongly agree	Uncertain	Disagree	Disagree	Disagree	Strongly Disagree	Disagree	Sometimes	Occationally	Frequently	Frequently	Average Chance	Completely certain	A good chance	A good chance	Completely certain	Completely certain	No	No	No	No	Yes	Yes	No
hpt136	71	M	Married	Yes	Basic	Private work	10	None	NHIS	Anti Hypertensive Medication	10	Strongly Disagree	Strongly Disagree	Disagree	Uncertain	Uncertain	Uncertain	Strongly agree	Disagree	Disagree	Strongly agree	Strongly agree	Strongly agree	Strongly agree	Strongly agree	Strongly agree	Strongly agree	Strongly agree	Disagree	Strongly Disagree	Disagree	Strongly Disagree	Occationally	Occationally	Occationally	Never	A good chance	Completely certain	Average Chance	A good chance	Completely certain	Completely certain	Yes	Yes	No	No	Yes	No	No
hpt137	42	M	Married	Yes	Tertiary	Government work	4	Diabetes	NHIS	Anti Hypertensive Medication	4	Strongly agree	Agree	Agree	Agree	Strongly agree	Agree	Agree	Strongly agree	Agree	Strongly agree	Agree	Strongly agree	Agree	Agree	Agree	Agree	Strongly Disagree	Disagree	Disagree	Uncertain	Uncertain	Rarely	Frequently	Frequently	Never	A good chance	Completely certain	A good chance	Completely certain	A good chance	Completely certain	No	No	No	No	Yes	Yes	No
hpt138	60	M	Married	Yes	Secondary/Vocational	Government work	7	Heart Failure	NHIS	Anti Hypertensive Medication	7	Disagree	Strongly Disagree	Disagree	Agree	Strongly agree	Agree	Agree	Strongly agree	Strongly agree	Agree	Strongly agree	Agree	Strongly agree	Agree	Agree	Agree	Disagree	Disagree	Strongly Disagree	Disagree	Uncertain	Sometimes	Frequently	Sometimes	Frequently	A good chance	Completely certain	A good chance	Completely certain	A good chance	Completely certain	No	No	No	Yes	Yes	Yes	No
hpt139	40	M	Married	Yes	Tertiary	Government work	3	None	NHIS	Anti Hypertensive Medication	3	Disagree	Disagree	Strongly Disagree	Agree	Agree	Agree	Agree	Agree	Agree	Strongly agree	Agree	Strongly agree	Agree	Strongly agree	Agree	Uncertain	Disagree	Disagree	Strongly Disagree	Disagree	Uncertain	Sometimes	Sometimes	Occationally	Frequently	A good chance	Completely certain	A good chance	Completely certain	A good chance	Completely certain	No	No	No	Yes	Yes	Yes	No
hpt140	57	M	Married	Yes	Secondary/Vocational	Government work	4	None	NHIS	Anti Hypertensive Medication	4	Agree	Agree	Agree	Strongly agree	Agree	Agree	Strongly agree	Strongly agree	Agree	Agree	Strongly agree	Agree	Strongly agree	Strongly agree	Agree	Agree	Agree	Disagree	Disagree	Strongly Disagree	Disagree	Never	Never	Occationally	Never	Completely certain	A good chance	Completely certain	Completely certain	Completely certain	Completely certain	Yes	No	No	No	Yes	No	No
hpt141	57	M	Married	Yes	Basic	Farmer	7	None	NHIS	Anti Hypertensive Medication	7	Strongly agree	Agree	Agree	Agree	Strongly agree	Agree	Agree	Strongly agree	Agree	Strongly agree	Agree	Strongly agree	Agree	Agree	Agree	Agree	Strongly Disagree	Disagree	Disagree	Uncertain	Uncertain	Rarely	Frequently	Frequently	Never	A good chance	Completely certain	A good chance	Completely certain	A good chance	Completely certain	No	No	No	No	Yes	Yes	No
hpt142	68	M	Married	Yes	Tertiary	Government work	12	Diabetes	NHIS	Anti Dibetic and Hypertensive medication	12	Agree	Strongly agree	Agree	Uncertain	Agree	Agree	Strongly agree	Strongly agree	Agree	Strongly agree	Agree	Strongly agree	Agree	Strongly agree	Agree	Uncertain	Strongly agree	Disagree	Disagree	Disagree	Strongly Disagree	Sometimes	Frequently	Occationally	Rarely	Average Chance	A good chance	Completely certain	A good chance	Completely certain	Completely certain	No	No	No	No	Yes	Yes	No
hpt143	62	M	Married	Yes	Secondary/Vocational	Government work	5	None	NHIS	Anti Hypertensive Medication	5	Disagree	Agree	Disagree	Agree	Agree	Disagree	Agree	Disagree	Disagree	Disagree	Disagree	Disagree	Disagree	Disagree	Disagree	Disagree	Disagree	Agree	Agree	Agree	Agree	Rarely	Never	Never	Never	No chance at all	A slight chance	A slight chance	A slight chance	No chance at all	A slight chance	Yes	Yes	Yes	Yes	Yes	Yes	Yes
hpt144	58	M	Married	Yes	Tertiary	Government work	5	None	NHIS	Anti Hypertensive Medication	5	Disagree	Agree	Disagree	Agree	Agree	Disagree	Agree	Disagree	Disagree	Disagree	Disagree	Disagree	Disagree	Disagree	Disagree	Disagree	Disagree	Agree	Agree	Agree	Agree	Rarely	Never	Never	Never	No chance at all	A slight chance	A slight chance	A slight chance	No chance at all	A slight chance	Yes	Yes	Yes	Yes	Yes	Yes	Yes
hpt145	48	M	Married	Yes	Tertiary	Government work	4	None	NHIS	Anti Hypertensive Medication	4	Disagree	Agree	Disagree	Agree	Agree	Disagree	Agree	Disagree	Disagree	Disagree	Disagree	Disagree	Disagree	Disagree	Disagree	Disagree	Disagree	Agree	Agree	Agree	Agree	Rarely	Never	Never	Never	No chance at all	A slight chance	A slight chance	A slight chance	No chance at all	A slight chance	Yes	Yes	Yes	Yes	Yes	Yes	Yes
hpt146	50	M	Cohabitating	Yes	Basic	Private work	5	None	NHIS	Anti Hypertensive Medication	5	Disagree	Agree	Disagree	Agree	Agree	Disagree	Agree	Disagree	Disagree	Disagree	Disagree	Disagree	Disagree	Disagree	Disagree	Disagree	Disagree	Agree	Agree	Agree	Agree	Rarely	Never	Never	Never	No chance at all	A slight chance	A slight chance	A slight chance	No chance at all	A slight chance	Yes	Yes	Yes	Yes	Yes	Yes	Yes
hpt147	51	M	Married	Yes	Basic	Farmer	5	None	NHIS	Anti Hypertensive Medication	5	Disagree	Agree	Disagree	Agree	Agree	Disagree	Agree	Disagree	Disagree	Disagree	Disagree	Disagree	Disagree	Disagree	Disagree	Disagree	Disagree	Agree	Agree	Agree	Agree	Rarely	Never	Never	Never	No chance at all	A slight chance	A slight chance	A slight chance	No chance at all	A slight chance	Yes	Yes	Yes	Yes	Yes	Yes	Yes
hpt148	47	M	Married	Yes	Basic	Farmer	3	None	None	Anti Hypertensive Medication	3	Uncertain	Strongly Disagree	Agree	Agree	Strongly agree	Agree	Agree	Strongly agree	Strongly agree	Strongly agree	Strongly agree	Strongly agree	Strongly agree	Agree	Agree	Agree	Uncertain	Disagree	Strongly Disagree	Disagree	Strongly Disagree	Sometimes	Sometimes	Never	Never	A good chance	Completely certain	Completely certain	A good chance	Completely certain	Completely certain	Yes	Yes	No	No	Yes	No	Yes
hpt149	72	M	Married	Yes	Basic	Farmer	10	None	NHIS	Anti Hypertensive Medication	10	Strongly Disagree	Strongly Disagree	Disagree	Uncertain	Uncertain	Uncertain	Strongly agree	Disagree	Disagree	Strongly agree	Strongly agree	Strongly agree	Strongly agree	Strongly agree	Strongly agree	Strongly agree	Strongly agree	Disagree	Strongly Disagree	Disagree	Strongly Disagree	Occationally	Occationally	Occationally	Never	A good chance	Completely certain	Average Chance	A good chance	Completely certain	Completely certain	Yes	Yes	No	No	Yes	No	No
hpt150	45	M	Married	Yes	Basic	Private work	6	None	NHIS	Anti Hypertensive Medication	6	Disagree	Uncertain	Disagree	Uncertain	Agree	Strongly agree	Agree	Strongly agree	Agree	Strongly agree	Agree	Strongly agree	Strongly agree	Agree	Strongly agree	Uncertain	Strongly Disagree	Disagree	Disagree	Agree	Uncertain	Frequently	Sometimes	Occationally	Never	A good chance	Completely certain	A good chance	Completely certain	A good chance	Completely certain	No	No	Yes	Yes	Yes	No	No
hpt151	52	M	Married	Yes	Basic	Private work	10	None	NHIS	Anti Hypertensive Medication	10	Disagree	Agree	Uncertain	Agree	Agree	Strongly agree	Agree	Strongly agree	Strongly agree	Strongly agree	Agree	Strongly agree	Agree	Uncertain	Uncertain	Agree	Agree	Agree	Agree	Uncertain	Agree	Occationally	Sometimes	Never	Never	Average Chance	A slight chance	A good chance	A good chance	A good chance	Completely certain	Yes	No	No	Yes	Yes	No	Yes
hpt152	77	M	Married	Yes	Secondary/Vocational	Private work	15	Diabetes	NHIS	Anti Dibetic and Hypertensive medication	15	Disagree	Agree	Uncertain	Agree	Agree	Strongly agree	Agree	Strongly agree	Strongly agree	Strongly agree	Agree	Strongly agree	Agree	Uncertain	Uncertain	Agree	Agree	Agree	Agree	Uncertain	Agree	Occationally	Sometimes	Never	Never	Average Chance	A slight chance	A good chance	A good chance	A good chance	Completely certain	Yes	No	No	Yes	Yes	No	Yes
hpt153	49	M	Married	Yes	Basic	Private work	5	None	NHIS	Anti Hypertensive Medication	5	Strongly agree	Agree	Agree	Uncertain	Disagree	Uncertain	Agree	Strongly agree	Agree	Strongly agree	Agree	Agree	Uncertain	Agree	Uncertain	Agree	Strongly agree	Strongly agree	Agree	Disagree	Agree	Occationally	Rarely	Sometimes	Sometimes	Average Chance	A good chance	Average Chance	A slight chance	Completely certain	Completely certain	No	No	No	No	Yes	No	Yes
hpt154	39	M	Seperated/Widowed	Yes	Non-formal	Private work	4	None	NHIS	Anti Hypertensive Medication	4	Strongly agree	Agree	Agree	Disagree	Agree	Uncertain	Agree	Strongly agree	Agree	Agree	Agree	Agree	Uncertain	Agree	Uncertain	Agree	Strongly agree	Strongly agree	Agree	Disagree	Agree	Occationally	Rarely	Sometimes	Rarely	Average Chance	A good chance	Average Chance	A slight chance	Completely certain	Completely certain	No	No	No	No	Yes	No	Yes
hpt155	41	F	Married	Yes	Secondary/Vocational	Government work	2	None	NHIS	Anti Hypertensive Medication	2	Strongly agree	Agree	Uncertain	Disagree	Agree	Uncertain	Agree	Strongly agree	Agree	Strongly agree	Agree	Agree	Uncertain	Agree	Uncertain	Agree	Strongly agree	Strongly agree	Agree	Disagree	Agree	Occationally	Rarely	Sometimes	Sometimes	Average Chance	A good chance	Average Chance	A slight chance	Completely certain	Completely certain	No	No	No	No	Yes	No	Yes
hpt156	56	F	Married	Yes	Non-formal	Unemployed	15	None	NHIS	Anti Hypertensive Medication	15	Strongly agree	Agree	Agree	Uncertain	Agree	Uncertain	Agree	Strongly agree	Agree	Strongly agree	Agree	Agree	Uncertain	Agree	Uncertain	Agree	Strongly agree	Strongly agree	Agree	Disagree	Agree	Occationally	Rarely	Sometimes	Sometimes	Average Chance	A good chance	Average Chance	A slight chance	Completely certain	Completely certain	No	No	No	No	Yes	No	Yes
hpt157	52	M	Married	Yes	Secondary/Vocational	Government work	5	None	NHIS	Anti Hypertensive Medication	5	Disagree	Agree	Disagree	Agree	Agree	Disagree	Agree	Disagree	Disagree	Disagree	Disagree	Disagree	Disagree	Disagree	Disagree	Disagree	Disagree	Agree	Agree	Agree	Agree	Rarely	Never	Never	Never	No chance at all	A slight chance	A slight chance	A slight chance	No chance at all	A slight chance	Yes	Yes	Yes	Yes	Yes	Yes	Yes
hpt158	40	M	Married	Yes	Secondary/Vocational	Government work	5	None	NHIS	Anti Hypertensive Medication	5	Disagree	Agree	Disagree	Agree	Agree	Disagree	Agree	Disagree	Disagree	Disagree	Disagree	Disagree	Disagree	Disagree	Disagree	Disagree	Disagree	Agree	Agree	Agree	Agree	Rarely	Never	Never	Never	No chance at all	A slight chance	A slight chance	A slight chance	No chance at all	A slight chance	Yes	Yes	Yes	Yes	Yes	Yes	Yes
hpt159	51	M	Married	Yes	Tertiary	Farmer	7	Diabetes	NHIS	Anti Dibetic and Hypertensive medication	7	Disagree	Agree	Disagree	Strongly Disagree	Strongly Disagree	Disagree	Agree	Strongly agree	Agree	Strongly agree	Agree	Strongly agree	Agree	Strongly agree	Agree	Uncertain	Strongly agree	Disagree	Disagree	Disagree	Strongly Disagree	Frequently	Sometimes	Sometimes	Sometimes	Completely certain	A good chance	Completely certain	A good chance	Completely certain	Completely certain	No	No	Yes	No	Yes	Yes	No
hpt160	53	M	Married	Yes	Tertiary	Government work	7	Diabetes	NHIS	Anti Hypertensive Medication	7	Disagree	Agree	Disagree	Strongly Disagree	Strongly Disagree	Disagree	Agree	Strongly agree	Agree	Strongly agree	Agree	Strongly agree	Agree	Strongly agree	Agree	Uncertain	Strongly agree	Disagree	Disagree	Disagree	Strongly Disagree	Frequently	Sometimes	Sometimes	Sometimes	Completely certain	A good chance	Completely certain	A good chance	Completely certain	Completely certain	No	No	Yes	No	Yes	Yes	No
hpt161	47	M	Married	Yes	Secondary/Vocational	Private work	7	None	NHIS	Anti Hypertensive Medication	7	Strongly agree	Disagree	Agree	Disagree	Agree	Uncertain	Agree	Strongly agree	Agree	Strongly agree	Agree	Agree	Uncertain	Agree	Uncertain	Agree	Agree	Strongly agree	Strongly agree	Strongly Disagree	Agree	Frequently	Sometimes	Sometimes	Frequently	Completely certain	A slight chance	A good chance	A good chance	A good chance	Completely certain	No	Yes	Yes	No	Yes	No	Yes
hpt162	57	M	Married	Yes	Basic	Private work	3	Diabetes	NHIS	Anti Hypertensive Medication	3	Strongly agree	Agree	Agree	Strongly agree	Agree	Agree	Strongly agree	Agree	Strongly agree	Strongly agree	Agree	Strongly agree	Agree	Agree	Agree	Agree	Disagree	Strongly Disagree	Disagree	Strongly Disagree	Strongly Disagree	Never	Occationally	Occationally	Never	A good chance	A good chance	Completely certain	Completely certain	Completely certain	Completely certain	No	No	No	No	Yes	No	No
hpt163	56	F	Married	No	Basic	Farmer	16	Diabetes	NHIS	Anti Dibetic and Hypertensive medication	16	Agree	Uncertain	Disagree	Agree	Disagree	Agree	Uncertain	Agree	Uncertain	Agree	Strongly agree	Uncertain	Agree	Uncertain	Agree	Uncertain	Agree	Agree	Uncertain	Disagree	Uncertain	Occationally	Occationally	Frequently	Sometimes	A slight chance	Average Chance	A good chance	Average Chance	A slight chance	A good chance	No	No	Yes	No	No	Yes	Yes
hpt164	45	F	Married	Yes	Secondary/Vocational	Private work	5	Diabetes	NHIS	Anti Hypertensive Medication	5	Agree	Strongly agree	Agree	Uncertain	Strongly agree	Agree	Uncertain	Strongly agree	Agree	Strongly agree	Strongly agree	Agree	Strongly agree	Agree	Uncertain	Uncertain	Strongly agree	Agree	Agree	Disagree	Uncertain	Sometimes	Occationally	Rarely	Rarely	Average Chance	A slight chance	A good chance	A slight chance	A good chance	A good chance	No	No	Yes	Yes	No	No	No
hpt165	53	M	Married	Yes	Tertiary	Government work	5	None	NHIS	Anti Hypertensive Medication	5	Disagree	Agree	Disagree	Strongly Disagree	Strongly Disagree	Disagree	Agree	Strongly agree	Agree	Strongly agree	Agree	Strongly agree	Agree	Strongly agree	Agree	Uncertain	Agree	Disagree	Disagree	Disagree	Strongly Disagree	Frequently	Sometimes	Sometimes	Sometimes	Completely certain	A good chance	Completely certain	A good chance	Completely certain	A good chance	No	No	Yes	No	Yes	Yes	No
hpt166	55	M	Married	Yes	Tertiary	Government work	6	None	Private	Anti Hypertensive Medication	6	Disagree	Agree	Disagree	Strongly Disagree	Strongly Disagree	Disagree	Agree	Strongly agree	Agree	Strongly agree	Agree	Strongly agree	Agree	Strongly agree	Agree	Uncertain	Agree	Disagree	Disagree	Disagree	Strongly Disagree	Frequently	Sometimes	Sometimes	Sometimes	Completely certain	A good chance	Completely certain	A good chance	Completely certain	A good chance	No	No	Yes	No	Yes	Yes	No
hpt167	60	M	Married	Yes	Tertiary	Government work	16	Diabetes	Private	Anti Dibetic and Hypertensive medication	16	Agree	Uncertain	Disagree	Agree	Agree	Agree	Agree	Strongly agree	Strongly agree	Strongly agree	Agree	Strongly agree	Agree	Uncertain	Disagree	Uncertain	Agree	Agree	Disagree	Agree	Disagree	Sometimes	Occationally	Frequently	Rarely	Average Chance	A good chance	Completely certain	Average Chance	A good chance	A good chance	No	No	No	No	Yes	No	No
hpt168	45	M	Married	Yes	Tertiary	Government work	5	None	NHIS	Anti Hypertensive Medication	5	Strongly agree	Agree	Agree	Strongly agree	Agree	Uncertain	Strongly agree	Strongly agree	Strongly agree	Strongly agree	Strongly agree	Strongly agree	Strongly agree	Agree	Disagree	Uncertain	Agree	Disagree	Agree	Uncertain	Uncertain	Frequently	Sometimes	Occationally	Frequently	A good chance	A good chance	Average Chance	A good chance	A good chance	Average Chance	No	No	No	No	Yes	No	No
hpt169	66	M	Married	Yes	Tertiary	Government work	5	None	NHIS	Anti Hypertensive Medication	5	Disagree	Agree	Disagree	Agree	Agree	Disagree	Agree	Disagree	Disagree	Disagree	Disagree	Disagree	Disagree	Disagree	Disagree	Disagree	Disagree	Agree	Agree	Agree	Agree	Rarely	Never	Never	Never	No chance at all	A slight chance	A slight chance	A slight chance	No chance at all	A slight chance	Yes	Yes	Yes	Yes	Yes	Yes	Yes
hpt170	70	M	Married	Yes	Tertiary	Government work	12	None	NHIS	Anti Hypertensive Medication	12	Strongly agree	Agree	Agree	Agree	Strongly agree	Agree	Uncertain	Strongly agree	Strongly agree	Strongly agree	Strongly agree	Strongly agree	Strongly agree	Agree	Disagree	Uncertain	Agree	Disagree	Agree	Uncertain	Uncertain	Frequently	Sometimes	Occationally	Frequently	A good chance	A good chance	Average Chance	A good chance	A good chance	Average Chance	No	No	No	No	Yes	No	No
hpt171	58	M	Married	Yes	Secondary/Vocational	Farmer	3	Heart Failure	None	Anti Dibetic and Hypertensive medication	3	Disagree	Disagree	Agree	Disagree	Strongly agree	Agree	Agree	Strongly agree	Agree	Agree	Strongly agree	Agree	Strongly agree	Agree	Uncertain	Agree	Agree	Disagree	Agree	Disagree	Agree	Never	Occationally	Sometimes	Never	Average Chance	A good chance	Average Chance	A good chance	Completely certain	Completely certain	Yes	No	Yes	Yes	Yes	No	No
hpt172	61	M	Married	Yes	Secondary/Vocational	Government work	11	None	NHIS	Anti Hypertensive Medication	11	Agree	Strongly agree	Agree	Uncertain	Agree	Agree	Strongly agree	Strongly agree	Agree	Strongly agree	Agree	Strongly agree	Agree	Strongly agree	Agree	Uncertain	Strongly agree	Disagree	Disagree	Disagree	Strongly Disagree	Sometimes	Frequently	Occationally	Rarely	Average Chance	A good chance	Completely certain	A good chance	Completely certain	Completely certain	No	No	No	No	Yes	Yes	No
hpt173	72	M	Married	Yes	Tertiary	Government work	4	None	NHIS	Anti Dibetic and Hypertensive medication	4	Strongly agree	Agree	Uncertain	Disagree	Agree	Agree	Agree	Strongly agree	Strongly agree	Agree	Strongly agree	Strongly agree	Strongly agree	Agree	Disagree	Agree	Agree	Strongly agree	Strongly agree	Disagree	Strongly agree	Frequently	Occationally	Frequently	Frequently	Average Chance	A good chance	Completely certain	Completely certain	Completely certain	Completely certain	No	No	No	No	Yes	No	No
hpt174	70	M	Married	Yes	Tertiary	Government work	6	None	Private	Anti Hypertensive Medication	6	Strongly agree	Agree	Uncertain	Disagree	Agree	Agree	Agree	Strongly agree	Strongly agree	Agree	Strongly agree	Strongly agree	Strongly agree	Agree	Disagree	Agree	Agree	Strongly agree	Strongly agree	Disagree	Strongly agree	Frequently	Occationally	Frequently	Frequently	Average Chance	A good chance	Completely certain	Completely certain	Completely certain	Completely certain	No	No	No	No	Yes	No	No
hpt175	60	M	Married	Yes	Tertiary	Government work	3	Diabetes	NHIS	Anti Hypertensive Medication	3	Strongly agree	Agree	Uncertain	Disagree	Agree	Agree	Agree	Strongly agree	Strongly agree	Agree	Strongly agree	Strongly agree	Strongly agree	Agree	Disagree	Agree	Agree	Strongly agree	Strongly agree	Disagree	Strongly agree	Frequently	Occationally	Frequently	Frequently	Average Chance	A good chance	Completely certain	Completely certain	Completely certain	Completely certain	No	No	No	No	Yes	No	No
hpt176	38	M	Single	No	Tertiary	Government work	4	None	NHIS	Anti Dibetic and Hypertensive medication	4	Strongly agree	Strongly agree	Agree	Uncertain	Disagree	Agree	Agree	Agree	Strongly agree	Agree	Strongly agree	Strongly agree	Strongly agree	Agree	Disagree	Agree	Agree	Strongly agree	Strongly agree	Disagree	Strongly agree	Frequently	Occationally	Frequently	Frequently	Average Chance	A good chance	Completely certain	Completely certain	Completely certain	Completely certain	No	No	No	No	Yes	No	No
hpt177	38	M	Single	Yes	Secondary/Vocational	Private work	3	None	NHIS	Anti Hypertensive Medication	3	Strongly agree	Strongly agree	Agree	Uncertain	Disagree	Agree	Disagree	Agree	Agree	Agree	Agree	Strongly agree	Strongly agree	Uncertain	Agree	Uncertain	Disagree	Disagree	Agree	Uncertain	Agree	Rarely	Occationally	Frequently	Never	A good chance	Average Chance	A good chance	Average Chance	Completely certain	Completely certain	No	No	No	No	Yes	No	Yes
hpt178	36	M	Single	No	Tertiary	Government work	4	Diabetes	NHIS	Anti Hypertensive Medication	4	Strongly agree	Agree	Uncertain	Disagree	Agree	Agree	Agree	Strongly agree	Strongly agree	Agree	Strongly agree	Strongly agree	Strongly agree	Agree	Disagree	Agree	Agree	Strongly agree	Strongly agree	Disagree	Strongly agree	Frequently	Occationally	Frequently	Frequently	Average Chance	A good chance	Completely certain	Completely certain	Completely certain	Completely certain	No	No	No	No	Yes	No	No
hpt179	45	M	Married	Yes	Non-formal	Farmer	3	None	None	Anti Dibetic and Hypertensive medication	3	Disagree	Disagree	Agree	Disagree	Strongly agree	Agree	Agree	Strongly agree	Agree	Agree	Strongly agree	Agree	Strongly agree	Agree	Uncertain	Agree	Agree	Disagree	Agree	Disagree	Agree	Never	Occationally	Sometimes	Never	Average Chance	A good chance	Average Chance	A good chance	Completely certain	Completely certain	Yes	No	Yes	Yes	Yes	No	No
hpt180	47	M	Married	No	Basic	Private work	2	Diabetes	NHIS	Anti Dibetic and Hypertensive medication	2	Agree	Strongly agree	Uncertain	Agree	Strongly agree	Agree	Strongly agree	Agree	Strongly agree	Agree	Strongly agree	Agree	Strongly agree	Agree	Agree	Strongly agree	Agree	Uncertain	Uncertain	Disagree	Uncertain	Occationally	Sometimes	Occationally	Sometimes	Average Chance	A good chance	Average Chance	A slight chance	Averae Chance	A good chance	No	No	Yes	Yes	No	No	Yes
hpt181	41	M	Married	Yes	Tertiary	Government work	3	None	NHIS	Anti Hypertensive Medication	3	Disagree	Agree	Disagree	Strongly Disagree	Strongly Disagree	Disagree	Agree	Strongly agree	Agree	Strongly agree	Agree	Strongly agree	Agree	Strongly agree	Agree	Uncertain	Agree	Disagree	Disagree	Disagree	Strongly Disagree	Frequently	Sometimes	Sometimes	Sometimes	Completely certain	A good chance	Completely certain	A good chance	Completely certain	A good chance	No	No	Yes	No	Yes	Yes	No
hpt182	50	M	Married	Yes	Tertiary	Government work	6	None	NHIS	Anti Hypertensive Medication	6	Agree	Strongly agree	Agree	Agree	Uncertain	Uncertain	Strongly agree	Agree	Strongly agree	Agree	Strongly agree	Agree	Strongly agree	Disagree	Disagree	Disagree	Uncertain	Disagree	Agree	Agree	Uncertain	Occationally	Sometimes	Frequently	Sometimes	A good chance	Average Chance	A good chance	A good chance	A good chance	Average Chance	No	No	No	No	Yes	No	No
hpt183	59	M	Married	Yes	Tertiary	Government work	9	Diabetes	Private	Anti Dibetic and Hypertensive medication	9	Agree	Strongly agree	Agree	Agree	Uncertain	Uncertain	Strongly agree	Agree	Strongly agree	Agree	Strongly agree	Agree	Strongly agree	Disagree	Disagree	Disagree	Uncertain	Disagree	Agree	Agree	Uncertain	Occationally	Sometimes	Frequently	Sometimes	A good chance	Average Chance	A good chance	A good chance	A good chance	Average Chance	No	No	No	No	Yes	No	No
hpt184	54	M	Married	Yes	Secondary/Vocational	Private work	5	None	NHIS	Anti Hypertensive Medication	5	Disagree	Agree	Disagree	Strongly Disagree	Strongly Disagree	Disagree	Agree	Strongly agree	Agree	Strongly agree	Agree	Strongly agree	Agree	Strongly agree	Agree	Uncertain	Agree	Disagree	Disagree	Disagree	Strongly Disagree	Frequently	Sometimes	Sometimes	Sometimes	Completely certain	A good chance	Completely certain	A good chance	Completely certain	A good chance	No	No	Yes	No	Yes	Yes	No
hpt185	47	M	Married	Yes	Tertiary	Government work	5	Diabetes	NHIS	Anti Dibetic and Hypertensive medication	5	Disagree	Agree	Disagree	Strongly Disagree	Strongly Disagree	Disagree	Agree	Strongly agree	Agree	Strongly agree	Agree	Strongly agree	Agree	Strongly agree	Agree	Uncertain	Agree	Disagree	Disagree	Disagree	Strongly Disagree	Frequently	Sometimes	Sometimes	Sometimes	Completely certain	A good chance	Completely certain	A good chance	Completely certain	A good chance	No	No	Yes	No	Yes	Yes	No
hpt186	48	M	Married	Yes	Secondary/Vocational	Private work	7	None	NHIS	Anti Hypertensive Medication	7	Disagree	Agree	Disagree	Strongly Disagree	Strongly Disagree	Disagree	Agree	Strongly agree	Agree	Strongly agree	Agree	Strongly agree	Agree	Strongly agree	Agree	Uncertain	Agree	Disagree	Disagree	Disagree	Strongly Disagree	Frequently	Sometimes	Sometimes	Sometimes	Completely certain	A good chance	Completely certain	A good chance	Completely certain	A good chance	No	No	Yes	No	Yes	Yes	No
hpt187	66	M	Married	Yes	Tertiary	Government work	5	None	NHIS	Anti Hypertensive Medication	5	Disagree	Agree	Disagree	Agree	Agree	Disagree	Agree	Disagree	Disagree	Disagree	Disagree	Disagree	Disagree	Disagree	Disagree	Disagree	Disagree	Agree	Agree	Agree	Agree	Rarely	Never	Never	Never	No chance at all	A slight chance	A slight chance	A slight chance	No chance at all	A slight chance	Yes	Yes	Yes	Yes	Yes	Yes	Yes
hpt188	47	M	Married	Yes	Secondary/Vocational	Government work	5	None	NHIS	Anti Hypertensive Medication	5	Disagree	Agree	Disagree	Agree	Agree	Disagree	Agree	Disagree	Disagree	Disagree	Disagree	Disagree	Disagree	Disagree	Disagree	Disagree	Disagree	Agree	Agree	Agree	Agree	Rarely	Never	Never	Never	No chance at all	A slight chance	A slight chance	A slight chance	No chance at all	A slight chance	Yes	Yes	Yes	Yes	Yes	Yes	Yes
hpt189	42	M	Married	Yes	Secondary/Vocational	Government work	5	None	NHIS	Anti Hypertensive Medication	5	Disagree	Agree	Disagree	Agree	Agree	Disagree	Agree	Disagree	Disagree	Disagree	Disagree	Disagree	Disagree	Disagree	Disagree	Disagree	Disagree	Agree	Agree	Agree	Agree	Rarely	Never	Never	Never	No chance at all	A slight chance	A slight chance	A slight chance	No chance at all	A slight chance	Yes	Yes	Yes	Yes	Yes	Yes	Yes
hpt190	57	M	Married	Yes	Secondary/Vocational	Farmer	11	Diabetes	NHIS	Anti Dibetic and Hypertensive medication	11	Strongly agree	Strongly agree	Agree	Agree	Agree	Agree	Strongly agree	Strongly agree	Strongly agree	Strongly agree	Strongly agree	Agree	Strongly agree	Strongly agree	Agree	Agree	Agree	Agree	Agree	Uncertain	Agree	Frequently	Sometimes	Frequently	Frequently	A good chance	Completely certain	Completely certain	A good chance	Completely certain	Completely certain	Yes	No	No	No	Yes	No	Yes
hpt191	58	M	Married	Yes	Tertiary	Government work	7	Diabetes	Private	Anti Dibetic and Hypertensive medication	7	Strongly agree	Strongly agree	Agree	Agree	Agree	Agree	Strongly agree	Strongly agree	Strongly agree	Strongly agree	Strongly agree	Agree	Strongly agree	Strongly agree	Agree	Agree	Agree	Agree	Agree	Uncertain	Agree	Frequently	Sometimes	Frequently	Frequently	A good chance	Completely certain	Completely certain	A good chance	Completely certain	Completely certain	Yes	No	No	No	Yes	No	Yes
hpt192	50	M	Married	Yes	Secondary/Vocational	Farmer	6	Diabetes	NHIS	Anti Hypertensive Medication	6	Strongly agree	Strongly agree	Agree	Agree	Agree	Agree	Strongly agree	Strongly agree	Strongly agree	Strongly agree	Strongly agree	Agree	Strongly agree	Strongly agree	Agree	Agree	Agree	Agree	Agree	Uncertain	Agree	Frequently	Sometimes	Frequently	Frequently	A good chance	Completely certain	Completely certain	A good chance	Completely certain	Completely certain	Yes	No	No	No	Yes	No	Yes
hpt193	72	M	Married	Yes	Secondary/Vocational	Farmer	15	None	NHIS	Anti Hypertensive Medication	15	Strongly agree	Strongly agree	Uncertain	Strongly agree	Strongly agree	Strongly agree	Agree	Strongly agree	Strongly agree	Strongly agree	Strongly agree	Strongly agree	Strongly agree	Strongly agree	Agree	Uncertain	Agree	Agree	Agree	Uncertain	Agree	Frequently	Sometimes	Frequently	Frequently	Completely certain	Completely certain	Completely certain	Completely certain	Completely certain	Completely certain	No	No	No	No	Yes	No	Yes
hpt194	56	M	Married	Yes	Basic	Unemployed	10	None	NHIS	Anti Hypertensive Medication	10	Strongly agree	Agree	Agree	Uncertain	Agree	Uncertain	Agree	Strongly agree	Agree	Strongly agree	Agree	Agree	Uncertain	Agree	Uncertain	Agree	Strongly agree	Strongly agree	Agree	Disagree	Agree	Occationally	Rarely	Sometimes	Sometimes	Average Chance	A good chance	Average Chance	A slight chance	Completely certain	Completely certain	No	No	No	No	Yes	No	Yes
hpt195	70	M	Married	Yes	Secondary/Vocational	Farmer	10	Diabetes	NHIS	Anti Hypertensive Medication	10	Strongly agree	Agree	Agree	Uncertain	Agree	Uncertain	Agree	Strongly agree	Agree	Strongly agree	Agree	Agree	Uncertain	Agree	Uncertain	Agree	Strongly agree	Strongly agree	Agree	Disagree	Agree	Occationally	Rarely	Sometimes	Sometimes	Average Chance	A good chance	Average Chance	A slight chance	Completely certain	Completely certain	No	No	No	No	Yes	No	Yes
hpt196	68	M	Married	No	Tertiary	Unemployed	4	Heart Failure	NHIS	Anti Dibetic and Hypertensive medication	4	Strongly Disagree	Uncertain	Uncertain	Agree	Agree	Agree	Agree	Strongly agree	Strongly agree	Strongly agree	Agree	Agree	Strongly agree	Strongly agree	Uncertain	Disagree	Agree	Agree	Agree	Agree	Strongly agree	Occationally	Sometimes	Frequently	Sometimes	A good chance	Average Chance	A slight chance	A good chance	A good chance	Completely certain	No	No	No	Yes	Yes	No	No
hpt197	52	M	Married	Yes	Secondary/Vocational	Private work	5	None	NHIS	Anti Hypertensive Medication	5	Strongly agree	Disagree	Agree	Disagree	Agree	Uncertain	Agree	Strongly agree	Agree	Strongly agree	Agree	Agree	Uncertain	Agree	Uncertain	Agree	Agree	Strongly agree	Strongly agree	Strongly Disagree	Agree	Sometimes	Sometimes	Sometimes	Frequently	Completely certain	A slight chance	A good chance	A good chance	A good chance	Completely certain	No	Yes	Yes	No	Yes	No	Yes
hpt198	50	M	Cohabitating	Yes	Secondary/Vocational	Government work	5	None	NHIS	Anti Hypertensive Medication	5	Disagree	Agree	Disagree	Agree	Agree	Disagree	Agree	Disagree	Disagree	Disagree	Disagree	Disagree	Disagree	Disagree	Disagree	Disagree	Disagree	Agree	Agree	Agree	Agree	Rarely	Never	Never	Never	No chance at all	A slight chance	A slight chance	A slight chance	No chance at all	A slight chance	Yes	Yes	Yes	Yes	Yes	Yes	Yes
hpt199	50	M	Married	Yes	Tertiary	Government work	4	Diabetes	NHIS	Anti Hypertensive Medication	4	Disagree	Agree	Disagree	Strongly Disagree	Strongly Disagree	Disagree	Agree	Strongly agree	Agree	Strongly agree	Agree	Strongly agree	Agree	Strongly agree	Agree	Uncertain	Agree	Disagree	Disagree	Disagree	Strongly Disagree	Frequently	Sometimes	Sometimes	Sometimes	Completely certain	A good chance	Completely certain	A good chance	Completely certain	A good chance	No	No	Yes	No	Yes	Yes	No
hpt200	49	M	Married	Yes	Basic	Farmer	5	None	NHIS	Anti Hypertensive Medication	5	Disagree	Agree	Disagree	Agree	Agree	Disagree	Agree	Disagree	Disagree	Disagree	Disagree	Disagree	Disagree	Disagree	Disagree	Disagree	Disagree	Agree	Agree	Agree	Agree	Rarely	Never	Never	Never	No chance at all	A slight chance	A slight chance	A slight chance	No chance at all	A slight chance	Yes	Yes	Yes	Yes	Yes	Yes	Yes
hpt201	40	M	Single	Yes	Secondary/Vocational	Private work	1	None	NHIS	Anti Hypertensive Medication	1	Strongly agree	Agree	Uncertain	Uncertain	Disagree	Uncertain	Agree	Strongly agree	Agree	Strongly agree	Agree	Agree	Uncertain	Agree	Uncertain	Strongly agree	Agree	Strongly agree	Agree	Disagree	Agree	Occationally	Rarely	Sometimes	Sometimes	Average Chance	A good chance	Average Chance	A slight chance	Completely certain	Completely certain	Yes	No	No	No	Yes	No	Yes
hpt202	38	F	Married	Yes	Tertiary	Government work	0	None	NHIS	Anti Hypertensive Medication	0	Agree	Uncertain	Agree	Disagree	Strongly agree	Strongly agree	Agree	Strongly agree	Strongly agree	Strongly agree	Agree	Agree	Agree	Agree	Agree	Agree	Uncertain	Agree	Agree	Agree	Uncertain	Sometimes	Occationally	Sometimes	Never	A good chance	Average Chance	Average Chance	Average Chance	A good chance	A good chance	Yes	Yes	Yes	Yes	Yes	No	Yes
hpt203	57	F	Married	Yes	Tertiary	Private work	8	Diabetes	NHIS	Anti Hypertensive Medication	8	Agree	Uncertain	Agree	Disagree	Strongly agree	Strongly agree	Agree	Strongly agree	Strongly agree	Strongly agree	Agree	Agree	Agree	Agree	Agree	Agree	Uncertain	Agree	Agree	Agree	Uncertain	Sometimes	Occationally	Sometimes	Never	A good chance	Average Chance	Average Chance	Average Chance	A good chance	A good chance	Yes	Yes	Yes	Yes	Yes	No	Yes
hpt204	40	F	Married	Yes	Tertiary	Government work	1	None	NHIS	Anti Hypertensive Medication	1	Agree	Uncertain	Agree	Disagree	Strongly agree	Strongly agree	Agree	Strongly agree	Strongly agree	Strongly agree	Agree	Agree	Agree	Agree	Agree	Agree	Uncertain	Agree	Agree	Agree	Uncertain	Sometimes	Occationally	Sometimes	Never	A good chance	Average Chance	Average Chance	Average Chance	A good chance	A good chance	Yes	Yes	Yes	Yes	Yes	No	Yes
hpt205	47	F	Seperated/Widowed	Yes	Basic	Private work	5	None	NHIS	Anti Hypertensive Medication	5	Agree	Uncertain	Agree	Disagree	Strongly agree	Strongly agree	Agree	Strongly agree	Strongly agree	Strongly agree	Agree	Agree	Agree	Agree	Agree	Agree	Uncertain	Agree	Agree	Agree	Uncertain	Sometimes	Occationally	Sometimes	Never	A good chance	Average Chance	Average Chance	Average Chance	A good chance	A good chance	Yes	Yes	Yes	Yes	Yes	No	Yes
hpt206	50	F	Married	Yes	Tertiary	Government work	2	None	NHIS	Anti Hypertensive Medication	2	Agree	Uncertain	Agree	Disagree	Strongly agree	Strongly agree	Agree	Strongly agree	Strongly agree	Strongly agree	Agree	Agree	Agree	Agree	Agree	Agree	Uncertain	Agree	Agree	Agree	Uncertain	Sometimes	Occationally	Sometimes	Never	A good chance	Average Chance	Average Chance	Average Chance	A good chance	A good chance	Yes	Yes	Yes	Yes	Yes	No	Yes
hpt207	70	F	Seperated/Widowed	Yes	Non-formal	Farmer	15	Diabetes	NHIS	Anti Dibetic and Hypertensive medication	15	Disagree	Agree	Disagree	Strongly Disagree	Strongly Disagree	Disagree	Agree	Strongly agree	Agree	Strongly agree	Agree	Strongly agree	Agree	Strongly agree	Agree	Uncertain	Agree	Disagree	Disagree	Disagree	Strongly Disagree	Frequently	Sometimes	Sometimes	Sometimes	Completely certain	A good chance	Completely certain	A good chance	Completely certain	A good chance	No	No	Yes	No	Yes	Yes	No
hpt208	48	F	Married	Yes	Basic	Private work	5	None	NHIS	Anti Hypertensive Medication	5	Disagree	Agree	Disagree	Strongly Disagree	Strongly Disagree	Disagree	Agree	Strongly agree	Agree	Strongly agree	Agree	Strongly agree	Agree	Strongly agree	Agree	Uncertain	Agree	Disagree	Disagree	Disagree	Strongly Disagree	Frequently	Sometimes	Sometimes	Sometimes	Completely certain	A good chance	Completely certain	A good chance	Completely certain	A good chance	No	No	Yes	No	Yes	Yes	No
hpt209	60	F	Married	Yes	Basic	Private work	8	None	NHIS	Anti Hypertensive Medication	8	Agree	Strongly agree	Agree	Uncertain	Agree	Agree	Strongly agree	Strongly agree	Agree	Strongly agree	Agree	Strongly agree	Agree	Strongly agree	Agree	Uncertain	Strongly agree	Disagree	Disagree	Disagree	Strongly Disagree	Sometimes	Frequently	Occationally	Rarely	Average Chance	A good chance	Completely certain	A good chance	Completely certain	Completely certain	No	No	No	No	Yes	Yes	No
hpt210	50	F	Married	Yes	Tertiary	Private work	4	None	Private	Anti Hypertensive Medication	4	Disagree	Agree	Disagree	Strongly Disagree	Strongly Disagree	Disagree	Agree	Strongly agree	Agree	Strongly agree	Agree	Strongly agree	Agree	Strongly agree	Agree	Uncertain	Agree	Disagree	Disagree	Disagree	Strongly Disagree	Frequently	Sometimes	Sometimes	Sometimes	Completely certain	A good chance	Completely certain	A good chance	Completely certain	A good chance	No	No	Yes	No	Yes	Yes	No
hpt211	43	F	Married	Yes	Basic	Private work	5	None	NHIS	Anti Hypertensive Medication	5	Strongly agree	Agree	Agree	Uncertain	Agree	Uncertain	Agree	Strongly agree	Agree	Strongly agree	Agree	Agree	Uncertain	Agree	Uncertain	Agree	Strongly agree	Strongly agree	Agree	Disagree	Agree	Occationally	Rarely	Sometimes	Sometimes	Average Chance	A good chance	Average Chance	A slight chance	Completely certain	Completely certain	No	No	No	No	Yes	No	Yes
hpt212	57	F	Married	Yes	Basic	Government work	2	None	NHIS	Anti Hypertensive Medication	2	Strongly agree	Agree	Agree	Uncertain	Agree	Uncertain	Agree	Strongly agree	Agree	Strongly agree	Agree	Agree	Uncertain	Agree	Uncertain	Agree	Strongly agree	Strongly agree	Agree	Disagree	Agree	Occationally	Rarely	Sometimes	Sometimes	Average Chance	A good chance	Average Chance	A slight chance	Completely certain	Completely certain	No	No	No	No	Yes	No	Yes
hpt213	41	F	Married	Yes	Non-formal	Private work	2	None	NHIS	Anti Hypertensive Medication	2	Strongly agree	Agree	Agree	Uncertain	Agree	Uncertain	Agree	Strongly agree	Agree	Strongly agree	Agree	Agree	Uncertain	Agree	Uncertain	Agree	Strongly agree	Strongly agree	Agree	Disagree	Agree	Occationally	Rarely	Sometimes	Sometimes	Average Chance	A good chance	Average Chance	A slight chance	Completely certain	Completely certain	No	No	No	No	Yes	No	Yes
hpt214	43	F	Married	Yes	Tertiary	Government work	3	None	NHIS	Anti Hypertensive Medication	3	Strongly agree	Agree	Agree	Uncertain	Agree	Uncertain	Agree	Strongly agree	Agree	Strongly agree	Agree	Agree	Uncertain	Agree	Uncertain	Agree	Strongly agree	Strongly agree	Agree	Disagree	Agree	Occationally	Rarely	Sometimes	Sometimes	Average Chance	A good chance	Average Chance	A slight chance	Completely certain	Completely certain	No	No	No	No	Yes	No	Yes
hpt215	60	F	Married	Yes	Secondary/Vocational	Farmer	11	Diabetes	NHIS	Anti Hypertensive Medication	11	Strongly agree	Agree	Agree	Uncertain	Agree	Uncertain	Agree	Strongly agree	Agree	Strongly agree	Agree	Agree	Uncertain	Agree	Uncertain	Agree	Strongly agree	Strongly agree	Agree	Disagree	Agree	Occationally	Rarely	Sometimes	Sometimes	Average Chance	A good chance	Average Chance	A slight chance	Completely certain	Completely certain	No	No	No	No	Yes	No	Yes
hpt216	51	F	Married	Yes	Basic	Private work	4	Diabetes	NHIS	Anti Dibetic and Hypertensive medication	4	Strongly agree	Agree	Agree	Uncertain	Agree	Uncertain	Agree	Strongly agree	Agree	Strongly agree	Agree	Agree	Uncertain	Agree	Uncertain	Agree	Strongly agree	Strongly agree	Agree	Disagree	Agree	Occationally	Rarely	Sometimes	Sometimes	Average Chance	A good chance	Average Chance	A slight chance	Completely certain	Completely certain	No	No	No	No	Yes	No	Yes
hpt217	43	F	Married	Yes	Basic	Government work	3	None	NHIS	Anti Dibetic and Hypertensive medication	3	Strongly agree	Agree	Agree	Uncertain	Agree	Uncertain	Agree	Strongly agree	Agree	Strongly agree	Agree	Agree	Uncertain	Agree	Uncertain	Agree	Strongly agree	Strongly agree	Agree	Disagree	Agree	Occationally	Rarely	Sometimes	Sometimes	Average Chance	A good chance	Average Chance	A slight chance	Completely certain	Completely certain	No	No	No	No	Yes	No	Yes
hpt218	60	F	Married	Yes	Basic	Private work	7	None	NHIS	Anti Hypertensive Medication	7	Strongly agree	Agree	Agree	Uncertain	Agree	Uncertain	Agree	Strongly agree	Agree	Strongly agree	Agree	Agree	Uncertain	Agree	Uncertain	Agree	Strongly agree	Strongly agree	Agree	Disagree	Agree	Occationally	Rarely	Sometimes	Sometimes	Average Chance	A good chance	Average Chance	A slight chance	Completely certain	Completely certain	No	No	No	No	Yes	No	Yes
hpt219	70	F	Seperated/Widowed	Yes	Non-formal	Farmer	9	Diabetes	NHIS	Anti Hypertensive Medication	9	Strongly agree	Agree	Agree	Uncertain	Agree	Uncertain	Agree	Strongly agree	Agree	Strongly agree	Agree	Agree	Uncertain	Agree	Uncertain	Agree	Strongly agree	Strongly agree	Agree	Disagree	Agree	Occationally	Rarely	Sometimes	Sometimes	Average Chance	A good chance	Average Chance	A slight chance	Completely certain	Completely certain	No	No	No	No	Yes	No	Yes
hpt220	62	F	Married	Yes	Non-formal	Farmer	2	None	NHIS	Anti Hypertensive Medication	2	Agree	Agree	Agree	Uncertain	Disagree	Disagree	Disagree	Agree	Agree	Disagree	Disagree	Disagree	Disagree	Disagree	Disagree	Disagree	Disagree	Agree	Agree	Agree	Agree	Rarely	Never	Rarely	Never	No chance at all	No chance at all	No chance at all	A slight chance	No chance at all	A slight chance	Yes	Yes	Yes	Yes	Yes	Yes	Yes
hpt221	61	F	Married	Yes	Basic	Government work	2	None	NHIS	Anti Hypertensive Medication	2	Agree	Agree	Agree	Uncertain	Disagree	Disagree	Disagree	Agree	Agree	Disagree	Disagree	Disagree	Disagree	Disagree	Disagree	Disagree	Disagree	Agree	Agree	Agree	Agree	Rarely	Never	Rarely	Never	No chance at all	No chance at all	No chance at all	A slight chance	No chance at all	A slight chance	Yes	Yes	Yes	Yes	Yes	Yes	Yes
hpt222	57	F	Married	Yes	Basic	Private work	2	None	NHIS	Anti Hypertensive Medication	2	Agree	Agree	Agree	Uncertain	Disagree	Disagree	Disagree	Agree	Agree	Disagree	Disagree	Disagree	Disagree	Disagree	Disagree	Disagree	Disagree	Agree	Agree	Agree	Agree	Rarely	Never	Rarely	Never	No chance at all	No chance at all	No chance at all	A slight chance	No chance at all	A slight chance	Yes	Yes	Yes	Yes	Yes	Yes	Yes
hpt223	50	F	Married	Yes	Basic	Private work	2	None	NHIS	Anti Hypertensive Medication	2	Agree	Agree	Agree	Uncertain	Disagree	Disagree	Disagree	Agree	Agree	Disagree	Disagree	Disagree	Disagree	Disagree	Disagree	Disagree	Disagree	Agree	Agree	Agree	Agree	Rarely	Never	Rarely	Never	No chance at all	No chance at all	No chance at all	A slight chance	No chance at all	A slight chance	Yes	Yes	Yes	Yes	Yes	Yes	Yes
hpt224	49	F	Married	Yes	Basic	Private work	2	None	NHIS	Anti Hypertensive Medication	2	Agree	Agree	Agree	Uncertain	Disagree	Disagree	Disagree	Agree	Agree	Disagree	Disagree	Disagree	Disagree	Disagree	Disagree	Disagree	Disagree	Agree	Agree	Agree	Agree	Rarely	Never	Rarely	Never	No chance at all	No chance at all	No chance at all	A slight chance	No chance at all	A slight chance	Yes	Yes	Yes	Yes	Yes	Yes	Yes
hpt225	45	F	Married	Yes	Basic	Private work	2	None	NHIS	Anti Hypertensive Medication	2	Agree	Agree	Agree	Uncertain	Disagree	Disagree	Disagree	Agree	Agree	Disagree	Disagree	Disagree	Disagree	Disagree	Disagree	Disagree	Disagree	Agree	Agree	Agree	Agree	Rarely	Never	Rarely	Never	No chance at all	No chance at all	No chance at all	A slight chance	No chance at all	A slight chance	Yes	Yes	Yes	Yes	Yes	Yes	Yes
hpt226	50	F	Married	Yes	Tertiary	Government work	2	None	NHIS	Anti Hypertensive Medication	2	Agree	Agree	Agree	Uncertain	Disagree	Disagree	Disagree	Agree	Agree	Disagree	Disagree	Disagree	Disagree	Disagree	Disagree	Disagree	Disagree	Agree	Agree	Agree	Agree	Rarely	Never	Rarely	Never	No chance at all	No chance at all	No chance at all	A slight chance	No chance at all	A slight chance	Yes	Yes	Yes	Yes	Yes	Yes	Yes
hpt227	62	F	Married	Yes	Secondary/Vocational	Government work	2	None	NHIS	Anti Hypertensive Medication	2	Agree	Agree	Agree	Uncertain	Disagree	Disagree	Disagree	Agree	Agree	Disagree	Disagree	Disagree	Disagree	Disagree	Disagree	Disagree	Disagree	Agree	Agree	Agree	Agree	Rarely	Never	Rarely	Never	No chance at all	No chance at all	No chance at all	A slight chance	No chance at all	A slight chance	Yes	Yes	Yes	Yes	Yes	Yes	Yes
hpt228	61	F	Married	Yes	Basic	Farmer	2	Diabetes	NHIS	Anti Hypertensive Medication	2	Agree	Agree	Agree	Uncertain	Disagree	Disagree	Disagree	Agree	Agree	Disagree	Disagree	Disagree	Disagree	Disagree	Disagree	Disagree	Disagree	Agree	Agree	Agree	Agree	Rarely	Never	Rarely	Never	No chance at all	No chance at all	No chance at all	A slight chance	No chance at all	A slight chance	Yes	Yes	Yes	Yes	Yes	Yes	Yes
hpt229	50	F	Married	Yes	Secondary/Vocational	Government work	2	None	NHIS	Anti Hypertensive Medication	2	Agree	Agree	Agree	Uncertain	Disagree	Disagree	Disagree	Agree	Agree	Disagree	Disagree	Disagree	Disagree	Disagree	Disagree	Disagree	Disagree	Agree	Agree	Agree	Agree	Rarely	Never	Rarely	Never	No chance at all	No chance at all	No chance at all	A slight chance	No chance at all	A slight chance	Yes	Yes	Yes	Yes	Yes	Yes	Yes
hpt230	49	M	Married	Yes	Secondary/Vocational	Private work	6	Diabetes	NHIS	Anti Dibetic and Hypertensive medication	6	Disagree	Agree	Disagree	Strongly Disagree	Strongly Disagree	Disagree	Agree	Strongly agree	Agree	Strongly agree	Agree	Strongly agree	Agree	Strongly agree	Agree	Uncertain	Agree	Disagree	Disagree	Disagree	Strongly Disagree	Frequently	Sometimes	Sometimes	Sometimes	Completely certain	A good chance	Completely certain	A good chance	Completely certain	A good chance	No	No	Yes	No	Yes	Yes	No
hpt231	73	F	Seperated/Widowed	Yes	Basic	Farmer	1	None	None	Anti Hypertensive Medication	1	Agree	Agree	Strongly agree	Uncertain	Agree	Strongly agree	Agree	Agree	Agree	Strongly agree	Agree	Agree	Strongly agree	Agree	Strongly agree	Agree	Uncertain	Disagree	Disagree	Uncertain	Strongly Disagree	Frequently	Sometimes	Sometimes	Never	Completely certain	A good chance	A good chance	Completely certain	A good chance	Completely certain	No	No	No	No	Yes	No	No
hpt232	75	F	Seperated/Widowed	Yes	Basic	Unemployed	9	None	NHIS	Anti Hypertensive Medication	9	Uncertain	Agree	Disagree	Uncertain	Agree	Uncertain	Agree	Strongly agree	Strongly agree	Strongly agree	Agree	Agree	Strongly agree	Agree	Agree	Strongly agree	Strongly Disagree	Strongly Disagree	Disagree	Agree	Disagree	Occationally	Never	Sometimes	Never	Completely certain	Completely certain	Completely certain	A good chance	Completely certain	No chance at all	No	No	Yes	No	Yes	Yes	No
hpt233	61	F	Married	Yes	Basic	Farmer	2	Diabetes	NHIS	Anti Hypertensive Medication	2	Disagree	Disagree	Strongly Disagree	Strongly Disagree	Agree	Agree	Agree	Agree	Agree	Strongly agree	Agree	Agree	Agree	Agree	Strongly agree	Agree	Agree	Strongly Disagree	Disagree	Uncertain	Strongly Disagree	Occationally	Never	Sometimes	Never	A good chance	Completely certain	A good chance	A good chance	Completely certain	Completely certain	No	No	No	Yes	Yes	Yes	No
hpt234	66	F	Married	Yes	Basic	Private work	6	Diabetes	NHIS	Anti Hypertensive Medication	6	Disagree	Disagree	Strongly Disagree	Strongly Disagree	Agree	Agree	Agree	Agree	Agree	Strongly agree	Agree	Agree	Agree	Agree	Strongly agree	Agree	Agree	Strongly Disagree	Disagree	Uncertain	Strongly Disagree	Occationally	Never	Sometimes	Never	A good chance	Completely certain	A good chance	A good chance	Completely certain	Completely certain	No	No	No	Yes	Yes	Yes	No
hpt235	52	M	Married	No	Basic	Farmer	8	Diabetes	NHIS	Anti Hypertensive Medication	8	Strongly agree	Strongly agree	Strongly agree	Strongly agree	Strongly agree	Strongly agree	Strongly agree	Agree	Strongly agree	Strongly agree	Strongly agree	Strongly agree	Strongly agree	Strongly agree	Strongly agree	Strongly agree	Strongly agree	Strongly agree	Strongly agree	Uncertain	Uncertain	Occationally	Never	Never	Never	A good chance	A good chance	A good chance	A good chance	A good chance	Completely certain	Yes	No	No	No	Yes	Yes	No
hpt236	45	F	Married	Yes	Basic	Private work	2	None	NHIS	Anti Hypertensive Medication	2	Agree	Agree	Agree	Uncertain	Disagree	Disagree	Disagree	Agree	Agree	Disagree	Disagree	Disagree	Disagree	Disagree	Disagree	Disagree	Disagree	Agree	Agree	Agree	Agree	Rarely	Never	Rarely	Never	No chance at all	No chance at all	No chance at all	A slight chance	No chance at all	A slight chance	Yes	Yes	Yes	Yes	Yes	Yes	Yes
hpt237	50	F	Seperated/Widowed	Yes	Basic	Farmer	2	Diabetes	NHIS	Anti Hypertensive Medication	2	Agree	Agree	Agree	Uncertain	Disagree	Disagree	Disagree	Agree	Agree	Disagree	Disagree	Disagree	Disagree	Disagree	Disagree	Disagree	Disagree	Agree	Agree	Agree	Agree	Rarely	Never	Rarely	Never	No chance at all	No chance at all	No chance at all	A slight chance	No chance at all	A slight chance	Yes	Yes	Yes	Yes	Yes	Yes	Yes
hpt238	55	F	Married	Yes	Basic	Private work	2	None	NHIS	Anti Hypertensive Medication	2	Agree	Agree	Agree	Uncertain	Disagree	Disagree	Disagree	Agree	Agree	Disagree	Disagree	Disagree	Disagree	Disagree	Disagree	Disagree	Disagree	Agree	Agree	Agree	Agree	Rarely	Never	Rarely	Never	No chance at all	No chance at all	No chance at all	A slight chance	No chance at all	A slight chance	Yes	Yes	Yes	Yes	Yes	Yes	Yes
hpt239	60	F	Married	Yes	Basic	Government work	2	None	NHIS	Anti Hypertensive Medication	2	Agree	Agree	Agree	Uncertain	Disagree	Disagree	Disagree	Agree	Agree	Disagree	Disagree	Disagree	Disagree	Disagree	Disagree	Disagree	Disagree	Agree	Agree	Agree	Agree	Rarely	Never	Rarely	Never	No chance at all	No chance at all	No chance at all	A slight chance	No chance at all	A slight chance	Yes	Yes	Yes	Yes	Yes	Yes	Yes
hpt240	30	F	Single	Yes	Tertiary	Student	3	None	NHIS	Anti Hypertensive Medication	3	Strongly agree	Disagree	Agree	Disagree	Agree	Disagree	Agree	Strongly agree	Agree	Strongly agree	Agree	Agree	Uncertain	Agree	Uncertain	Agree	Agree	Strongly agree	Strongly agree	Strongly Disagree	Agree	Frequently	Sometimes	Sometimes	Frequently	Completely certain	A slight chance	A good chance	A good chance	A good chance	Completely certain	No	Yes	Yes	No	Yes	No	Yes
hpt241	40	F	Married	Yes	Secondary/Vocational	Private work	4	None	NHIS	Anti Hypertensive Medication	4	Strongly Disagree	Uncertain	Uncertain	Agree	Agree	Agree	Agree	Strongly agree	Strongly agree	Strongly agree	Agree	Agree	Strongly agree	Strongly agree	Uncertain	Disagree	Agree	Agree	Agree	Agree	Strongly agree	Occationally	Sometimes	Frequently	Sometimes	A good chance	Average Chance	A slight chance	A good chance	A good chance	Completely certain	No	No	No	Yes	Yes	No	No
hpt242	68	F	Married	Yes	Basic	Unemployed	13	Heart Failure	NHIS	Anti Hypertensive Medication	13	Strongly Disagree	Uncertain	Uncertain	Agree	Agree	Agree	Agree	Strongly agree	Strongly agree	Strongly agree	Agree	Agree	Strongly agree	Strongly agree	Uncertain	Disagree	Agree	Agree	Agree	Agree	Strongly agree	Occationally	Sometimes	Frequently	Sometimes	A good chance	Average Chance	A slight chance	A good chance	A good chance	Completely certain	No	No	No	Yes	Yes	No	No
hpt243	62	F	Married	Yes	Tertiary	Government work	11	Diabetes	Private	Anti Dibetic and Hypertensive medication	11	Agree	Strongly agree	Agree	Agree	Agree	Uncertain	Uncertain	Strongly agree	Agree	Strongly agree	Agree	Strongly agree	Agree	Disagree	Disagree	Disagree	Agree	Disagree	Agree	Agree	Uncertain	Occationally	Sometimes	Frequently	Frequently	A good chance	Average Chance	A good chance	A good chance	A good chance	Average Chance	No	No	No	No	Yes	No	No
hpt244	65	F	Married	Yes	Basic	Farmer	14	Diabetes	NHIS	Anti Dibetic and Hypertensive medication	14	Strongly agree	Disagree	Agree	Disagree	Agree	Uncertain	Agree	Strongly agree	Agree	Strongly agree	Agree	Agree	Uncertain	Agree	Uncertain	Agree	Agree	Strongly agree	Strongly agree	Strongly Disagree	Agree	Frequently	Sometimes	Sometimes	Frequently	Completely certain	A slight chance	A good chance	A good chance	A good chance	Completely certain	No	Yes	Yes	No	Yes	No	Yes
hpt245	40	F	Married	Yes	Tertiary	Farmer	6	None	Private	Anti Hypertensive Medication	6	Strongly agree	Disagree	Agree	Disagree	Agree	Disagree	Agree	Strongly agree	Uncertain	Strongly agree	Agree	Agree	Uncertain	Agree	Uncertain	Agree	Agree	Strongly agree	Strongly agree	Strongly Disagree	Agree	Frequently	Sometimes	Sometimes	Frequently	Completely certain	A slight chance	A good chance	A good chance	A good chance	Completely certain	No	Yes	Yes	No	Yes	No	Yes
hpt246	49	F	Married	Yes	Secondary/Vocational	Farmer	8	None	NHIS	Anti Hypertensive Medication	8	Strongly agree	Disagree	Agree	Disagree	Agree	Disagree	Agree	Strongly agree	Uncertain	Strongly agree	Agree	Agree	Uncertain	Agree	Uncertain	Agree	Agree	Strongly agree	Strongly agree	Strongly Disagree	Agree	Frequently	Sometimes	Sometimes	Frequently	Completely certain	A slight chance	A good chance	A good chance	A good chance	Completely certain	No	Yes	Yes	No	Yes	No	Yes
hpt247	55	F	Married	Yes	Secondary/Vocational	Farmer	3	Diabetes	NHIS	Anti Dibetic and Hypertensive medication	3	Strongly Disagree	Disagree	Disagree	Uncertain	Agree	Agree	Agree	Strongly agree	Strongly agree	Strongly agree	Agree	Agree	Strongly agree	Strongly agree	Uncertain	Disagree	Agree	Agree	Agree	Agree	Strongly agree	Occationally	Sometimes	Frequently	Sometimes	A good chance	Average Chance	A slight chance	A good chance	A good chance	Completely certain	Yes	No	No	Yes	Yes	No	No
hpt248	40	F	Single	Yes	Secondary/Vocational	Private work	4	None	NHIS	Anti Hypertensive Medication	4	Strongly agree	Disagree	Agree	Disagree	Agree	Disagree	Agree	Strongly agree	Uncertain	Strongly agree	Agree	Agree	Uncertain	Agree	Uncertain	Agree	Agree	Strongly agree	Strongly agree	Strongly Disagree	Agree	Frequently	Sometimes	Sometimes	Frequently	Completely certain	A slight chance	A good chance	A good chance	A good chance	Completely certain	No	Yes	Yes	No	Yes	No	Yes
hpt249	38	F	Single	Yes	Tertiary	Student	4	None	NHIS	Anti Hypertensive Medication	4	Strongly agree	Disagree	Agree	Disagree	Agree	Disagree	Agree	Strongly agree	Uncertain	Strongly agree	Agree	Agree	Uncertain	Agree	Uncertain	Agree	Agree	Strongly agree	Strongly agree	Strongly Disagree	Agree	Frequently	Sometimes	Sometimes	Frequently	Completely certain	A slight chance	A good chance	A good chance	A good chance	Completely certain	No	Yes	Yes	No	Yes	No	Yes
hpt250	38	F	Married	Yes	Tertiary	Government work	3	None	Private	Anti Hypertensive Medication	2.5	Disagree	Agree	Strongly Disagree	Agree	Agree	Strongly agree	Agree	Strongly agree	Agree	Strongly agree	Strongly agree	Strongly agree	Agree	Strongly agree	Agree	Uncertain	Agree	Disagree	Strongly Disagree	Disagree	Strongly Disagree	Frequently	Frequently	Sometimes	Occationally	A good chance	Average Chance	A good chance	Completely certain	Averae Chance	Completely certain	No	No	Yes	Yes	Yes	No	Yes
hpt251	56	F	Seperated/Widowed	Yes	Non-formal	Farmer	10	Diabetes	NHIS	Anti Hypertensive Medication	#NULL!	Agree	Agree	Disagree	Agree	Agree	Agree	Strongly agree	Disagree	Agree	Strongly agree	Agree	Strongly agree	Strongly agree	Strongly agree	Strongly agree	Agree	Strongly Disagree	Disagree	Disagree	Strongly Disagree	Strongly Disagree	Frequently	Rarely	Sometimes	Never	A good chance	Completely certain	A good chance	Completely certain	A good chance	A good chance	No	No	No	No	Yes	Yes	No
hpt252	57	F	Married	Yes	Non-formal	Private work	1	Diabetes	NHIS	Anti Dibetic and Hypertensive medication	1	Strongly agree	Agree	Agree	Uncertain	Agree	Agree	Strongly agree	Strongly agree	Agree	Strongly agree	Agree	Strongly agree	Agree	Agree	Agree	Agree	Agree	Strongly Disagree	Disagree	Agree	Uncertain	Occationally	Sometimes	Occationally	Never	Completely certain	A good chance	A good chance	Completely certain	Completely certain	Completely certain	Yes	Yes	Yes	No	No	Yes	No
hpt253	56	F	Seperated/Widowed	Yes	Non-formal	Farmer	7	None	NHIS	Anti Hypertensive Medication	7	Disagree	Uncertain	Agree	Uncertain	Agree	Agree	Strongly agree	Agree	Strongly agree	Strongly agree	Agree	Strongly agree	Agree	Agree	Agree	Agree	Strongly Disagree	Strongly Disagree	Strongly Disagree	Disagree	Strongly Disagree	Rarely	Never	Never	Never	Completely certain	A good chance	Completely certain	A good chance	Completely certain	A good chance	No	No	No	No	No	Yes	No
hpt254	50	F	Married	Yes	Basic	Government work	4	None	NHIS	Anti Hypertensive Medication	4	Disagree	Agree	Disagree	Agree	Disagree	Disagree	Agree	Agree	Strongly agree	Strongly agree	Agree	Agree	Strongly agree	Agree	Strongly agree	Uncertain	Agree	Disagree	Disagree	Disagree	Strongly Disagree	Never	Sometimes	Occationally	Never	A good chance	Completely certain	A good chance	Completely certain	Completely certain	Completely certain	No	No	No	No	Yes	Yes	No
hpt255	56	F	Seperated/Widowed	Yes	Non-formal	Farmer	12	Diabetes	NHIS	Anti Hypertensive Medication	12	Strongly agree	Agree	Agree	Agree	Strongly agree	Agree	Agree	Strongly agree	Agree	Strongly agree	Agree	Strongly agree	Agree	Agree	Agree	Agree	Strongly Disagree	Disagree	Disagree	Uncertain	Uncertain	Rarely	Frequently	Frequently	Never	A good chance	Completely certain	A good chance	Completely certain	A good chance	Completely certain	No	No	No	No	Yes	No	No
hpt256	50	F	Single	Yes	Tertiary	Government work	5	Diabetes	NHIS	Anti Dibetic and Hypertensive medication	5	Disagree	Disagree	Strongly agree	Strongly agree	Strongly agree	Agree	Agree	Strongly agree	Agree	Strongly agree	Strongly agree	Strongly agree	Strongly agree	Agree	Agree	Agree	Strongly Disagree	Disagree	Disagree	Uncertain	Uncertain	Rarely	Never	Never	Never	Average Chance	Average Chance	Average Chance	Average Chance	Averae Chance	Average Chance	No	No	No	No	No	No	No
hpt257	50	M	Married	Yes	Tertiary	Private work	5	None	NHIS	Anti Dibetic and Hypertensive medication	5	Disagree	Strongly Disagree	Agree	Disagree	Agree	Agree	Disagree	Strongly agree	Strongly agree	Agree	Strongly agree	Strongly agree	Strongly agree	Agree	Disagree	Agree	Disagree	Uncertain	Agree	Disagree	Strongly agree	Frequently	Never	Sometimes	Frequently	Average Chance	A good chance	Average Chance	A good chance	Completely certain	A good chance	Yes	No	Yes	No	No	Yes	Yes
hpt258	56	F	Seperated/Widowed	Yes	Non-formal	Unemployed	22	Heart Failure	NHIS	Anti Hypertensive Medication	22	Strongly agree	Disagree	Agree	Disagree	Agree	Uncertain	Agree	Strongly agree	Agree	Strongly agree	Agree	Agree	Uncertain	Agree	Uncertain	Agree	Agree	Strongly agree	Strongly agree	Strongly Disagree	Strongly agree	Frequently	Sometimes	Sometimes	Frequently	Completely certain	A slight chance	A good chance	A good chance	A good chance	Completely certain	No	Yes	Yes	No	Yes	No	Yes
hpt259	55	F	Married	Yes	Basic	Private work	9	Diabetes	NHIS	Anti Dibetic and Hypertensive medication	9	Strongly agree	Disagree	Agree	Disagree	Agree	Uncertain	Agree	Strongly agree	Agree	Strongly agree	Agree	Agree	Uncertain	Agree	Uncertain	Agree	Agree	Strongly agree	Strongly agree	Strongly Disagree	Strongly agree	Frequently	Sometimes	Sometimes	Frequently	Completely certain	A slight chance	A good chance	A good chance	A good chance	Completely certain	No	Yes	Yes	No	Yes	No	Yes
hpt260	47	F	Single	Yes	Basic	Farmer	2	None	None	Anti Hypertensive Medication	2	Uncertain	Disagree	Agree	Disagree	Agree	Agree	Agree	Strongly agree	Strongly agree	Agree	Agree	Strongly agree	Strongly agree	Uncertain	Agree	Disagree	Agree	Agree	Agree	Strongly agree	Uncertain	Occationally	Frequently	Sometimes	Never	A good chance	A good chance	Average Chance	Average Chance	A good chance	Completely certain	Yes	No	Yes	Yes	Yes	No	Yes
hpt261	32	F	Single	Yes	Basic	Farmer	3	None	None	Anti Hypertensive Medication	3	Agree	Agree	Agree	Strongly agree	Strongly agree	Uncertain	Agree	Disagree	Agree	Agree	Agree	Strongly agree	Strongly agree	Uncertain	Agree	Disagree	Agree	Agree	Agree	Strongly agree	Uncertain	Occationally	Frequently	Sometimes	Never	A good chance	A good chance	Average Chance	Average Chance	A good chance	Completely certain	Yes	No	Yes	Yes	Yes	No	Yes
hpt262	35	F	Single	No	Basic	Private work	4	Heart Failure	None	Anti Hypertensive Medication	4	Agree	Uncertain	Uncertain	Disagree	Agree	Agree	Agree	Strongly agree	Strongly agree	Agree	Agree	Strongly agree	Strongly agree	Agree	Disagree	Uncertain	Agree	Strongly agree	Agree	Agree	Strongly agree	Occationally	Sometimes	Frequently	Never	A slight chance	Average Chance	A good chance	Completely certain	Completely certain	A good chance	Yes	No	Yes	No	No	Yes	Yes
hpt263	34	F	Single	No	Secondary/Vocational	Private work	3	None	NHIS	Anti Hypertensive Medication	3	Disagree	Agree	Strongly agree	Strongly agree	Agree	Strongly agree	Strongly agree	Strongly agree	Strongly agree	Strongly agree	Agree	Strongly agree	Strongly agree	Agree	Agree	Agree	Agree	Strongly agree	Agree	Agree	Agree	Occationally	Sometimes	Occationally	Frequently	Average Chance	A good chance	Completely certain	Completely certain	Completely certain	Completely certain	Yes	No	No	No	Yes	Yes	No
hpt264	42	F	Married	Yes	Tertiary	Government work	2	Diabetes	NHIS	Anti Hypertensive Medication	2	Strongly agree	Strongly agree	Disagree	Strongly agree	Strongly agree	Strongly agree	Agree	Strongly agree	Strongly agree	Strongly agree	Strongly agree	Strongly agree	Strongly agree	Strongly agree	Agree	Uncertain	Agree	Agree	Agree	Uncertain	Agree	Frequently	Sometimes	Frequently	Frequently	Completely certain	Completely certain	Completely certain	Completely certain	Completely certain	Completely certain	No	No	No	No	Yes	No	Yes
hpt265	40	F	Married	Yes	Basic	Farmer	2	Diabetes	NHIS	Anti Dibetic and Hypertensive medication	2	Uncertain	Disagree	Agree	Disagree	Agree	Agree	Agree	Strongly agree	Strongly agree	Agree	Agree	Strongly agree	Strongly agree	Uncertain	Agree	Disagree	Agree	Agree	Agree	Strongly agree	Uncertain	Occationally	Frequently	Sometimes	Never	A good chance	A good chance	Average Chance	Average Chance	A good chance	Completely certain	Yes	No	Yes	Yes	Yes	No	Yes
hpt266	47	F	Married	Yes	Secondary/Vocational	Private work	5	None	NHIS	Anti Dibetic and Hypertensive medication	5	Strongly agree	Strongly agree	Strongly agree	Agree	Agree	Strongly agree	Strongly agree	Strongly agree	Agree	Strongly agree	Strongly agree	Agree	Strongly agree	Strongly agree	Agree	Agree	Agree	Agree	Agree	Uncertain	Agree	Frequently	Sometimes	Frequently	Frequently	A good chance	Completely certain	Completely certain	A good chance	Completely certain	Completely certain	Yes	No	No	No	Yes	No	Yes
hpt267	49	F	Married	Yes	Basic	Government work	8	Diabetes	NHIS	Anti Dibetic and Hypertensive medication	8	Agree	Agree	Strongly agree	Strongly agree	Agree	Strongly agree	Strongly agree	Strongly agree	Agree	Strongly agree	Agree	Strongly agree	Strongly agree	Agree	Agree	Agree	Agree	Strongly agree	Agree	Agree	Agree	Never	Never	Rarely	Rarely	A good chance	A good chance	A good chance	A good chance	A good chance	A good chance	Yes	Yes	No	No	Yes	Yes	No
hpt268	46	F	Married	Yes	Basic	Private work	2	Diabetes	None	Anti Dibetic and Hypertensive medication	2	Agree	Agree	Strongly agree	Strongly agree	Agree	Strongly agree	Strongly agree	Strongly agree	Agree	Strongly agree	Agree	Strongly agree	Strongly agree	Agree	Agree	Agree	Agree	Strongly agree	Agree	Agree	Agree	Occationally	Sometimes	Occationally	Frequently	Average Chance	A good chance	Completely certain	Completely certain	Completely certain	Completely certain	Yes	No	No	No	Yes	Yes	No
hpt269	70	F	Married	Yes	Tertiary	Government work	10	Diabetes	NHIS	Anti Dibetic and Hypertensive medication	10	Strongly agree	Strongly agree	Disagree	Strongly agree	Strongly agree	Strongly agree	Agree	Strongly agree	Strongly agree	Strongly agree	Strongly agree	Strongly agree	Strongly agree	Strongly agree	Agree	Uncertain	Agree	Agree	Agree	Uncertain	Agree	Frequently	Sometimes	Frequently	Frequently	Completely certain	Completely certain	Completely certain	Completely certain	Completely certain	Completely certain	No	No	No	No	Yes	No	Yes
hpt270	54	F	Married	Yes	Tertiary	Government work	5	None	NHIS	Anti Dibetic and Hypertensive medication	5	Strongly agree	Strongly agree	Disagree	Strongly agree	Strongly agree	Strongly agree	Agree	Strongly agree	Strongly agree	Strongly agree	Strongly agree	Strongly agree	Strongly agree	Strongly agree	Agree	Uncertain	Agree	Agree	Agree	Uncertain	Agree	Frequently	Sometimes	Frequently	Frequently	Completely certain	Completely certain	Completely certain	Completely certain	Completely certain	Completely certain	No	No	No	No	Yes	No	Yes
hpt271	60	F	Seperated/Widowed	Yes	Basic	Farmer	6	Diabetes	NHIS	Anti Hypertensive Medication	6	Uncertain	Disagree	Agree	Disagree	Agree	Agree	Agree	Strongly agree	Strongly agree	Agree	Agree	Strongly agree	Strongly agree	Uncertain	Agree	Disagree	Agree	Agree	Agree	Strongly agree	Uncertain	Occationally	Frequently	Sometimes	Never	A good chance	A good chance	Average Chance	Average Chance	A good chance	Completely certain	Yes	No	Yes	Yes	Yes	No	Yes
hpt272	40	F	Married	Yes	Tertiary	Government work	8	Renal Failure	NHIS	Anti Hypertensive Medication	8	Strongly agree	Agree	Uncertain	Disagree	Agree	Agree	Agree	Strongly agree	Strongly agree	Agree	Strongly agree	Strongly agree	Strongly agree	Agree	Disagree	Strongly agree	Strongly agree	Strongly agree	Strongly agree	Disagree	Strongly agree	Frequently	Occationally	Frequently	Frequently	Average Chance	A good chance	Completely certain	Completely certain	Completely certain	Completely certain	No	No	No	No	Yes	No	No
hpt273	60	F	Married	Yes	Secondary/Vocational	Farmer	6	Diabetes	NHIS	Anti Dibetic and Hypertensive medication	6	Uncertain	Disagree	Agree	Disagree	Agree	Agree	Agree	Strongly agree	Strongly agree	Agree	Agree	Strongly agree	Strongly agree	Uncertain	Agree	Disagree	Agree	Agree	Agree	Strongly agree	Uncertain	Occationally	Frequently	Sometimes	Never	A good chance	A good chance	Average Chance	Average Chance	A good chance	Completely certain	Yes	No	Yes	Yes	Yes	No	Yes
hpt274	74	F	Married	Yes	Basic	Farmer	4	Heart Failure	None	Anti Hypertensive Medication	4	Uncertain	Disagree	Agree	Disagree	Agree	Agree	Agree	Strongly agree	Strongly agree	Agree	Agree	Strongly agree	Strongly agree	Uncertain	Agree	Disagree	Agree	Agree	Agree	Strongly agree	Uncertain	Occationally	Frequently	Sometimes	Never	A good chance	A good chance	Average Chance	Average Chance	A good chance	Completely certain	Yes	No	Yes	Yes	Yes	No	Yes
hpt275	45	F	Married	Yes	Basic	Private work	4	None	NHIS	Anti Hypertensive Medication	4	Disagree	Agree	Strongly agree	Strongly agree	Agree	Strongly agree	Strongly agree	Strongly agree	Strongly agree	Strongly agree	Agree	Strongly agree	Strongly agree	Agree	Agree	Agree	Agree	Strongly agree	Agree	Agree	Agree	Occationally	Sometimes	Occationally	Frequently	Average Chance	No chance at all	A slight chance	A slight chance	A slight chance	A slight chance	Yes	No	No	No	Yes	Yes	No
hpt276	45	M	Married	Yes	Non-formal	Private work	3	None	None	Anti Dibetic and Hypertensive medication	3	Strongly agree	Agree	Uncertain	Uncertain	Strongly Disagree	Strongly agree	Agree	Uncertain	Disagree	Strongly Disagree	Strongly agree	22	Uncertain	Disagree	Strongly Disagree	Strongly agree	Agree	Uncertain	Disagree	Strongly Disagree	Strongly agree	Rarely	Occationally	Sometimes	Frequently	No chance at all	A slight chance	Average Chance	A good chance	Averae Chance	No chance at all	No	Yes	No	Yes	Yes	Yes	Yes
hpt277	39	F	Married	Yes	Secondary/Vocational	Private work	2	None	None	Anti Hypertensive Medication	2	Disagree	Agree	Strongly agree	Strongly agree	Agree	Strongly agree	Strongly agree	Strongly agree	Strongly agree	Strongly agree	Agree	Strongly agree	Strongly agree	Agree	Agree	Agree	Agree	Strongly agree	Agree	Agree	Agree	Occationally	Sometimes	Occationally	Frequently	Average Chance	No chance at all	A slight chance	A slight chance	A slight chance	A slight chance	Yes	No	No	No	Yes	Yes	No
hpt278	42	F	Single	Yes	Secondary/Vocational	Private work	4	Diabetes	None	Anti Hypertensive Medication	4	Strongly agree	Strongly agree	Agree	Uncertain	Disagree	Agree	Disagree	Disagree	Agree	Agree	Agree	Strongly agree	Strongly agree	Uncertain	Agree	Uncertain	Disagree	Disagree	Agree	Uncertain	Agree	Rarely	Occationally	Frequently	Never	A good chance	Average Chance	A good chance	Average Chance	Completely certain	Completely certain	No	No	No	No	Yes	No	Yes
hpt279	48	F	Married	Yes	Secondary/Vocational	Private work	4	Diabetes	NHIS	Anti Hypertensive Medication	4	Agree	Strongly agree	Uncertain	Agree	Strongly agree	Agree	Agree	Strongly agree	Strongly agree	Strongly agree	Agree	Strongly agree	Strongly agree	Agree	Uncertain	Disagree	Agree	Strongly agree	Agree	Agree	Agree	Never	Occationally	Sometimes	Rarely	A good chance	A good chance	A good chance	Average Chance	A good chance	Completely certain	Yes	No	No	Yes	Yes	No	Yes
hpt280	58	F	Married	Yes	Basic	Private work	4	Diabetes	NHIS	Anti Dibetic and Hypertensive medication	4	Strongly agree	Strongly agree	Agree	Uncertain	Disagree	Agree	Disagree	Agree	Agree	Agree	Agree	Strongly agree	Strongly agree	Uncertain	Agree	Uncertain	Disagree	Disagree	Agree	Uncertain	Agree	Rarely	Occationally	Frequently	Never	A good chance	Average Chance	A good chance	Average Chance	Completely certain	Completely certain	No	No	No	No	Yes	No	Yes
hpt281	53	F	Married	Yes	Basic	Farmer	7	None	NHIS	Anti Hypertensive Medication	7	Disagree	Agree	Agree	Disagree	Disagree	Agree	Agree	Uncertain	Strongly agree	Agree	Strongly agree	Agree	Agree	Agree	Strongly agree	Uncertain	Disagree	Disagree	Disagree	Uncertain	Uncertain	Frequently	Sometimes	Sometimes	Never	A good chance	A good chance	A good chance	A good chance	A good chance	Completely certain	No	No	No	No	Yes	No	Yes
hpt282	60	F	Seperated/Widowed	Yes	Basic	Private work	3	None	None	Anti Hypertensive Medication	3	Strongly Disagree	Strongly Disagree	Disagree	Uncertain	Uncertain	Uncertain	Strongly agree	Disagree	Disagree	Strongly agree	Strongly agree	Strongly agree	Strongly agree	Strongly agree	Strongly agree	Strongly agree	Strongly agree	Disagree	Strongly Disagree	Disagree	Strongly Disagree	Occationally	Occationally	Occationally	Never	A good chance	Completely certain	Average Chance	A good chance	Completely certain	Completely certain	Yes	Yes	No	No	Yes	No	No
hpt283	40	F	Married	Yes	Basic	Farmer	1	None	NHIS	Anti Hypertensive Medication	1	Strongly agree	Agree	Agree	Agree	Strongly agree	Agree	Agree	Strongly agree	Agree	Strongly agree	Agree	Strongly agree	Agree	Agree	Agree	Agree	Strongly Disagree	Disagree	Disagree	Uncertain	Uncertain	Rarely	Frequently	Frequently	Never	A good chance	Completely certain	A good chance	Completely certain	A good chance	Completely certain	No	No	No	No	Yes	Yes	No
hpt284	60	F	Married	Yes	Basic	Private work	6	Diabetes	NHIS	Anti Hypertensive Medication	6	Agree	Agree	Strongly agree	Agree	Strongly agree	Agree	Agree	Strongly agree	Agree	Strongly agree	Strongly agree	Agree	Agree	Agree	Strongly agree	Uncertain	Strongly Disagree	Disagree	Disagree	Strongly Disagree	Strongly Disagree	Occationally	Sometimes	Rarely	Never	Average Chance	A good chance	Completely certain	A good chance	Completely certain	Completely certain	Yes	Yes	No	No	Yes	Yes	Yes
hpt285	32	F	Married	Yes	Secondary/Vocational	Government work	3	None	NHIS	Anti Hypertensive Medication	2.5	Strongly agree	Agree	Agree	Agree	Strongly agree	Agree	Agree	Strongly agree	Agree	Strongly agree	Agree	Strongly agree	Agree	Agree	Agree	Agree	Strongly Disagree	Disagree	Disagree	Uncertain	Uncertain	Rarely	Frequently	Frequently	Never	A good chance	A good chance	A good chance	Completely certain	A good chance	Completely certain	No	No	No	No	Yes	Yes	No
hpt286	55	F	Single	Yes	Secondary/Vocational	Private work	8	Diabetes	NHIS	Anti Hypertensive Medication	8	Disagree	Disagree	Strongly agree	Strongly agree	Strongly agree	Agree	Agree	Strongly agree	Agree	Strongly agree	Strongly agree	Strongly agree	Strongly agree	Agree	Agree	Agree	Strongly Disagree	Disagree	Disagree	Uncertain	Uncertain	Rarely	Never	Never	Never	Average Chance	Average Chance	Average Chance	Average Chance	Averae Chance	Average Chance	No	No	No	No	No	No	No
hpt287	51	F	Married	Yes	Tertiary	Government work	8	None	NHIS	Anti Hypertensive Medication	8	Disagree	Agree	Disagree	Strongly Disagree	Strongly Disagree	Disagree	Agree	Strongly agree	Agree	Strongly agree	Agree	Strongly agree	Agree	Strongly agree	Agree	Uncertain	Agree	Disagree	Disagree	Disagree	Strongly Disagree	Frequently	Sometimes	Sometimes	Sometimes	Completely certain	A good chance	Completely certain	A good chance	Completely certain	A good chance	No	No	Yes	No	Yes	Yes	No
hpt288	48	F	Married	Yes	Tertiary	Private work	7	None	NHIS	Anti Hypertensive Medication	7	Agree	Strongly agree	Agree	Agree	Uncertain	Uncertain	Strongly agree	Agree	Strongly agree	Agree	Strongly agree	Agree	Strongly agree	Disagree	Disagree	Disagree	Agree	Disagree	Agree	Agree	Uncertain	Occationally	Sometimes	Frequently	Frequently	A good chance	Average Chance	A good chance	A good chance	A good chance	Average Chance	No	No	No	No	Yes	No	No
hpt289	44	F	Married	Yes	Secondary/Vocational	Government work	4	None	NHIS	Anti Hypertensive Medication	4	Disagree	Agree	Disagree	Strongly Disagree	Strongly Disagree	Disagree	Agree	Strongly agree	Agree	Strongly agree	Agree	Strongly agree	Agree	Strongly agree	Agree	Uncertain	Agree	Disagree	Disagree	Disagree	Strongly Disagree	Frequently	Sometimes	Sometimes	Sometimes	Completely certain	A good chance	Completely certain	A good chance	Completely certain	A good chance	No	No	Yes	No	Yes	Yes	No
hpt290	56	F	Married	Yes	Basic	Private work	5	Diabetes	NHIS	Anti Dibetic and Hypertensive medication	5	Disagree	Agree	Disagree	Strongly Disagree	Strongly Disagree	Disagree	Agree	Strongly agree	Agree	Strongly agree	Agree	Strongly agree	Agree	Strongly agree	Agree	Uncertain	Agree	Disagree	Disagree	Disagree	Strongly Disagree	Frequently	Sometimes	Sometimes	Sometimes	Completely certain	A good chance	Completely certain	A good chance	Completely certain	A good chance	No	No	Yes	No	Yes	Yes	No
hpt291	38	F	Married	Yes	Basic	Farmer	3	None	NHIS	Anti Hypertensive Medication	4	Disagree	Agree	Disagree	Strongly Disagree	Strongly Disagree	Disagree	Agree	Strongly agree	Agree	Strongly agree	Agree	Strongly agree	Agree	Strongly agree	Agree	Uncertain	Agree	Disagree	Disagree	Disagree	Strongly Disagree	Frequently	Sometimes	Sometimes	Sometimes	Completely certain	A good chance	Completely certain	A good chance	Completely certain	A good chance	No	No	Yes	No	Yes	Yes	No
hpt292	73	F	Seperated/Widowed	Yes	Non-formal	Farmer	12	Diabetes	NHIS	Anti Hypertensive Medication	12	Disagree	Agree	Disagree	Strongly Disagree	Strongly Disagree	Disagree	Agree	Strongly agree	Agree	Strongly agree	Agree	Strongly agree	Agree	Strongly agree	Agree	Uncertain	Agree	Disagree	Disagree	Disagree	Strongly Disagree	Frequently	Sometimes	Sometimes	Sometimes	Completely certain	A good chance	Completely certain	A good chance	Completely certain	A good chance	No	No	Yes	No	Yes	Yes	No
hpt293	68	F	Single	Yes	Secondary/Vocational	Government work	15	None	NHIS	Anti Hypertensive Medication	15	Agree	Strongly agree	Agree	Uncertain	Agree	Agree	Strongly agree	Strongly agree	Agree	Strongly agree	Agree	Strongly agree	Agree	Strongly agree	Agree	Uncertain	Strongly agree	Disagree	Disagree	Strongly Disagree	Disagree	Rarely	Occationally	Sometimes	Rarely	Average Chance	A good chance	Completely certain	A good chance	Completely certain	Completely certain	No	No	No	No	Yes	Yes	No
hpt294	52	F	Married	Yes	Tertiary	Government work	4	None	Private	Anti Hypertensive Medication	4	Disagree	Agree	Disagree	Strongly Disagree	Strongly Disagree	Disagree	Agree	Strongly agree	Agree	Strongly agree	Agree	Strongly agree	Agree	Strongly agree	Agree	Uncertain	Agree	Disagree	Disagree	Disagree	Strongly Disagree	Frequently	Sometimes	Sometimes	Sometimes	Completely certain	A good chance	Completely certain	A good chance	Completely certain	A good chance	No	No	Yes	No	Yes	Yes	No
hpt295	52	F	Married	Yes	Tertiary	Farmer	7	Diabetes	NHIS	Anti Dibetic and Hypertensive medication	7	Disagree	Agree	Disagree	Strongly Disagree	Strongly Disagree	Disagree	Agree	Strongly agree	Agree	Strongly agree	Agree	Strongly agree	Agree	Strongly agree	Agree	Uncertain	Agree	Disagree	Disagree	Disagree	Strongly Disagree	Frequently	Sometimes	Sometimes	Sometimes	Completely certain	A good chance	Completely certain	A good chance	Completely certain	A good chance	No	No	Yes	No	Yes	Yes	No
hpt296	61	F	Married	Yes	Tertiary	Government work	5	Diabetes	NHIS	Anti Hypertensive Medication	5	Agree	Uncertain	Agree	Agree	Uncertain	Agree	Uncertain	Agree	Uncertain	Agree	Uncertain	Disagree	Uncertain	Agree	Uncertain	Agree	Uncertain	Agree	Uncertain	Uncertain	Disagree	Occationally	Sometimes	Occationally	Rarely	A slight chance	Average Chance	A good chance	Average Chance	A slight chance	A slight chance	No	No	Yes	Yes	No	Yes	No
hpt297	40	F	Married	Yes	Basic	Private work	10	Diabetes	NHIS	Anti Dibetic and Hypertensive medication	10	Strongly agree	Agree	Strongly agree	Uncertain	Strongly Disagree	Strongly agree	Uncertain	Agree	Strongly agree	Agree	Strongly agree	Uncertain	Strongly agree	Agree	Strongly agree	Agree	Strongly agree	Agree	Disagree	Uncertain	Agree	Frequently	Occationally	Rarely	Rarely	A slight chance	Average Chance	Average Chance	A good chance	Averae Chance	A good chance	No	No	Yes	Yes	No	No	Yes
hpt298	72	F	Married	Yes	Tertiary	Government work	15	Diabetes	NHIS	Anti Dibetic and Hypertensive medication	15	Agree	Strongly agree	Agree	Uncertain	Agree	Uncertain	Agree	Uncertain	Agree	Agree	Uncertain	Agree	Strongly agree	Agree	Agree	Strongly agree	Agree	Uncertain	Uncertain	Disagree	Strongly Disagree	Occationally	Sometimes	Occationally	Sometimes	A slight chance	Average Chance	A good chance	Average Chance	A good chance	Average Chance	No	No	Yes	No	No	No	No
hpt299	64	F	Seperated/Widowed	No	Non-formal	Farmer	5	Diabetes	NHIS	Anti Dibetic and Hypertensive medication	5	Agree	Strongly agree	Agree	Strongly agree	Agree	Uncertain	Agree	Strongly agree	Agree	Agree	Agree	Uncertain	Agree	Uncertain	Agree	Uncertain	Agree	Uncertain	Disagree	Uncertain	Disagree	Rarely	Occationally	Sometimes	Occationally	A slight chance	Average Chance	A slight chance	A good chance	A slight chance	Average Chance	No	No	Yes	Yes	No	No	No
hpt300	72	F	Married	Yes	Basic	Farmer	16	Diabetes	NHIS	Anti Hypertensive Medication	16	Agree	Strongly agree	Agree	Strongly agree	Agree	Agree	Strongly agree	Strongly agree	Agree	Strongly agree	Agree	Strongly agree	Agree	Strongly agree	Agree	Uncertain	Strongly agree	Disagree	Disagree	Disagree	Strongly Disagree	Sometimes	Frequently	Occationally	Rarely	Average Chance	A good chance	Completely certain	A good chance	Completely certain	Completely certain	No	No	No	No	Yes	Yes	No
hpt301	48	F	Married	Yes	Tertiary	Government work	2	Diabetes	NHIS	Anti Dibetic and Hypertensive medication	2	Agree	Uncertain	Agree	Agree	Strongly agree	Agree	Strongly agree	Uncertain	Strongly agree	Strongly agree	Agree	Strongly agree	Uncertain	Strongly agree	Agree	Strongly agree	Strongly agree	Agree	Uncertain	Disagree	Uncertain	Rarely	Occationally	Sometimes	Occationally	No chance at all	A slight chance	Average Chance	A slight chance	A good chance	Average Chance	No	No	Yes	No	No	Yes	No
hpt302	63	F	Married	Yes	Tertiary	Private work	12	Diabetes	NHIS	Anti Dibetic and Hypertensive medication	12	Agree	Strongly agree	Agree	Uncertain	Agree	Agree	Strongly agree	Strongly agree	Agree	Strongly agree	Agree	Strongly agree	Agree	Strongly agree	Agree	Uncertain	Strongly agree	Disagree	Disagree	Disagree	Strongly Disagree	Sometimes	Frequently	Occationally	Rarely	Average Chance	A good chance	Completely certain	A good chance	Completely certain	Completely certain	No	No	No	No	Yes	Yes	No
hpt303	41	M	Married	Yes	Secondary/Vocational	Private work	2	None	Private	Anti Hypertensive Medication	2	Agree	Strongly agree	Agree	Uncertain	Agree	Agree	Strongly agree	Strongly agree	Agree	Strongly agree	Agree	Strongly agree	Agree	Strongly agree	Agree	Uncertain	Strongly agree	Disagree	Disagree	Disagree	Strongly Disagree	Sometimes	Frequently	Occationally	Occationally	Average Chance	A good chance	Completely certain	A good chance	Completely certain	Completely certain	No	No	No	No	Yes	Yes	No
hpt304	63	F	Married	Yes	Secondary/Vocational	Farmer	9	None	NHIS	Anti Hypertensive Medication	9	Agree	Strongly agree	Agree	Uncertain	Agree	Agree	Strongly agree	Strongly agree	Agree	Strongly agree	Agree	Strongly agree	Agree	Strongly agree	Agree	Uncertain	Strongly agree	Disagree	Disagree	Disagree	Strongly Disagree	Sometimes	Frequently	Occationally	Occationally	Average Chance	A good chance	Completely certain	A good chance	Completely certain	Completely certain	No	No	No	No	Yes	Yes	No
hpt305	44	F	Married	Yes	Tertiary	Private work	4	None	NHIS	Anti Hypertensive Medication	4	Disagree	Strongly Disagree	Disagree	Agree	Disagree	Disagree	Agree	Agree	Strongly agree	Strongly agree	Agree	Agree	Strongly agree	Agree	Strongly agree	Uncertain	Disagree	Disagree	Disagree	Strongly Disagree	Disagree	Sometimes	Occationally	Frequently	Frequently	Average Chance	Average Chance	A good chance	A good chance	Completely certain	Completely certain	No	No	No	No	Yes	Yes	No
hpt306	78	F	Married	Yes	Basic	Private work	13	Diabetes	NHIS	Anti Hypertensive Medication	13	Agree	Strongly agree	Agree	Strongly agree	Agree	Agree	Strongly agree	Strongly agree	Agree	Strongly agree	Agree	Strongly agree	Agree	Strongly agree	Agree	Uncertain	Strongly agree	Disagree	Disagree	Disagree	Strongly Disagree	Sometimes	Frequently	Occationally	Occationally	Average Chance	A good chance	Completely certain	A good chance	Completely certain	Completely certain	No	No	No	No	Yes	Yes	No
hpt307	54	F	Married	Yes	Basic	Farmer	6	None	NHIS	Anti Hypertensive Medication	6	Agree	Strongly agree	Agree	Uncertain	Agree	Agree	Strongly agree	Strongly agree	Agree	Strongly agree	Agree	Strongly agree	Agree	Strongly agree	Agree	Uncertain	Strongly agree	Disagree	Disagree	Disagree	Strongly Disagree	Sometimes	Frequently	Occationally	Occationally	Average Chance	A good chance	Completely certain	A good chance	Completely certain	Completely certain	No	No	No	No	Yes	Yes	No
hpt308	57	F	Married	Yes	Tertiary	Private work	5	None	NHIS	Anti Hypertensive Medication	5	Disagree	Agree	Disagree	Strongly Disagree	Strongly Disagree	Disagree	Agree	Strongly agree	Agree	Strongly agree	Agree	Strongly agree	Agree	Strongly agree	Agree	Uncertain	Agree	Disagree	Disagree	Disagree	Strongly Disagree	Frequently	Sometimes	Sometimes	Sometimes	Completely certain	A good chance	Completely certain	A good chance	Completely certain	A good chance	No	No	No	No	Yes	Yes	No
hpt309	57	F	Married	Yes	Tertiary	Government work	5	None	Private	Anti Hypertensive Medication	5	Disagree	Agree	Disagree	Strongly Disagree	Strongly Disagree	Disagree	Agree	Strongly agree	Agree	Strongly agree	Agree	Strongly agree	Agree	Strongly agree	Agree	Uncertain	Agree	Disagree	Disagree	Disagree	Strongly Disagree	Frequently	Sometimes	Sometimes	Sometimes	Completely certain	A good chance	Completely certain	A good chance	Completely certain	A good chance	No	No	No	No	Yes	Yes	No
hpt310	69	F	Married	Yes	Basic	Government work	7	None	NHIS	Anti Hypertensive Medication	7	Agree	Strongly agree	Agree	Uncertain	Agree	Agree	Strongly agree	Strongly agree	Agree	Strongly agree	Agree	Strongly agree	Agree	Strongly agree	Agree	Uncertain	Strongly agree	Disagree	Disagree	Disagree	Strongly Disagree	Sometimes	Frequently	Occationally	Occationally	Average Chance	A good chance	Completely certain	A good chance	Completely certain	Completely certain	No	No	No	No	Yes	Yes	No
hpt311	60	F	Single	Yes	Secondary/Vocational	Private work	6	Heart Failure	NHIS	Anti Dibetic and Hypertensive medication	6	Strongly agree	Strongly agree	Agree	Uncertain	Disagree	Agree	Disagree	Agree	Strongly agree	Agree	Agree	Strongly agree	Strongly agree	Uncertain	Agree	Uncertain	Disagree	Disagree	Agree	Uncertain	Agree	Rarely	Occationally	Frequently	Never	A good chance	Average Chance	A good chance	Average Chance	Completely certain	Completely certain	No	No	No	No	Yes	No	Yes
hpt312	49	F	Married	Yes	Secondary/Vocational	Private work	4	Heart Failure	NHIS	Anti Dibetic and Hypertensive medication	4	Strongly agree	Strongly agree	Agree	Uncertain	Disagree	Agree	Disagree	Agree	Strongly agree	Agree	Agree	Strongly agree	Strongly agree	Uncertain	Agree	Uncertain	Disagree	Disagree	Agree	Uncertain	Agree	Rarely	Occationally	Frequently	Never	A good chance	Average Chance	A good chance	Average Chance	Completely certain	Completely certain	No	No	No	No	Yes	No	Yes
hpt313	60	F	Single	No	Basic	Private work	3	None	None	Anti Hypertensive Medication	3	Strongly agree	Strongly agree	Agree	Uncertain	Disagree	Agree	Disagree	Agree	Strongly agree	Agree	Agree	Strongly agree	Strongly agree	Uncertain	Agree	Uncertain	Disagree	Disagree	Agree	Uncertain	Agree	Rarely	Occationally	Frequently	Never	A good chance	Average Chance	A good chance	Average Chance	Completely certain	Completely certain	No	No	No	No	Yes	No	Yes
hpt314	62	F	Married	Yes	Tertiary	Government work	4	None	NHIS	Anti Dibetic and Hypertensive medication	4	Strongly agree	Agree	Uncertain	Disagree	Agree	Agree	Agree	Strongly agree	Strongly agree	Agree	Strongly agree	Strongly agree	Strongly agree	Agree	Disagree	Agree	Agree	Strongly agree	Strongly agree	Disagree	Strongly agree	Frequently	Sometimes	Frequently	Frequently	Average Chance	A good chance	Completely certain	Completely certain	Completely certain	Completely certain	No	No	No	No	Yes	No	No
hpt315	40	F	Married	Yes	Tertiary	Student	4	None	NHIS	Anti Hypertensive Medication	4	Strongly agree	Agree	Uncertain	Disagree	Agree	Agree	Agree	Strongly agree	Strongly agree	Agree	Strongly agree	Strongly agree	Strongly agree	Agree	Disagree	Agree	Agree	Strongly agree	Strongly agree	Disagree	Strongly agree	Frequently	Sometimes	Frequently	Frequently	Average Chance	A good chance	Completely certain	Completely certain	Completely certain	Completely certain	No	No	No	No	Yes	No	No
hpt316	29	F	Married	Yes	Secondary/Vocational	Student	2	None	NHIS	Anti Hypertensive Medication	2	Disagree	Agree	Strongly Disagree	Agree	Agree	Strongly agree	Agree	Strongly agree	Agree	Agree	Strongly agree	Agree	Strongly agree	Agree	Strongly agree	Uncertain	Strongly agree	Disagree	Strongly Disagree	Disagree	Strongly Disagree	Frequently	Frequently	Sometimes	Frequently	Completely certain	A good chance	A good chance	Completely certain	Completely certain	Completely certain	No	No	No	No	Yes	Yes	No
hpt317	78	F	Seperated/Widowed	Yes	Non-formal	Unemployed	12	Diabetes	NHIS	Anti Dibetic and Hypertensive medication	12	Disagree	Disagree	Uncertain	Disagree	Agree	Agree	Disagree	Strongly agree	Agree	Strongly agree	Agree	Strongly agree	Agree	Agree	Strongly agree	Uncertain	Disagree	Disagree	Strongly Disagree	Uncertain	Uncertain	Frequently	Sometimes	Occationally	Never	A good chance	Completely certain	Average Chance	A good chance	No chance at all	Completely certain	No	No	No	No	Yes	Yes	No
hpt318	44	F	Single	Yes	Tertiary	Government work	6	Diabetes	Private	Anti Hypertensive Medication	6	Disagree	Agree	Disagree	Strongly Disagree	Strongly Disagree	Disagree	Agree	Strongly agree	Agree	Strongly agree	Agree	Strongly agree	Agree	Strongly agree	Agree	Uncertain	Agree	Disagree	Disagree	Disagree	Strongly Disagree	Frequently	Sometimes	Sometimes	Sometimes	Completely certain	A good chance	Completely certain	A good chance	Completely certain	A good chance	No	No	Yes	No	Yes	Yes	No
hpt319	65	F	Married	Yes	Basic	Private work	7	Diabetes	NHIS	Anti Dibetic and Hypertensive medication	7	Agree	Agree	Uncertain	Agree	Uncertain	Agree	Agree	Uncertain	Agree	Agree	Uncertain	Agree	Uncertain	Agree	Uncertain	Agree	Uncertain	Agree	Uncertain	Agree	Disagree	Rarely	Occationally	Sometimes	Occationally	A slight chance	Average Chance	A good chance	Average Chance	A good chance	Average Chance	No	No	Yes	Yes	Yes	No	Yes
hpt320	49	F	Married	Yes	Non-formal	Private work	3	Diabetes	NHIS	Anti Dibetic and Hypertensive medication	3	Strongly agree	Agree	Strongly agree	Agree	Strongly agree	Agree	Strongly agree	Agree	Strongly agree	Agree	Agree	Uncertain	Agree	Uncertain	Agree	Strongly agree	Agree	Agree	Strongly Disagree	Uncertain	Disagree	Occationally	Rarely	Sometimes	Occationally	A slight chance	Average Chance	A good chance	Average Chance	Averae Chance	A good chance	No	No	No	No	No	No	No
hpt321	54	F	Married	Yes	Non-formal	Farmer	6	None	NHIS	Anti Hypertensive Medication	6	Agree	Strongly agree	Agree	Agree	Strongly agree	Agree	Agree	Strongly agree	Strongly agree	Strongly agree	Strongly agree	Agree	Strongly agree	Strongly agree	Agree	Uncertain	Agree	Disagree	Disagree	Agree	Uncertain	Frequently	Sometimes	Occationally	Never	A good chance	Completely certain	A good chance	Completely certain	Averae Chance	Completely certain	No	No	Yes	No	Yes	No	Yes
hpt322	61	F	Married	No	Non-formal	Private work	5	None	NHIS	Anti Hypertensive Medication	5	Strongly agree	Strongly agree	Strongly agree	Agree	Strongly agree	Agree	Strongly agree	Strongly agree	Strongly agree	Strongly agree	Strongly agree	Strongly agree	Strongly agree	Agree	Strongly agree	Uncertain	Strongly Disagree	Disagree	Strongly Disagree	Strongly Disagree	Strongly Disagree	Frequently	Never	Occationally	Never	Average Chance	A good chance	Completely certain	A good chance	Completely certain	Completely certain	Yes	Yes	No	No	Yes	Yes	No
hpt323	54	F	Married	No	Secondary/Vocational	Private work	10	Diabetes	NHIS	Anti Hypertensive Medication	10	Disagree	Agree	Agree	Disagree	Strongly agree	Agree	Agree	Uncertain	Strongly agree	Strongly agree	Strongly agree	Strongly agree	Strongly agree	Agree	Strongly agree	Agree	Strongly Disagree	Disagree	Disagree	Uncertain	Uncertain	Rarely	Never	Sometimes	Never	A good chance	A good chance	A good chance	A good chance	A good chance	Completely certain	No	No	No	No	Yes	Yes	No
hpt324	70	F	Seperated/Widowed	Yes	Non-formal	Farmer	8	Diabetes	NHIS	Anti Dibetic and Hypertensive medication	8	Disagree	Strongly Disagree	Strongly Disagree	Agree	Strongly agree	Agree	Strongly agree	Agree	Strongly agree	Strongly agree	Agree	Strongly agree	Agree	Strongly agree	Agree	Agree	Disagree	Disagree	Strongly Disagree	Disagree	Uncertain	Sometimes	Frequently	Sometimes	Frequently	A good chance	Completely certain	A good chance	Completely certain	A good chance	Completely certain	No	No	No	Yes	Yes	Yes	No
hpt325	44	F	Married	Yes	Basic	Farmer	2	None	NHIS	Anti Hypertensive Medication	2	Strongly agree	Agree	Agree	Agree	Strongly agree	Agree	Agree	Strongly agree	Agree	Strongly agree	Agree	Strongly agree	Agree	Agree	Agree	Agree	Uncertain	Disagree	Strongly Disagree	Disagree	Strongly Disagree	Sometimes	Occationally	Sometimes	Never	A good chance	Completely certain	Completely certain	A good chance	Completely certain	Completely certain	Yes	Yes	Yes	Yes	No	No	Yes
hpt326	70	F	Seperated/Widowed	Yes	Non-formal	Private work	7	Diabetes	NHIS	Anti Dibetic and Hypertensive medication	7	Disagree	Strongly Disagree	Strongly Disagree	Agree	Strongly agree	Agree	Strongly agree	Agree	Strongly agree	Agree	Agree	Strongly agree	Agree	Strongly agree	Agree	Strongly agree	Agree	Disagree	Strongly Disagree	Disagree	Uncertain	Occationally	Never	Sometimes	Frequently	Average Chance	A good chance	Completely certain	A good chance	Completely certain	Completely certain	No	No	No	No	No	Yes	No
hpt327	51	F	Seperated/Widowed	Yes	Basic	Private work	5	None	NHIS	Anti Hypertensive Medication	5	Disagree	Disagree	Strongly Disagree	Strongly agree	Agree	Strongly agree	Strongly agree	Agree	Strongly agree	Strongly agree	Agree	Strongly agree	Agree	Strongly agree	Agree	Uncertain	Disagree	Disagree	Strongly Disagree	Disagree	Uncertain	Occationally	Sometimes	Occationally	Frequently	A good chance	Completely certain	A good chance	Completely certain	A good chance	Completely certain	No	Yes	No	No	Yes	Yes	No
hpt328	70	F	Seperated/Widowed	Yes	Basic	Private work	7	Diabetes	NHIS	Anti Hypertensive Medication	7	Agree	Agree	Agree	Agree	Strongly agree	Strongly agree	Strongly agree	Agree	Strongly agree	Strongly agree	Strongly agree	Strongly agree	Strongly agree	Strongly agree	Strongly agree	Agree	Agree	Agree	Strongly Disagree	Uncertain	Agree	Occationally	Sometimes	Sometimes	Frequently	A good chance	Average Chance	A good chance	A good chance	Completely certain	Completely certain	No	No	No	No	Yes	Yes	No
hpt329	72	F	Seperated/Widowed	Yes	Non-formal	Unemployed	6	None	NHIS	Anti Hypertensive Medication	6	Disagree	Agree	Agree	Strongly agree	Agree	Agree	Agree	Strongly agree	Agree	Strongly agree	Agree	Agree	Strongly agree	Agree	Agree	Uncertain	Agree	Agree	Strongly Disagree	Agree	Strongly agree	Frequently	Sometimes	Frequently	Never	A good chance	Average Chance	Completely certain	Completely certain	Completely certain	Completely certain	No	No	No	No	Yes	Yes	No
hpt330	33	F	Married	Yes	Basic	Farmer	1	Diabetes	NHIS	Anti Hypertensive Medication	1	Strongly agree	Uncertain	Agree	Agree	Agree	Agree	Strongly agree	Strongly agree	Strongly agree	Strongly agree	Strongly agree	Agree	Agree	Strongly agree	Agree	Agree	Agree	Strongly Disagree	Strongly Disagree	Uncertain	Uncertain	Occationally	Occationally	Sometimes	Never	Completely certain	A good chance	A good chance	Completely certain	Completely certain	Completely certain	No	No	No	No	Yes	No	No
hpt331	65	F	Single	Yes	Basic	Private work	9	Diabetes	NHIS	Anti Dibetic and Hypertensive medication	9	Strongly agree	Disagree	Agree	Disagree	Agree	Uncertain	Agree	Strongly agree	Agree	Strongly agree	Agree	Agree	Uncertain	Agree	Uncertain	Agree	Agree	Strongly agree	Strongly agree	Strongly Disagree	Agree	Sometimes	Sometimes	Sometimes	Frequently	Completely certain	A slight chance	A good chance	A good chance	A good chance	Completely certain	No	Yes	Yes	No	Yes	No	Yes
hpt332	51	F	Married	Yes	Basic	Government work	7	Diabetes	NHIS	Anti Dibetic and Hypertensive medication	7	Disagree	Strongly Disagree	Agree	Disagree	Agree	Agree	Disagree	Strongly agree	Strongly agree	Agree	Strongly agree	Strongly agree	Strongly agree	Agree	Disagree	Agree	Disagree	Uncertain	Agree	Disagree	Strongly agree	Frequently	Never	Sometimes	Frequently	Average Chance	A good chance	Average Chance	A good chance	Completely certain	A good chance	Yes	No	Yes	No	No	Yes	Yes
hpt333	48	F	Married	Yes	Secondary/Vocational	Private work	9	None	NHIS	Anti Hypertensive Medication	9	Disagree	Strongly agree	Uncertain	Agree	Agree	Strongly agree	Agree	Strongly agree	Strongly agree	Strongly agree	Agree	Strongly agree	Agree	Uncertain	Uncertain	Agree	Agree	Agree	Agree	Uncertain	Agree	Occationally	Sometimes	Never	Never	Average Chance	A slight chance	A good chance	A good chance	A good chance	Completely certain	Yes	No	No	Yes	Yes	No	Yes
hpt334	48	F	Married	Yes	Secondary/Vocational	Private work	7	Heart Failure	NHIS	Anti Hypertensive Medication	7	Disagree	Agree	Uncertain	Agree	Agree	Strongly agree	Agree	Strongly agree	Strongly agree	Strongly agree	Agree	Strongly agree	Agree	Uncertain	Uncertain	Agree	Agree	Agree	Agree	Uncertain	Agree	Occationally	Sometimes	Never	Never	Average Chance	A slight chance	A good chance	A good chance	A good chance	Completely certain	Yes	No	No	Yes	Yes	No	Yes
hpt335	48	F	Married	Yes	Non-formal	Private work	15	Diabetes	NHIS	Anti Dibetic and Hypertensive medication	15	Disagree	Agree	Uncertain	Agree	Agree	Strongly agree	Agree	Strongly agree	Strongly agree	Strongly agree	Agree	Strongly agree	Agree	Uncertain	Uncertain	Agree	Agree	Agree	Agree	Uncertain	Agree	Occationally	Sometimes	Never	Never	Average Chance	A slight chance	A good chance	A good chance	A good chance	Completely certain	Yes	No	No	Yes	Yes	No	Yes
hpt336	64	F	Seperated/Widowed	Yes	Basic	Private work	8	Diabetes	NHIS	Anti Dibetic and Hypertensive medication	8	Strongly agree	Disagree	Uncertain	Agree	Strongly agree	Agree	Disagree	Strongly agree	Strongly agree	Agree	Strongly agree	Agree	Agree	Uncertain	Disagree	Agree	Uncertain	Disagree	Uncertain	Disagree	Agree	Never	Occationally	Sometimes	Occationally	Average Chance	A good chance	A good chance	Average Chance	A good chance	Average Chance	Yes	No	No	Yes	Yes	No	Yes
hpt337	56	F	Married	Yes	Secondary/Vocational	Unemployed	15	Diabetes	NHIS	Anti Hypertensive Medication	15	Strongly agree	Disagree	Agree	Disagree	Agree	Uncertain	Agree	Strongly agree	Agree	Strongly agree	Agree	Agree	Uncertain	Agree	Uncertain	Agree	Agree	Strongly agree	Strongly agree	Strongly Disagree	Agree	Occationally	Sometimes	Sometimes	Frequently	Completely certain	A slight chance	A good chance	A good chance	A good chance	Completely certain	No	Yes	Yes	No	Yes	No	Yes
hpt338	70	F	Married	Yes	Basic	Government work	6	Diabetes	NHIS	Anti Dibetic and Hypertensive medication	6	Strongly agree	Disagree	Agree	Disagree	Agree	Uncertain	Agree	Strongly agree	Agree	Strongly agree	Agree	Agree	Uncertain	Agree	Uncertain	Agree	Agree	Strongly agree	Strongly agree	Strongly Disagree	Agree	Occationally	Sometimes	Sometimes	Frequently	Completely certain	A slight chance	A good chance	A good chance	A good chance	Completely certain	No	Yes	Yes	No	Yes	No	Yes
hpt339	59	F	Married	Yes	Tertiary	Private work	7	None	NHIS	Anti Hypertensive Medication	7	Strongly agree	Disagree	Agree	Disagree	Agree	Uncertain	Agree	Strongly agree	Agree	Strongly agree	Agree	Agree	Agree	Uncertain	Uncertain	Agree	Agree	Strongly agree	Strongly agree	Strongly Disagree	Agree	Frequently	Sometimes	Sometimes	Frequently	Completely certain	A slight chance	A good chance	A good chance	A good chance	Completely certain	No	Yes	Yes	No	Yes	No	Yes
hpt340	70	M	Married	Yes	Basic	Government work	2	None	NHIS	Anti Hypertensive Medication	2	Strongly Disagree	Strongly Disagree	Uncertain	Uncertain	Uncertain	Agree	Strongly agree	Disagree	Disagree	Strongly agree	Strongly agree	Strongly agree	Strongly agree	Strongly agree	Strongly agree	Strongly agree	Strongly agree	Disagree	Strongly Disagree	Disagree	Strongly Disagree	Occationally	Occationally	Occationally	Never	A good chance	Completely certain	Average Chance	A good chance	Completely certain	Completely certain	Yes	Yes	No	No	Yes	No	No
hpt341	46	F	Married	Yes	Secondary/Vocational	Government work	2	None	NHIS	Anti Hypertensive Medication	2	Agree	Agree	Agree	Uncertain	Disagree	Disagree	Disagree	Agree	Agree	Disagree	Disagree	Disagree	Disagree	Disagree	Disagree	Disagree	Disagree	Agree	Agree	Agree	Agree	Rarely	Never	Rarely	Never	No chance at all	No chance at all	No chance at all	A slight chance	No chance at all	A slight chance	Yes	Yes	Yes	Yes	Yes	Yes	Yes
hpt342	47	F	Married	Yes	Tertiary	Private work	2	None	NHIS	Anti Hypertensive Medication	2	Agree	Agree	Agree	Uncertain	Disagree	Disagree	Disagree	Agree	Agree	Disagree	Disagree	Disagree	Disagree	Disagree	Disagree	Disagree	Disagree	Agree	Agree	Agree	Agree	Rarely	Never	Rarely	Never	No chance at all	No chance at all	No chance at all	A slight chance	No chance at all	A slight chance	Yes	Yes	Yes	Yes	Yes	Yes	Yes
hpt343	43	F	Married	Yes	Basic	Government work	2	None	NHIS	Anti Hypertensive Medication	2	Agree	Agree	Agree	Uncertain	Disagree	Disagree	Disagree	Agree	Agree	Disagree	Disagree	Disagree	Disagree	Disagree	Disagree	Disagree	Disagree	Agree	Agree	Agree	Agree	Rarely	Never	Rarely	Never	No chance at all	No chance at all	No chance at all	A slight chance	No chance at all	A slight chance	Yes	Yes	Yes	Yes	Yes	Yes	Yes
hpt344	40	F	Single	No	Secondary/Vocational	Government work	2	None	NHIS	Anti Hypertensive Medication	2	Agree	Agree	Agree	Uncertain	Disagree	Disagree	Disagree	Agree	Agree	Disagree	Disagree	Disagree	Disagree	Disagree	Disagree	Disagree	Disagree	Agree	Agree	Agree	Agree	Rarely	Never	Rarely	Never	No chance at all	No chance at all	No chance at all	A slight chance	No chance at all	A slight chance	Yes	Yes	Yes	Yes	Yes	Yes	Yes
hpt345	55	F	Married	Yes	Basic	Government work	2	Diabetes	NHIS	Anti Hypertensive Medication	2	Agree	Agree	Agree	Uncertain	Disagree	Disagree	Disagree	Agree	Agree	Disagree	Disagree	Disagree	Disagree	Disagree	Disagree	Disagree	Disagree	Agree	Agree	Agree	Agree	Rarely	Never	Rarely	Never	No chance at all	No chance at all	No chance at all	A slight chance	No chance at all	A slight chance	Yes	Yes	Yes	Yes	Yes	Yes	Yes
hpt346	49	F	Married	Yes	Tertiary	Government work	4	None	NHIS	Anti Hypertensive Medication	4	Agree	Agree	Agree	Uncertain	Disagree	Disagree	Disagree	Agree	Agree	Disagree	Disagree	Disagree	Disagree	Disagree	Disagree	Disagree	Disagree	Agree	Agree	Agree	Agree	Rarely	Never	Rarely	Never	No chance at all	No chance at all	No chance at all	A slight chance	No chance at all	A slight chance	Yes	Yes	Yes	Yes	Yes	Yes	Yes
hpt347	44	F	Married	Yes	Tertiary	Government work	5	Diabetes	Private	Anti Dibetic and Hypertensive medication	5	Strongly agree	Agree	Agree	Agree	Strongly agree	Agree	Uncertain	Strongly agree	Strongly agree	Strongly agree	Strongly agree	Strongly agree	Strongly agree	Agree	Disagree	Uncertain	Agree	Disagree	Agree	Uncertain	Uncertain	Frequently	Sometimes	Occationally	Frequently	A good chance	A good chance	Average Chance	A good chance	A good chance	Average Chance	No	No	No	No	Yes	No	No
hpt348	49	F	Married	Yes	Tertiary	Government work	5	None	Private	Anti Hypertensive Medication	5	Strongly agree	Agree	Agree	Agree	Strongly agree	Agree	Uncertain	Strongly agree	Strongly agree	Strongly agree	Strongly agree	Strongly agree	Strongly agree	Agree	Disagree	Uncertain	Agree	Disagree	Agree	Uncertain	Uncertain	Frequently	Sometimes	Occationally	Frequently	A good chance	A good chance	Average Chance	A good chance	A good chance	Average Chance	No	No	No	No	Yes	No	No
hpt349	42	F	Married	Yes	Tertiary	Government work	6	None	NHIS	Anti Hypertensive Medication	6	Disagree	Strongly Disagree	Disagree	Agree	Disagree	Disagree	Agree	Agree	Strongly agree	Strongly agree	Agree	Agree	Strongly agree	Agree	Strongly agree	Uncertain	Disagree	Disagree	Disagree	Strongly Disagree	Disagree	Sometimes	Occationally	Frequently	Frequently	Average Chance	Completely certain	A good chance	A good chance	Completely certain	Completely certain	No	No	No	No	Yes	Yes	No
hpt350	49	F	Married	Yes	Basic	Government work	2	None	NHIS	Anti Hypertensive Medication	2	Disagree	Agree	Disagree	Strongly Disagree	Strongly Disagree	Disagree	Agree	Strongly agree	Agree	Strongly agree	Agree	Strongly agree	Agree	Strongly agree	Agree	Uncertain	Agree	Disagree	Disagree	Disagree	Strongly Disagree	Frequently	Sometimes	Sometimes	Sometimes	Completely certain	A good chance	Completely certain	A good chance	Completely certain	A good chance	No	No	Yes	No	Yes	Yes	No
hpt351	45	F	Married	Yes	Secondary/Vocational	Private work	2	None	NHIS	Anti Hypertensive Medication	2	Agree	Agree	Agree	Uncertain	Disagree	Disagree	Disagree	Agree	Agree	Disagree	Disagree	Disagree	Disagree	Disagree	Disagree	Disagree	Disagree	Agree	Agree	Agree	Agree	Rarely	Never	Rarely	Never	No chance at all	No chance at all	No chance at all	A slight chance	No chance at all	A slight chance	Yes	Yes	Yes	Yes	Yes	Yes	Yes
hpt352	49	F	Seperated/Widowed	No	Basic	Private work	2	None	NHIS	Anti Hypertensive Medication	2	Agree	Agree	Agree	Uncertain	Disagree	Disagree	Disagree	Agree	Agree	Disagree	Disagree	Disagree	Disagree	Disagree	Disagree	Disagree	Disagree	Agree	Agree	Agree	Agree	Rarely	Never	Rarely	Never	No chance at all	No chance at all	No chance at all	A slight chance	No chance at all	A slight chance	Yes	Yes	Yes	Yes	Yes	Yes	Yes
hpt353	45	F	Single	No	Basic	Government work	2	None	NHIS	Anti Hypertensive Medication	2	Agree	Agree	Agree	Uncertain	Disagree	Disagree	Disagree	Agree	Agree	Disagree	Disagree	Disagree	Disagree	Disagree	Disagree	Disagree	Disagree	Agree	Agree	Agree	Agree	Rarely	Never	Rarely	Never	No chance at all	No chance at all	No chance at all	A slight chance	No chance at all	A slight chance	Yes	Yes	Yes	Yes	Yes	Yes	Yes
hpt354	42	F	Married	Yes	Secondary/Vocational	Farmer	2	None	NHIS	Anti Hypertensive Medication	2	Agree	Agree	Agree	Uncertain	Disagree	Disagree	Disagree	Agree	Agree	Disagree	Disagree	Disagree	Disagree	Disagree	Disagree	Disagree	Disagree	Agree	Agree	Agree	Agree	Rarely	Never	Rarely	Never	No chance at all	No chance at all	No chance at all	A slight chance	No chance at all	A slight chance	Yes	Yes	Yes	Yes	Yes	Yes	Yes
hpt355	49	F	Seperated/Widowed	No	Non-formal	Government work	2	None	NHIS	Anti Hypertensive Medication	2	Agree	Agree	Agree	Uncertain	Disagree	Disagree	Disagree	Agree	Agree	Disagree	Disagree	Disagree	Disagree	Disagree	Disagree	Disagree	Disagree	Agree	Agree	Agree	Agree	Rarely	Never	Rarely	Never	No chance at all	No chance at all	No chance at all	A slight chance	No chance at all	A slight chance	Yes	Yes	Yes	Yes	Yes	Yes	Yes
hpt356	45	F	Married	Yes	Tertiary	Government work	2	None	NHIS	Anti Hypertensive Medication	2	Agree	Agree	Agree	Uncertain	Disagree	Disagree	Disagree	Agree	Agree	Disagree	Disagree	Disagree	Disagree	Disagree	Disagree	Disagree	Disagree	Agree	Agree	Agree	Agree	Rarely	Never	Rarely	Never	No chance at all	No chance at all	No chance at all	A slight chance	No chance at all	A slight chance	Yes	Yes	Yes	Yes	Yes	Yes	Yes
hpt357	49	F	Seperated/Widowed	No	Tertiary	Farmer	2	None	NHIS	Anti Hypertensive Medication	2	Agree	Agree	Agree	Uncertain	Disagree	Disagree	Disagree	Agree	Agree	Disagree	Disagree	Disagree	Disagree	Disagree	Disagree	Disagree	Disagree	Agree	Agree	Agree	Agree	Rarely	Never	Rarely	Never	No chance at all	No chance at all	No chance at all	A slight chance	No chance at all	A slight chance	Yes	Yes	Yes	Yes	Yes	Yes	Yes
hpt358	50	F	Married	Yes	Basic	Farmer	2	None	NHIS	Anti Hypertensive Medication	2	Agree	Agree	Agree	Uncertain	Disagree	Disagree	Disagree	Agree	Agree	Disagree	Disagree	Disagree	Disagree	Disagree	Disagree	Disagree	Disagree	Agree	Agree	Agree	Agree	Rarely	Never	Rarely	Never	No chance at all	No chance at all	No chance at all	A slight chance	No chance at all	A slight chance	Yes	Yes	Yes	Yes	Yes	Yes	Yes
hpt359	49	F	Married	Yes	Basic	Government work	2	None	NHIS	Anti Hypertensive Medication	2	Agree	Agree	Agree	Uncertain	Disagree	Disagree	Disagree	Agree	Agree	Disagree	Disagree	Disagree	Disagree	Disagree	Disagree	Disagree	Disagree	Agree	Agree	Agree	Agree	Rarely	Never	Rarely	Never	No chance at all	No chance at all	No chance at all	A slight chance	No chance at all	A slight chance	Yes	Yes	Yes	Yes	Yes	Yes	Yes
hpt360	45	F	Married	Yes	Basic	Private work	2	None	NHIS	Anti Hypertensive Medication	2	Agree	Agree	Agree	Uncertain	Disagree	Disagree	Disagree	Agree	Agree	Disagree	Disagree	Disagree	Disagree	Disagree	Disagree	Disagree	Disagree	Agree	Agree	Agree	Agree	Rarely	Never	Rarely	Never	No chance at all	No chance at all	No chance at all	A slight chance	No chance at all	A slight chance	Yes	Yes	Yes	Yes	Yes	Yes	Yes
hpt361	46	F	Married	Yes	Secondary/Vocational	Government work	8	Diabetes	NHIS	Anti Dibetic and Hypertensive medication	8	Disagree	Agree	Disagree	Strongly Disagree	Strongly Disagree	Disagree	Agree	Strongly agree	Agree	Strongly agree	Agree	Strongly agree	Agree	Strongly agree	Agree	Uncertain	Agree	Disagree	Disagree	Disagree	Strongly Disagree	Frequently	Sometimes	Sometimes	Sometimes	Completely certain	A good chance	Completely certain	A good chance	Completely certain	A good chance	No	No	Yes	No	Yes	Yes	No
hpt362	49	F	Married	Yes	Tertiary	Government work	3	Diabetes	NHIS	Anti Hypertensive Medication	3	Disagree	Agree	Disagree	Strongly Disagree	Strongly Disagree	Disagree	Agree	Strongly agree	Agree	Strongly agree	Agree	Strongly agree	Agree	Strongly agree	Agree	Uncertain	Agree	Disagree	Disagree	Disagree	Strongly Disagree	Frequently	Sometimes	Sometimes	Sometimes	Completely certain	A good chance	Completely certain	A good chance	Completely certain	A good chance	No	No	Yes	No	Yes	Yes	No
hpt363	54	F	Married	Yes	Secondary/Vocational	Private work	9	Diabetes	NHIS	Anti Dibetic and Hypertensive medication	9	Disagree	Agree	Disagree	Strongly Disagree	Strongly Disagree	Disagree	Agree	Strongly agree	Agree	Strongly agree	Agree	Strongly agree	Agree	Strongly agree	Agree	Uncertain	Agree	Disagree	Disagree	Disagree	Strongly Disagree	Frequently	Sometimes	Sometimes	Sometimes	Completely certain	A good chance	Completely certain	A good chance	Completely certain	A good chance	No	No	Yes	No	Yes	Yes	No
hpt364	54	F	Married	Yes	Secondary/Vocational	Government work	6	Diabetes	NHIS	Anti Hypertensive Medication	6	Disagree	Agree	Disagree	Strongly Disagree	Strongly Disagree	Disagree	Agree	Strongly agree	Agree	Strongly agree	Agree	Strongly agree	Agree	Strongly agree	Agree	Uncertain	Agree	Disagree	Disagree	Disagree	Strongly Disagree	Frequently	Sometimes	Sometimes	Sometimes	Completely certain	A good chance	Completely certain	A good chance	Completely certain	A good chance	No	No	Yes	No	Yes	Yes	No
hpt365	39	F	Married	Yes	Tertiary	Student	3	None	NHIS	Anti Hypertensive Medication	3	Disagree	Strongly Disagree	Disagree	Agree	Disagree	Disagree	Agree	Agree	Strongly agree	Strongly agree	Agree	Agree	Strongly agree	Agree	Strongly agree	Uncertain	Disagree	Disagree	Disagree	Strongly Disagree	Disagree	Sometimes	Occationally	Frequently	Frequently	Average Chance	Completely certain	A good chance	A good chance	Completely certain	Completely certain	No	No	No	No	Yes	Yes	No
hpt366	45	F	Married	Yes	Tertiary	Government work	4	None	Private	Anti Hypertensive Medication	4	Disagree	Agree	Disagree	Agree	Agree	Agree	Agree	Strongly agree	Disagree	Strongly agree	Agree	Strongly agree	Agree	Strongly agree	Agree	Uncertain	Agree	Strongly Disagree	Disagree	Disagree	Strongly Disagree	Frequently	Occationally	Sometimes	Frequently	Average Chance	Average Chance	Completely certain	A good chance	A good chance	Completely certain	No	No	No	Yes	Yes	Yes	No
hpt367	52	F	Married	Yes	Secondary/Vocational	Private work	6	None	Private	Anti Hypertensive Medication	6	Agree	Agree	Strongly agree	Agree	Agree	Agree	Strongly agree	Agree	Agree	Strongly agree	Agree	Strongly agree	Agree	Strongly agree	Agree	Uncertain	Strongly agree	Disagree	Disagree	Disagree	Disagree	Frequently	Sometimes	Occationally	Rarely	A good chance	Completely certain	A good chance	Completely certain	A good chance	Completely certain	No	No	No	No	Yes	Yes	No
hpt368	56	F	Married	Yes	Basic	Farmer	7	Diabetes	NHIS	Anti Dibetic and Hypertensive medication	7	Agree	Agree	Strongly agree	Agree	Agree	Agree	Strongly agree	Agree	Agree	Strongly agree	Agree	Strongly agree	Agree	Strongly agree	Agree	Uncertain	Agree	Disagree	Disagree	Disagree	Disagree	Frequently	Sometimes	Occationally	Rarely	A good chance	Completely certain	A good chance	Completely certain	A good chance	Completely certain	No	No	No	No	Yes	Yes	No
hpt369	40	F	Married	Yes	Secondary/Vocational	Private work	3	Diabetes	NHIS	Anti Dibetic and Hypertensive medication	3	Disagree	Agree	Disagree	Agree	Disagree	Uncertain	Agree	Disagree	Agree	Agree	Strongly agree	Agree	Strongly agree	Agree	Strongly agree	Uncertain	Strongly agree	Strongly Disagree	Disagree	Agree	Disagree	Sometimes	Occationally	Sometimes	Never	Average Chance	A good chance	Completely certain	A good chance	Completely certain	Completely certain	No	No	No	No	Yes	No	No
hpt370	69	F	Married	Yes	Basic	Farmer	12	Diabetes	NHIS	Anti Dibetic and Hypertensive medication	12	Disagree	Agree	Agree	Strongly agree	Agree	Uncertain	Agree	Strongly agree	Agree	Strongly agree	Agree	Strongly agree	Agree	Strongly agree	Agree	Agree	Strongly agree	Disagree	Disagree	Strongly Disagree	Disagree	Sometimes	Sometimes	Sometimes	Never	A good chance	Completely certain	Average Chance	Completely certain	A good chance	Completely certain	No	No	No	No	Yes	Yes	No
hpt371	68	F	Married	Yes	Non-formal	Farmer	16	Renal Failure	NHIS	Anti Hypertensive Medication	16	Strongly agree	Disagree	Agree	Disagree	Agree	Uncertain	Agree	Strongly agree	Agree	Strongly agree	Agree	Agree	Uncertain	Agree	Uncertain	Agree	Agree	Strongly agree	Strongly agree	Strongly Disagree	Agree	Occationally	Sometimes	Sometimes	Frequently	Completely certain	A slight chance	A good chance	A good chance	A good chance	Completely certain	No	Yes	Yes	No	Yes	No	Yes
hpt372	74	F	Seperated/Widowed	Yes	Non-formal	Farmer	20	Heart Failure	NHIS	Anti Hypertensive Medication	20	Strongly agree	Disagree	Agree	Disagree	Agree	Uncertain	Agree	Strongly agree	Agree	Strongly agree	Agree	Agree	Uncertain	Agree	Uncertain	Agree	Agree	Strongly agree	Strongly agree	Strongly Disagree	Agree	Occationally	Sometimes	Sometimes	Frequently	Completely certain	A slight chance	A good chance	A good chance	A good chance	Completely certain	No	Yes	Yes	No	Yes	No	Yes
hpt373	60	F	Married	Yes	Secondary/Vocational	Private work	11	Heart Failure	NHIS	Anti Dibetic and Hypertensive medication	11	Strongly Disagree	Disagree	Disagree	Uncertain	Agree	Agree	Agree	Strongly agree	Strongly agree	Strongly agree	Agree	Agree	Strongly agree	Strongly agree	Uncertain	Disagree	Agree	Agree	Agree	Agree	Strongly agree	Occationally	Sometimes	Frequently	Sometimes	A good chance	Average Chance	A slight chance	A good chance	A good chance	Completely certain	No	No	No	Yes	Yes	No	No
hpt374	46	M	Married	Yes	Tertiary	Private work	6	Diabetes	Private	Anti Dibetic and Hypertensive medication	6	Disagree	Uncertain	Strongly Disagree	Agree	Disagree	Disagree	Strongly Disagree	Agree	Agree	Strongly agree	Agree	Strongly agree	Agree	Strongly agree	Agree	Uncertain	Disagree	Disagree	Disagree	Uncertain	Disagree	Frequently	Sometimes	Occationally	Frequently	Completely certain	A good chance	Completely certain	A good chance	Completely certain	Completely certain	No	No	No	No	Yes	Yes	No
hpt375	62	M	Married	Yes	Secondary/Vocational	Farmer	5	None	Private	Anti Hypertensive Medication	5	Strongly agree	Agree	Strongly agree	Agree	Agree	Strongly agree	Strongly agree	Agree	Strongly agree	Strongly agree	Agree	Strongly agree	Agree	Agree	Strongly agree	Strongly agree	Disagree	Strongly Disagree	Disagree	Strongly Disagree	Strongly Disagree	Never	Rarely	Occationally	Sometimes	A slight chance	Average Chance	A good chance	Completely certain	Averae Chance	Completely certain	No	No	No	Yes	Yes	Yes	No
hpt376	64	F	Married	No	Tertiary	Farmer	6	None	NHIS	Anti Hypertensive Medication	5	Agree	Agree	Agree	Strongly agree	Agree	Strongly agree	Strongly agree	Strongly agree	Agree	Agree	Agree	Agree	Strongly agree	Agree	Strongly agree	Agree	Strongly agree	Agree	Disagree	Disagree	Disagree	Sometimes	Occationally	Sometimes	Never	A good chance	A good chance	A good chance	A good chance	Completely certain	Completely certain	Yes	No	No	No	Yes	No	No
hpt377	38	F	Married	Yes	Non-formal	Farmer	4	None	NHIS	Anti Hypertensive Medication	4	Disagree	Strongly Disagree	Disagree	Agree	Disagree	Disagree	Agree	Agree	Strongly agree	Strongly agree	Agree	Agree	Strongly agree	Agree	Strongly agree	Uncertain	Disagree	Disagree	Disagree	Strongly Disagree	Disagree	Sometimes	Occationally	Frequently	Frequently	Average Chance	Completely certain	A good chance	A good chance	Completely certain	Completely certain	No	No	No	No	Yes	Yes	No
hpt378	39	F	Married	Yes	Tertiary	Government work	8	Heart Failure	Private	Anti Dibetic and Hypertensive medication	8	Disagree	Agree	Disagree	Agree	Disagree	Disagree	Agree	Agree	Strongly agree	Strongly agree	Agree	Strongly agree	Agree	Strongly agree	Agree	Uncertain	Disagree	Disagree	Disagree	Strongly Disagree	Disagree	Sometimes	Occationally	Frequently	Frequently	Average Chance	Completely certain	A good chance	A good chance	Completely certain	Completely certain	No	No	No	No	Yes	Yes	No
hpt379	48	F	Married	Yes	Secondary/Vocational	Private work	7	None	NHIS	Anti Hypertensive Medication	7	Disagree	Agree	Agree	Strongly agree	Agree	Agree	Strongly agree	Agree	Agree	Agree	Strongly agree	Agree	Strongly agree	Agree	Agree	Agree	Disagree	Disagree	Strongly Disagree	Disagree	Disagree	Sometimes	Occationally	Sometimes	Rarely	A good chance	Completely certain	Average Chance	A good chance	Completely certain	Completely certain	Yes	No	No	No	Yes	Yes	No
hpt380	50	F	Married	Yes	Tertiary	Government work	4	None	Private	Anti Hypertensive Medication	4	Disagree	Agree	Disagree	Strongly Disagree	Strongly Disagree	Uncertain	Agree	Strongly agree	Agree	Strongly agree	Agree	Strongly agree	Agree	Strongly agree	Agree	Uncertain	Agree	Disagree	Disagree	Disagree	Strongly Disagree	Frequently	Sometimes	Sometimes	Sometimes	Completely certain	A good chance	Completely certain	A good chance	Completely certain	A good chance	No	No	Yes	No	Yes	Yes	No
hpt381	50	F	Married	Yes	Basic	Government work	7	Diabetes	NHIS	Anti Dibetic and Hypertensive medication	7	Disagree	Agree	Disagree	Strongly Disagree	Strongly Disagree	Disagree	Agree	Strongly agree	Agree	Strongly agree	Agree	Strongly agree	Agree	Strongly agree	Agree	Disagree	Uncertain	Disagree	Disagree	Disagree	Strongly Disagree	Frequently	Sometimes	Sometimes	Sometimes	Completely certain	A good chance	Completely certain	A good chance	Completely certain	A good chance	No	No	Yes	No	Yes	Yes	No
hpt382	45	F	Married	Yes	Secondary/Vocational	Private work	6	Renal Failure	NHIS	Anti Hypertensive Medication	6	Disagree	Agree	Disagree	Strongly Disagree	Strongly Disagree	Disagree	Agree	Strongly agree	Agree	Strongly agree	Agree	Strongly agree	Agree	Strongly agree	Agree	Uncertain	Agree	Disagree	Disagree	Disagree	Strongly Disagree	Frequently	Sometimes	Sometimes	Sometimes	Completely certain	A good chance	Completely certain	A good chance	Completely certain	A good chance	No	No	Yes	No	Yes	Yes	No
hpt383	56	F	Seperated/Widowed	No	Basic	Unemployed	12	Diabetes	NHIS	Anti Hypertensive Medication	12	Agree	Uncertain	Agree	Disagree	Strongly agree	Strongly agree	Agree	Strongly agree	Strongly agree	Strongly agree	Agree	Agree	Agree	Agree	Agree	Agree	Disagree	Agree	Agree	Agree	Disagree	Sometimes	Occationally	Sometimes	Never	A good chance	Average Chance	Average Chance	Average Chance	A good chance	A good chance	Yes	Yes	Yes	Yes	Yes	No	Yes
hpt384	41	F	Married	Yes	Basic	Government work	2	None	None	Anti Hypertensive Medication	2	Agree	Uncertain	Agree	Disagree	Strongly agree	Strongly agree	Agree	Strongly agree	Strongly agree	Strongly agree	Agree	Agree	Agree	Agree	Agree	Agree	Disagree	Agree	Agree	Agree	Disagree	Sometimes	Occationally	Sometimes	Never	A good chance	Average Chance	Average Chance	Average Chance	A good chance	A good chance	Yes	Yes	Yes	Yes	Yes	No	Yes
hpt385	54	M	Married	Yes	Secondary/Vocational	Private work	4	None	NHIS	Anti Hypertensive Medication	4	Strongly agree	Agree	Uncertain	Disagree	Agree	Uncertain	Agree	Strongly agree	Agree	Agree	Agree	Agree	Uncertain	Agree	Uncertain	Agree	Strongly agree	Strongly agree	Agree	Disagree	Agree	Occationally	Rarely	Sometimes	Sometimes	A slight chance	Average Chance	Average Chance	A slight chance	Completely certain	Completely certain	Yes	No	No	No	Yes	No	Yes
hpt386	62	M	Married	Yes	Tertiary	Government work	3	Diabetes	NHIS	Anti Dibetic and Hypertensive medication	3	Strongly agree	Agree	Uncertain	Disagree	Disagree	Uncertain	Agree	Strongly agree	Agree	Strongly agree	Agree	Agree	Uncertain	Agree	Uncertain	Agree	Strongly agree	Strongly agree	Agree	Disagree	Agree	Occationally	Rarely	Sometimes	Sometimes	A slight chance	Average Chance	Average Chance	A slight chance	Completely certain	Completely certain	No	No	No	No	Yes	No	Yes
hpt387	70	F	Single	Yes	Tertiary	Government work	3	Diabetes	NHIS	Anti Dibetic and Hypertensive medication	3	Strongly agree	Agree	Uncertain	Uncertain	Agree	Uncertain	Agree	Strongly agree	Agree	Agree	Agree	Uncertain	Agree	Agree	Uncertain	Agree	Agree	Strongly agree	Agree	Uncertain	Agree	Occationally	Rarely	Sometimes	Sometimes	Average Chance	A good chance	Average Chance	A slight chance	Completely certain	Completely certain	No	No	No	No	Yes	No	Yes
hpt388	37	F	Single	Yes	Basic	Government work	5	None	NHIS	Anti Hypertensive Medication	5	Strongly agree	Agree	Uncertain	Uncertain	Disagree	Agree	Disagree	Agree	Strongly agree	Agree	Agree	Agree	Uncertain	Agree	Uncertain	Agree	Strongly agree	Strongly agree	Agree	Disagree	Agree	Occationally	Rarely	Sometimes	Sometimes	Average Chance	A good chance	Average Chance	A slight chance	Completely certain	Completely certain	Yes	No	No	No	Yes	No	Yes
hpt389	43	F	Married	Yes	Basic	Government work	3	None	None	Anti Hypertensive Medication	3	Strongly agree	Agree	Uncertain	Uncertain	Disagree	Agree	Uncertain	Agree	Strongly agree	Strongly agree	Agree	Agree	Uncertain	Agree	Uncertain	Agree	Strongly agree	Strongly agree	Agree	Strongly Disagree	Agree	Occationally	Rarely	Sometimes	Sometimes	Average Chance	A good chance	Average Chance	A slight chance	Completely certain	Completely certain	Yes	No	No	No	Yes	No	Yes
hpt390	72	F	Married	Yes	Tertiary	Private work	1	None	NHIS	Anti Hypertensive Medication	1	Strongly agree	Agree	Agree	Uncertain	Agree	Uncertain	Agree	Strongly agree	Agree	Strongly agree	Agree	Agree	Agree	Uncertain	Uncertain	Agree	Strongly agree	Strongly agree	Agree	Disagree	Agree	Occationally	Rarely	Sometimes	Sometimes	Average Chance	A good chance	Average Chance	A slight chance	Completely certain	Completely certain	No	No	No	No	Yes	No	Yes
hpt391	51	F	Married	Yes	Tertiary	Government work	3	None	NHIS	Anti Hypertensive Medication	3	Disagree	Agree	Disagree	Strongly Disagree	Strongly Disagree	Disagree	Agree	Strongly agree	Agree	Strongly agree	Agree	Strongly agree	Agree	Strongly agree	Agree	Uncertain	Agree	Disagree	Disagree	Disagree	Strongly Disagree	Frequently	Sometimes	Occationally	Sometimes	Completely certain	A good chance	Completely certain	A good chance	Completely certain	A good chance	No	No	Yes	No	Yes	Yes	No
hpt392	52	F	Married	No	Non-formal	Farmer	4	None	None	Anti Hypertensive Medication	4	Disagree	Agree	Disagree	Strongly Disagree	Strongly Disagree	Disagree	Agree	Strongly agree	Agree	Strongly agree	Agree	Strongly agree	Agree	Strongly agree	Agree	Uncertain	Agree	Disagree	Disagree	Disagree	Strongly Disagree	Frequently	Sometimes	Sometimes	Sometimes	Completely certain	A good chance	Completely certain	A good chance	Completely certain	A good chance	No	No	Yes	No	Yes	Yes	No
hpt393	48	F	Married	Yes	Tertiary	Government work	7	Diabetes	Private	Anti Dibetic and Hypertensive medication	7	Disagree	Agree	Disagree	Strongly Disagree	Strongly Disagree	Disagree	Agree	Strongly agree	Agree	Strongly agree	Agree	Strongly agree	Agree	Strongly agree	Agree	Uncertain	Agree	Disagree	Disagree	Disagree	Strongly Disagree	Frequently	Sometimes	Sometimes	Sometimes	Completely certain	A good chance	Completely certain	A good chance	Completely certain	A good chance	No	No	Yes	No	Yes	Yes	No
hpt394	48	F	Married	Yes	Basic	Private work	5	None	NHIS	Anti Hypertensive Medication	5	Agree	Strongly agree	Uncertain	Agree	Agree	Strongly agree	Strongly agree	Agree	Agree	Strongly agree	Agree	Strongly agree	Agree	Agree	Strongly agree	Disagree	Agree	Disagree	Strongly Disagree	Disagree	Uncertain	Sometimes	Never	Rarely	Never	A good chance	Completely certain	A good chance	Completely certain	A slight chance	Completely certain	No	No	Yes	No	Yes	Yes	Yes
hpt395	42	F	Married	Yes	Tertiary	Government work	4	None	Private	Anti Hypertensive Medication	4	Disagree	Agree	Disagree	Strongly Disagree	Strongly Disagree	Disagree	Agree	Strongly agree	Agree	Strongly agree	Agree	Strongly agree	Agree	Strongly agree	Agree	Uncertain	Agree	Disagree	Disagree	Disagree	Strongly Disagree	Frequently	Sometimes	Sometimes	Sometimes	Completely certain	A good chance	Completely certain	A good chance	Completely certain	A good chance	No	No	Yes	No	Yes	Yes	No
hpt396	40	F	Married	Yes	Tertiary	Government work	3	None	Private	Anti Hypertensive Medication	3	Disagree	Strongly Disagree	Disagree	Agree	Disagree	Disagree	Agree	Agree	Strongly agree	Strongly agree	Agree	Agree	Strongly agree	Agree	Strongly agree	Uncertain	Disagree	Disagree	Disagree	Strongly Disagree	Disagree	Sometimes	Occationally	Frequently	Frequently	Average Chance	Completely certain	A good chance	A good chance	Completely certain	Completely certain	No	No	No	No	Yes	Yes	No
hpt397	29	F	Single	No	Tertiary	Student	3	None	NHIS	Anti Hypertensive Medication	3	Disagree	Strongly Disagree	Disagree	Agree	Disagree	Disagree	Agree	Agree	Strongly agree	Strongly agree	Agree	Strongly agree	Agree	Strongly agree	Agree	Uncertain	Disagree	Disagree	Disagree	Strongly Disagree	Disagree	Sometimes	Occationally	Frequently	Frequently	Average Chance	Completely certain	A good chance	A good chance	Completely certain	Completely certain	No	No	No	No	Yes	Yes	No
hpt398	55	F	Married	Yes	Secondary/Vocational	Private work	6	None	NHIS	Anti Hypertensive Medication	6	Disagree	Agree	Disagree	Strongly Disagree	Strongly Disagree	Agree	Strongly agree	Strongly agree	Agree	Strongly agree	Agree	Strongly agree	Agree	Strongly agree	Agree	Uncertain	Agree	Disagree	Disagree	Disagree	Strongly Disagree	Frequently	Sometimes	Sometimes	Sometimes	Completely certain	A good chance	Completely certain	A good chance	Completely certain	A good chance	No	No	Yes	No	Yes	Yes	No
hpt399	39	F	Married	Yes	Tertiary	Government work	1	None	NHIS	Anti Hypertensive Medication	1	Agree	Uncertain	Agree	Disagree	Strongly agree	Strongly agree	Agree	Strongly agree	Strongly agree	Strongly agree	Agree	Agree	Agree	Agree	Agree	Agree	Disagree	Agree	Agree	Agree	Disagree	Sometimes	Rarely	Sometimes	Never	A good chance	Average Chance	Average Chance	Average Chance	A good chance	A good chance	Yes	Yes	Yes	Yes	Yes	No	Yes
[truncated: 23 more columns]
